# Supplementary material for: Protist taxonomic and functional diversity in aquatic ecosystems of the Brazilian Atlantic Forest
Source: PeerJ. 2023 Aug 1;11:e15762. doi: 10.7717/peerj.15762 (PMC10402703; doi:10.7717/peerj.15762)
Supplement: Supplemental Information 1 [file peerj-11-15762-s001.xlsx]

## Sheet: Supplemental Table S1
Supplemental Table S1. Protist OTU Ids, their taxonomic and functional assignments.
OTU Id	Supergroup	Phylum	Class	Order	Family	Genus	Functional
AF274258.1.1737	TSAR	Dinoflagellata	Dinophyceae	Gonyaulacales	Gonyaulacales	Gonyaulax	Phototrophic
KX519761.1.1759	TSAR	Protalveolata	Perkinsidae	Perkinsidae	Perkinsidae	Parvilucifera	Parasitic
203ede20490f679245cf50f8be2269de	TSAR	Apicomplexa	NoveApicomplexClas2	NoveApicomplexClas2	NoveApicomplexClas2	NoveApicomplexClas2	Parasitic
91d65d2da120723fdeeb0f2c538181b0	TSAR	Apicomplexa	Conoidasida	Gregarinasina	Eugregarinorida	NA	Parasitic
23a5131d165788d11a4b52aaf553e887	TSAR	Apicomplexa	Conoidasida	Gregarinasina	Eugregarinorida	NA	Parasitic
6b5a649c8e5944fdbe8c3519f57825d4	TSAR	Apicomplexa	Conoidasida	Gregarinasina	Eugregarinorida	NA	Parasitic
dc6994b1b51a9600977e48ea916fa9b3	TSAR	Apicomplexa	Conoidasida	Gregarinasina	Eugregarinorida	NA	Parasitic
497bca502c1e3a0f17046203a89370a6	TSAR	Apicomplexa	Conoidasida	Gregarinasina	Eugregarinorida	NA	Parasitic
59c6791905b15158a4626e5ab1abaf25	TSAR	Apicomplexa	Conoidasida	Gregarinasina	Eugregarinorida	NA	Parasitic
8f8894a9bfef14574dfffaf3f77f69e1	Obazoa	NucleariidaanFonticulgroup	NucleariidaanFonticulgroup	NucleariidaanFonticulgroup	Nucleariidae	Nuclearia	Consumers
KY077704.1.1404	Obazoa	Apusomonadidae	Apusomonadidae	Apusomonadidae	Apusomonadidae	Amastigomonas	Consumers
KJ925325.1.1671	Cryptista	Kathablepharidae	Kathablepharidae	Kathablepharidae	Kathablepharidae	uncultured	Consumers
581b859064da3c04c4d9058f89bd6050	Cryptista	Kathablepharidae	Kathablepharidae	Kathablepharidae	Kathablepharidae	Hatena	Consumers
d0c28cdb0308f6ec44c558062b6e75e4	Cryptista	Kathablepharidae	Kathablepharidae	Kathablepharidae	Kathablepharidae	Hatena	Consumers
2520ab187828ef25fc0dd7b7422d10a6	Obazoa	Holozoa	Choanoflagellida	Acanthoecida	Acanthoecidae	Acanthoecidae	Consumers
91c6d1a02e7fc6cf1dea84126fe4ca8c	Obazoa	Holozoa	Choanoflagellida	Acanthoecida	Acanthoecidae	Acanthoecidae	Consumers
MF474349.1.1613	TSAR	Ciliophora	Intramacronucleata	Conthreep	Prostomatea	Cryptocaryon	Parasitic
dec59b3cc024b1eb545582af753dada4	Obazoa	Holozoa	Choanoflagellida	Codonosigidae	Codonosigidae	Monosiga	Consumers
b411b70138b616fb7b6a84173623213b	Obazoa	Holozoa	Choanoflagellida	Codonosigidae	Codonosigidae	Monosiga	Consumers
10d79cce1df59fd1d8545e38fe0ed172	Obazoa	Holozoa	Choanoflagellida	Acanthoecida	NA	NA	Consumers
c39d1833874707654e49986ef681a386	Obazoa	Holozoa	Choanoflagellida	Acanthoecida	NA	NA	Consumers
53fc22380a15b39745da8af50d6df8eb	Obazoa	Holozoa	Choanoflagellida	Craspedida	Salpingoecidae	Salpingoecidae	Consumers
e614773067a856fbd2e54c7d06d43ba6	Obazoa	Holozoa	Choanoflagellida	Craspedida	Craspedida	Craspedida	Consumers
EU011929.1.1795	Obazoa	Holozoa	Choanoflagellida	Craspedida	Salpingoecidae	Salpingoecidae	Consumers
db0180e0c2ea519675ca276ee750e857	Obazoa	Holozoa	Choanoflagellida	Craspedida	Salpingoecidae	Salpingoecidae	Consumers
332a1073512ca5eddc322f39b290947f	Obazoa	Holozoa	Choanoflagellida	Craspedida	Salpingoecidae	Salpingoecidae	Consumers
GU647175.1.1533	Obazoa	Holozoa	Choanoflagellida	Craspedida	Salpingoecidae	Salpingoecidae	Consumers
2f9d68231555fcbe9bd3c5f68af6aef8	Obazoa	Holozoa	Choanoflagellida	Craspedida	Salpingoecidae	Salpingoecidae	Consumers
4b587c65b12b8d2ec22d987f08fa872c	Obazoa	Holozoa	Choanoflagellida	Craspedida	Salpingoecidae	Salpingoecidae	Consumers
276676d31b8ac565d9dc7e666e74017c	Obazoa	Holozoa	Choanoflagellida	Craspedida	Salpingoecidae	Salpingoecidae	Consumers
FPLS01023568.1.1433	Obazoa	Holozoa	Choanoflagellida	Craspedida	Salpingoecidae	Salpingoecidae	Consumers
8c50dd15d0662b077c7cbb785f48f29d	Obazoa	Holozoa	Choanoflagellida	Craspedida	Salpingoecidae	FreshwateChoanoflagellate2	Consumers
JN054678.1.1515	Obazoa	Holozoa	Choanoflagellida	Craspedida	Salpingoecidae	FreshwateChoanoflagellate2	Consumers
69c2a1c2aac2d56d1fd0e0821f774098	Obazoa	Holozoa	Choanoflagellida	Craspedida	Salpingoecidae	FreshwateChoanoflagellate2	Consumers
bf79ad30b6e3d273f3a66728ea3a76e6	Obazoa	Holozoa	Choanoflagellida	Craspedida	NA	NA	Consumers
bb0f0de753d3d468e1c3ab44d3504cbc	Obazoa	Holozoa	Choanoflagellida	Codonosigidae	Codonosigidae	Monosiga	Consumers
e0499a0ae93bbc81315e70d621f19d17	Obazoa	Holozoa	Choanoflagellida	Codonosigidae	Codonosigidae	Monosiga	Consumers
4c6d21c83caef188716efbb788f3df45	Obazoa	Holozoa	Choanoflagellida	Codonosigidae	Codonosigidae	Monosiga	Consumers
DQ207563.1.1687	CRuMs	Ancyromonadida	Ancyromonadida	Ancyromonadida	Ancyromonadida	Ancyromonadida	Consumers
fc6c5d95cb0c3d26ea171b8ae47fe2d8	CRuMs	Ancyromonadida	Ancyromonadida	Ancyromonadida	Ancyromonadida	Ancyromonadida	Consumers
fb0c13720fc95f02ff53eb814510e950	Obazoa	Holozoa	Ichthyosporea	Rhinosporideacae	Rhinosporideacae	Rhinosporideacae	Parasitic
JN054668.1.1519	Obazoa	Holozoa	Ichthyosporea	Pseudoperkinsidae	Pseudoperkinsidae	Anurofeca	Parasitic
0efe4cff98e8468503d33d5e44b182b1	Obazoa	Holozoa	Ichthyosporea	Pseudoperkinsidae	Pseudoperkinsidae	NA	Parasitic
d826ec70c9f66483a80cb41b170ae514	Obazoa	Holozoa	Ichthyosporea	Pseudoperkinsidae	Pseudoperkinsidae	NA	Parasitic
AF070445.1.1802	Obazoa	Holozoa	Ichthyosporea	Pseudoperkinsidae	Pseudoperkinsidae	Pseudoperkinsidae	Parasitic
7157c7f409a52b2a184e390c4b1b72ee	TSAR	Ciliophora	Intramacronucleata	Conthreep	Plagiopylea	Epalxella	Consumers
1693a32210327a32d602a43eaca0a7bb	TSAR	Ciliophora	Intramacronucleata	Conthreep	Plagiopylea	NA	Consumers
2ddcaa34863236dd5d8569efaf2c460e	TSAR	Ciliophora	Intramacronucleata	Conthreep	Plagiopylea	NA	Consumers
9ed920c621ac00a0143a6a48bc139503	Obazoa	Apusomonadidae	Apusomonadidae	Apusomonadidae	Apusomonadidae	Amastigomonas	Consumers
f74e0a5c04f692cf94c03d6d5df83613	Obazoa	Apusomonadidae	Apusomonadidae	Apusomonadidae	Apusomonadidae	Amastigomonas	Consumers
5b2e60a76bf707dfdb5e4dde83f6977b	Obazoa	Apusomonadidae	Apusomonadidae	Apusomonadidae	Apusomonadidae	Amastigomonas	Consumers
cc000e43b467f786341333703a23b7ea	TSAR	Labyrinthulomycetes	Labyrinthulomycetes	Labyrinthulomycetes	Amphitraemidae	Amphitraemidae	Consumers
1596293932e65fa07d67e50b60c0d536	TSAR	Labyrinthulomycetes	Labyrinthulomycetes	Labyrinthulomycetes	Amphitraemidae	Amphitraemidae	Consumers
9cfa6209364acad1daa531db17747f3a	TSAR	Labyrinthulomycetes	Labyrinthulomycetes	Labyrinthulomycetes	Amphitraemidae	Amphitraemidae	Consumers
4ebc5586469ffad4f6657ec2b8441723	TSAR	Labyrinthulomycetes	Labyrinthulomycetes	Labyrinthulomycetes	Amphitraemidae	Amphitraemidae	Consumers
69615937d665ba5efd3dc213daab7def	TSAR	Labyrinthulomycetes	Labyrinthulomycetes	Labyrinthulomycetes	Amphitraemidae	Amphitraemidae	Consumers
d5b0a532f96297b4ad65c1a68f0ba0ea	TSAR	Labyrinthulomycetes	Labyrinthulomycetes	Labyrinthulomycetes	Amphitraemidae	Amphitraemidae	Consumers
35d7d21a058b84a5050717062985646b	TSAR	Labyrinthulomycetes	Labyrinthulomycetes	Labyrinthulomycetes	Amphitraemidae	Amphitraemidae	Consumers
3764f7355741841731b7adcb1feeb755	TSAR	Labyrinthulomycetes	Labyrinthulomycetes	Labyrinthulomycetes	Amphitraemidae	Amphitraemidae	Consumers
585c408efa23cde75d3a3ab0d8056ddb	TSAR	Labyrinthulomycetes	Labyrinthulomycetes	Labyrinthulomycetes	Amphitraemidae	Amphitraemidae	Consumers
572912ea708126b381bfef8fa4bb70f5	TSAR	Labyrinthulomycetes	Labyrinthulomycetes	Labyrinthulomycetes	Amphitraemidae	Amphitraemidae	Consumers
e34141410285603eb4db43bfe063883f	TSAR	Labyrinthulomycetes	Labyrinthulomycetes	Labyrinthulomycetes	Amphitraemidae	Amphitraemidae	Consumers
f4893534d0085072ef2611ea7c55f9dd	TSAR	Labyrinthulomycetes	Labyrinthulomycetes	Labyrinthulomycetes	Amphitraemidae	Amphitraemidae	Consumers
723009a89c4305a7b55f88539d02ba66	TSAR	Labyrinthulomycetes	Labyrinthulomycetes	Labyrinthulomycetes	Amphitraemidae	Amphitraemidae	Consumers
6ec1b30624585ef75948b2638f8c482b	TSAR	Ciliophora	Intramacronucleata	Conthreep	Nassophorea	Nassophorea	Consumers
8cf1941f7322400db33a4dd4982fb519	TSAR	Ciliophora	Intramacronucleata	Conthreep	Nassophorea	Zosterodasys	Consumers
9ff48a911ceacf7dc29d73e7c2c09cea	TSAR	Ciliophora	Intramacronucleata	Conthreep	Nassophorea	Zosterodasys	Consumers
2d4889aca087f7988f1d89f44a312438	TSAR	Ciliophora	Intramacronucleata	Conthreep	Nassophorea	Zosterodasys	Consumers
9b7950a8a57494d7d5b14383a7af4335	TSAR	Ciliophora	Intramacronucleata	Conthreep	Nassophorea	Zosterodasys	Consumers
26de62e5a81c1d2e378ef06cf2357164	TSAR	Ciliophora	Intramacronucleata	Conthreep	NA	NA	Consumers
33df76ed9d402d5fa0c28b12ea92bcdb	TSAR	Ciliophora	Intramacronucleata	Conthreep	Oligohymenophorea	uncultured	Consumers
LN869943.1.1714	TSAR	Ciliophora	Intramacronucleata	Conthreep	Oligohymenophorea	Scuticociliatia	Consumers
7ea7c96fdf114b5cf10a2c44c828eb14	TSAR	Ciliophora	Intramacronucleata	Conthreep	Oligohymenophorea	NA	Consumers
bc48c361c4d61c50172645bc4c3c2473	TSAR	Ciliophora	Intramacronucleata	Conthreep	Oligohymenophorea	Homalogastra	Consumers
59238bc3b46868067e592b1a3d3e98c7	TSAR	Ciliophora	Intramacronucleata	Conthreep	Oligohymenophorea	NA	Consumers
53ab5d1af44cca81c6a63e2923a19220	TSAR	Ciliophora	Intramacronucleata	Conthreep	Oligohymenophorea	NA	Consumers
3c0d3f49cc5269be226a3344f129bf9d	TSAR	Ciliophora	Intramacronucleata	Conthreep	Oligohymenophorea	NA	Consumers
d73d4dd205e8687efb148c15025b76bb	TSAR	Ciliophora	Intramacronucleata	Conthreep	Oligohymenophorea	NA	Consumers
381db1518b320f57d4afd9d864074410	TSAR	Ciliophora	Intramacronucleata	Conthreep	NA	NA	Consumers
64fdf493773453ac14e42fad41eda6de	TSAR	Ciliophora	Intramacronucleata	Conthreep	Oligohymenophorea	NA	Consumers
2dd72bb10f8031070f7428ef517e76a1	TSAR	Ciliophora	Intramacronucleata	Conthreep	Oligohymenophorea	NA	Consumers
fc4cdb64b518c10951578588582e1549	TSAR	Ciliophora	Intramacronucleata	Conthreep	Oligohymenophorea	NA	Consumers
349d545eae0c100c84252da027ed881b	TSAR	Ciliophora	Intramacronucleata	Conthreep	NA	NA	Consumers
2bd6a4e4f08e1d46d5813d6ab23c9085	TSAR	Ciliophora	Intramacronucleata	Conthreep	Phyllopharyngea	Cyrtophoria	Consumers
80e32d85d849f57d226e378a85dfb389	TSAR	Ciliophora	Intramacronucleata	Conthreep	Oligohymenophorea	Cristigera	Consumers
KC753488.1.1721	TSAR	Ciliophora	Intramacronucleata	Conthreep	Phyllopharyngea	Dysteria	Consumers
EU242512.1.1723	TSAR	Ciliophora	Intramacronucleata	Conthreep	Phyllopharyngea	Dysteria	Consumers
0f648d251522989d432cd26ff36675eb	TSAR	Ciliophora	Intramacronucleata	Conthreep	Phyllopharyngea	Dysteria	Consumers
JQ904059.1.1656	TSAR	Ciliophora	Intramacronucleata	Conthreep	Phyllopharyngea	Chlamydodon	Consumers
JQ904057.1.1530	TSAR	Ciliophora	Intramacronucleata	Conthreep	Phyllopharyngea	Chlamydodon	Consumers
5285eed65a5dfa8af3fc42ef627b6adf	TSAR	Ciliophora	Intramacronucleata	Conthreep	Phyllopharyngea	Chlamydodon	Consumers
17063af77e3d5e4d4845b7991e5dacc5	TSAR	Ciliophora	Intramacronucleata	Conthreep	Oligohymenophorea	Scuticociliatia	Consumers
b4b7fe44e560e9f370073a2f400f1626	TSAR	Ciliophora	Intramacronucleata	Conthreep	Oligohymenophorea	Scuticociliatia	Consumers
4b5ce23bc9ab2421af0d272d7494ba5e	TSAR	Ciliophora	Intramacronucleata	Conthreep	Oligohymenophorea	Scuticociliatia	Consumers
a90bdc474acff0b78d2b677cb2d227d4	TSAR	Ciliophora	Intramacronucleata	Conthreep	Oligohymenophorea	Scuticociliatia	Consumers
LN870013.1.1707	TSAR	Ciliophora	Intramacronucleata	Conthreep	Oligohymenophorea	Peniculia	Consumers
bedde2c765c9cae7e885a3bca1521698	TSAR	Ciliophora	Intramacronucleata	Conthreep	Oligohymenophorea	Frontonia	Consumers
d6699991689a9db03711eddbe3e910a2	TSAR	Ciliophora	Intramacronucleata	Conthreep	Oligohymenophorea	Frontonia	Consumers
FJ868196.1.1668	TSAR	Ciliophora	Intramacronucleata	Conthreep	Oligohymenophorea	Frontonia	Consumers
dce3813ac2fcad05ed65821b4e834862	TSAR	Ciliophora	Intramacronucleata	Conthreep	Oligohymenophorea	Frontonia	Consumers
39413914a3a3a58920a2306faba33019	TSAR	Ciliophora	Intramacronucleata	Conthreep	Oligohymenophorea	Frontonia	Consumers
JQ868786.1.1667	TSAR	Ciliophora	Intramacronucleata	Conthreep	Oligohymenophorea	Frontonia	Consumers
MG456580.1.1599	TSAR	Ciliophora	Intramacronucleata	Conthreep	Oligohymenophorea	Frontonia	Consumers
e200ab0fb9f849290822199c3d807a94	TSAR	Ciliophora	Intramacronucleata	Conthreep	Oligohymenophorea	Frontonia	Consumers
610a42cb2a29134c728daa1f31a9cfab	TSAR	Ciliophora	Intramacronucleata	Conthreep	Oligohymenophorea	Frontonia	Consumers
AF255359.1.1666	TSAR	Ciliophora	Intramacronucleata	Conthreep	Oligohymenophorea	Frontonia	Consumers
7d6e1e467a3716bf111ec67215f957a6	TSAR	Ciliophora	Intramacronucleata	Conthreep	Oligohymenophorea	Frontonia	Consumers
8b93f1446bac4e586092dc93073f32db	TSAR	Ciliophora	Intramacronucleata	Conthreep	Oligohymenophorea	Frontonia	Consumers
FJ868200.1.1744	TSAR	Ciliophora	Intramacronucleata	Conthreep	Oligohymenophorea	Frontonia	Consumers
FJ868201.1.1747	TSAR	Ciliophora	Intramacronucleata	Conthreep	Oligohymenophorea	Frontonia	Consumers
1d44b6e7a39c1392acf91a3f581cccef	TSAR	Ciliophora	Intramacronucleata	Conthreep	Oligohymenophorea	Frontonia	Consumers
558b260c82414cf2881552f1828ce270	TSAR	Ciliophora	Intramacronucleata	Conthreep	Oligohymenophorea	Frontonia	Consumers
AY102613.1.1701	TSAR	Ciliophora	Intramacronucleata	Conthreep	Oligohymenophorea	Paramecium	Consumers
c975672ce3acd14b364ed2f66ba9bb06	TSAR	Ciliophora	Intramacronucleata	Conthreep	Oligohymenophorea	Paramecium	Consumers
MG994988.1.1672	TSAR	Ciliophora	Intramacronucleata	Conthreep	Oligohymenophorea	Paramecium	Consumers
300b237fb4b3044f08091e993479eef8	TSAR	Ciliophora	Intramacronucleata	Conthreep	Oligohymenophorea	Paramecium	Consumers
ed992e0598841c426a112a2972859bbc	TSAR	Ciliophora	Intramacronucleata	Conthreep	Oligohymenophorea	Stokesia	Consumers
638c9d7b6861daa579ec851a017cacdb	TSAR	Ciliophora	Intramacronucleata	Conthreep	Oligohymenophorea	Stokesia	Consumers
dde139feff94d65467f952a9bb12ccbd	TSAR	Ciliophora	Intramacronucleata	Conthreep	Oligohymenophorea	Stokesia	Consumers
AF255358.1.1746	TSAR	Ciliophora	Intramacronucleata	Conthreep	Oligohymenophorea	Peniculia	Consumers
aa3f35cc88c8c193d4c2b9d97dddc328	TSAR	Ciliophora	Intramacronucleata	Conthreep	Oligohymenophorea	Peniculia	Consumers
e19c31499bf56af5a0c4d3472c44cc43	TSAR	Ciliophora	Intramacronucleata	Conthreep	Oligohymenophorea	Dexiotricha	Consumers
c9801fdeba2baaa39849b50a35db18d1	TSAR	Ciliophora	Intramacronucleata	Conthreep	Oligohymenophorea	Hymenostomatia	Consumers
eabf85ce69afd85fc433bcf4a70f57f6	TSAR	Ciliophora	Intramacronucleata	Conthreep	Oligohymenophorea	Hymenostomatia	Consumers
c5251543ec1fadf370d141dcfa68602a	TSAR	Ciliophora	Intramacronucleata	Conthreep	Oligohymenophorea	Hymenostomatia	Consumers
855eeb8de03ceed419a5699e2bc318a4	TSAR	Ciliophora	Intramacronucleata	Conthreep	Oligohymenophorea	Hymenostomatia	Consumers
eba5c4e457d15ad0fffb9bec2372fb05	TSAR	Ciliophora	Intramacronucleata	Conthreep	Oligohymenophorea	Hymenostomatia	Consumers
HM030739.1.1738	TSAR	Ciliophora	Intramacronucleata	Conthreep	Oligohymenophorea	Hymenostomatia	Consumers
AY083000.1.1750	TSAR	Ciliophora	Intramacronucleata	Conthreep	Oligohymenophorea	Hymenostomatia	Consumers
f7286689a6bca20bba0d97ec5a6038d4	TSAR	Ciliophora	Intramacronucleata	Conthreep	Oligohymenophorea	Hymenostomatia	Consumers
06a178a67b3ae116378f400e4bb1fe32	TSAR	Ciliophora	Intramacronucleata	Conthreep	Oligohymenophorea	Hymenostomatia	Consumers
de6e07e6509a5267602e37725b82b70b	TSAR	Ciliophora	Intramacronucleata	Conthreep	Oligohymenophorea	Hymenostomatia	Consumers
7227fdcaa31aa1355696f47a38885303	TSAR	Ciliophora	Intramacronucleata	Conthreep	Oligohymenophorea	NA	Consumers
413d68589f0d377462b6f42440c696e0	TSAR	Ciliophora	Intramacronucleata	Conthreep	Oligohymenophorea	NA	Consumers
974ae08ba048b7da25b9ccd19b8c5fe9	TSAR	Ciliophora	Intramacronucleata	Conthreep	Oligohymenophorea	NA	Consumers
AY642718.1.1679	TSAR	Ciliophora	Intramacronucleata	Conthreep	Oligohymenophorea	Hymenostomatia	Consumers
88b391fba10789ce747a57b831217a86	TSAR	Ciliophora	Intramacronucleata	Conthreep	Oligohymenophorea	Hymenostomatia	Consumers
ed89118d87a3ed60a74ae6ae6bbbd84c	TSAR	Ciliophora	Intramacronucleata	Conthreep	Oligohymenophorea	Hymenostomatia	Consumers
KY218623.1.1492	TSAR	Ciliophora	Intramacronucleata	Conthreep	Oligohymenophorea	Hymenostomatia	Consumers
5d86de366b591ea85b78b024236c26a5	TSAR	Ciliophora	Intramacronucleata	Conthreep	Oligohymenophorea	Hymenostomatia	Consumers
HM014309.1.1750	TSAR	Ciliophora	Intramacronucleata	Conthreep	Oligohymenophorea	Hymenostomatia	Consumers
59aa1bff91d0a1e8e280687abf97c498	TSAR	Ciliophora	Intramacronucleata	Conthreep	Oligohymenophorea	Hymenostomatia	Consumers
8d13b4a45b749c29b1ab76e0586f2b44	TSAR	Ciliophora	Intramacronucleata	Conthreep	Oligohymenophorea	Hymenostomatia	Consumers
e96c692de2d8dd6b6f49c42671e3acfe	TSAR	Ciliophora	Intramacronucleata	Conthreep	Oligohymenophorea	Hymenostomatia	Consumers
29548d4485e4fe8447f1487f93c24f96	TSAR	Ciliophora	Intramacronucleata	Conthreep	Oligohymenophorea	Tetrahymena	Consumers
6a2ecd4d9683f1af253c5b7ae7e7f319	TSAR	Ciliophora	Intramacronucleata	Conthreep	Oligohymenophorea	Tetrahymena	Consumers
0707206cc102be93a711ee9719fcf8cb	TSAR	Ciliophora	Intramacronucleata	Conthreep	Oligohymenophorea	Tetrahymena	Consumers
961ea2bc949ff91272a668e7e375334f	TSAR	Ciliophora	Intramacronucleata	Conthreep	Oligohymenophorea	Tetrahymena	Consumers
023b5dc30abbd8616853c3dee0f4ce4e	TSAR	Ciliophora	Intramacronucleata	Conthreep	Oligohymenophorea	Tetrahymena	Consumers
7988c35bf0893b958dd0d213c0a45559	TSAR	Ciliophora	Intramacronucleata	Conthreep	Oligohymenophorea	Tetrahymena	Consumers
6059ccadb970a88393a369132180b865	TSAR	Ciliophora	Intramacronucleata	Conthreep	Oligohymenophorea	Tetrahymena	Consumers
U17356.1.1750	TSAR	Ciliophora	Intramacronucleata	Conthreep	Oligohymenophorea	Tetrahymena	Consumers
67d200ccb27830a69431b4beb051bade	TSAR	Ciliophora	Intramacronucleata	Conthreep	Oligohymenophorea	Tetrahymena	Consumers
6bdefe96d5f23a194a2da0cf9ac83dca	TSAR	Ciliophora	Intramacronucleata	Conthreep	Oligohymenophorea	Oligohymenophorea	Consumers
JQ692043.1.1666	TSAR	Ciliophora	Intramacronucleata	Conthreep	Oligohymenophorea	NA	Consumers
KF256820.1.1749	TSAR	Ciliophora	Intramacronucleata	Conthreep	Oligohymenophorea	Scuticociliatia	Consumers
c37c115593ce4ca712f58aed35427990	TSAR	Ciliophora	Intramacronucleata	Conthreep	Oligohymenophorea	Protocyclidium	Consumers
KC349950.1.1641	TSAR	Ciliophora	Intramacronucleata	Conthreep	Prostomatea	Prostomatea	Consumers
AM292313.1.1704	TSAR	Ciliophora	Intramacronucleata	Conthreep	Prostomatea	Prostomatea	Consumers
6a746fe99bfc47fd7e187c21e008d875	TSAR	Ciliophora	Intramacronucleata	Conthreep	Prostomatea	Levicoleps	Consumers
5d75a7d5b36b99429e9df2468226a919	TSAR	Ciliophora	Intramacronucleata	Conthreep	Prostomatea	Cryptocaryon	Parasitic
0893710b52b76227ce062de552999e92	TSAR	Ciliophora	Intramacronucleata	Conthreep	Prostomatea	Cryptocaryon	Parasitic
c76c5820139cbe9a5c50bf52162a629d	TSAR	Ciliophora	Intramacronucleata	Conthreep	Prostomatea	Cryptocaryon	Parasitic
b05100b36a53947b6baec8208192b7ab	TSAR	Ciliophora	Intramacronucleata	Conthreep	Prostomatea	Cryptocaryon	Parasitic
e1f350291f79324b9ad319085a7f6789	TSAR	Ciliophora	Intramacronucleata	Conthreep	Prostomatea	Cryptocaryon	Parasitic
55253c03c68c702474917afb3ae16704	TSAR	Ciliophora	Intramacronucleata	Conthreep	Prostomatea	Cryptocaryon	Parasitic
c6f968020a8f844ccbeb33531dbe595c	TSAR	Ciliophora	Intramacronucleata	Conthreep	Prostomatea	Cryptocaryon	Parasitic
2ad695102b894cafde43ed128c6df652	TSAR	Ciliophora	Intramacronucleata	Conthreep	Prostomatea	Cryptocaryon	Parasitic
447546dbab4b39f21179593d73750b87	TSAR	Ciliophora	Intramacronucleata	Conthreep	Colpodea	Bryometopus	Consumers
ed3d0dde5652137a231a1464027400ff	TSAR	Ciliophora	Intramacronucleata	Conthreep	Colpodea	Platyophrya	Consumers
805fc8e312fd51e4209ab3fef93167ff	TSAR	Ciliophora	Intramacronucleata	Conthreep	Colpodea	Platyophrya	Consumers
fb214e8f8edecca4625d0bccc59a9a82	TSAR	Ciliophora	Intramacronucleata	Conthreep	Colpodea	Platyophrya	Consumers
EU264564.1.1760	TSAR	Ciliophora	Intramacronucleata	Conthreep	Colpodea	Cyrtolophosidida	Consumers
aabd9ebb736dc9706d4a0ae8e8023917	TSAR	Ciliophora	Intramacronucleata	Conthreep	Colpodea	Cyrtolophosis	Consumers
8187ec06e46cada085f496e1d8e93e8a	TSAR	Ciliophora	Intramacronucleata	Conthreep	Colpodea	Cyrtolophosis	Consumers
d989065fc7c72aba9bd8f1aa93fdf7b3	TSAR	Ciliophora	Intramacronucleata	Conthreep	Colpodea	Cyrtolophosis	Consumers
c91c7f69db4d35f2d6fb77e9fd392663	TSAR	Ciliophora	Intramacronucleata	Conthreep	Colpodea	Aristerostoma	Consumers
MH715344.1.1691	TSAR	Ciliophora	Intramacronucleata	Conthreep	Colpodea	Colpodida	Consumers
9950b755124a6d3c21bbb26e4c823e7b	TSAR	Ciliophora	Intramacronucleata	Conthreep	Colpodea	Pseudoplatyophrya	Consumers
EF023322.1.1774	TSAR	Ciliophora	Intramacronucleata	Conthreep	Colpodea	NA	Consumers
72df8caf7990367e998206635faa681d	TSAR	Ciliophora	Intramacronucleata	Conthreep	Prostomatea	Prorodon	Consumers
730af2b881ee263d27415cc48a6ef614	TSAR	Ciliophora	Intramacronucleata	Conthreep	Prostomatea	Prorodon	Consumers
a0efbe62cddeb70b9417c8b527b19420	TSAR	Ciliophora	Intramacronucleata	Conthreep	Prostomatea	Prorodon	Consumers
b6c5833806ee44d9985cdf3ea7adeb85	TSAR	Ciliophora	Intramacronucleata	Conthreep	Prostomatea	Prorodon	Consumers
3d0178baff9ef13816788ba15e7fca49	TSAR	Ciliophora	Intramacronucleata	Conthreep	Prostomatea	Prorodon	Consumers
6624412a6e0f9f1d9ef90453f2b4be87	TSAR	Ciliophora	Intramacronucleata	Conthreep	Prostomatea	Prorodon	Consumers
cee4e71e88664eabb599b66645425dc5	TSAR	Ciliophora	Intramacronucleata	Conthreep	Prostomatea	Prorodon	Consumers
8765cabb59cca96cadac6c1e4aa9387b	TSAR	Ciliophora	Intramacronucleata	Conthreep	Prostomatea	Prorodon	Consumers
cfa837acd64f85dc7e1ded6444bfbb24	TSAR	Ciliophora	Intramacronucleata	Conthreep	Prostomatea	Prorodon	Consumers
3d2d28c83a07a2d26872221a1004f02f	TSAR	Ciliophora	Intramacronucleata	Conthreep	Prostomatea	Prorodon	Consumers
8f6f0ab91d65e7e81226684fcc22760e	TSAR	Ciliophora	Intramacronucleata	Conthreep	Prostomatea	Prorodon	Consumers
841affa26aa84847111cbffe45e975bd	TSAR	Ciliophora	Intramacronucleata	Conthreep	Prostomatea	Prorodon	Consumers
c8421eb98917f90e2eeec75bcad32a8b	TSAR	Ciliophora	Intramacronucleata	Conthreep	Prostomatea	Prorodon	Consumers
d783eb19c26f576ea2c29e1528a0d2d3	TSAR	Ciliophora	Intramacronucleata	Conthreep	Prostomatea	Prorodon	Consumers
37c8c434476220660e14f856da7c35b9	TSAR	Ciliophora	Intramacronucleata	Conthreep	Prostomatea	Prorodon	Consumers
a793bf18e4c96df56d2804e1a76db315	TSAR	Ciliophora	Intramacronucleata	Conthreep	Prostomatea	Prorodon	Consumers
7ab452e626f790144e0c9fc3da2e83ee	TSAR	Ciliophora	Intramacronucleata	Conthreep	Prostomatea	Prorodon	Consumers
a8170ba8689e4426db718e76d6e6a1a0	TSAR	Ciliophora	Intramacronucleata	Conthreep	Prostomatea	Prorodon	Consumers
8eb7c52119005aafecc6f88c256bcb9f	TSAR	Ciliophora	Intramacronucleata	Conthreep	Nassophorea	Nassophorea	Consumers
f956687b0e1f76f6ca91786c8d847e52	TSAR	Ciliophora	Intramacronucleata	Conthreep	Nassophorea	Nassophorea	Consumers
3247891ee35286805e7f06bfc066b89a	TSAR	Ciliophora	Intramacronucleata	Conthreep	Phyllopharyngea	Cyrtophoria	Consumers
643a2a03f3473da75224e1a014458280	TSAR	Ciliophora	Intramacronucleata	Conthreep	Phyllopharyngea	NA	Consumers
b06f8f82e6395394fbca20b33f21b4cd	TSAR	Ciliophora	Intramacronucleata	Conthreep	Phyllopharyngea	Phascolodon	Consumers
bb16ead52d58808b3f34296eb97d7a69	TSAR	Ciliophora	Intramacronucleata	Conthreep	Phyllopharyngea	Phascolodon	Consumers
454da8a1a0431300af225440b0b52c8c	TSAR	Ciliophora	Intramacronucleata	Conthreep	Phyllopharyngea	Cyrtophoria	Consumers
4c3286fb0926ed3448fdb3ade5133fff	TSAR	Ciliophora	Intramacronucleata	Conthreep	Phyllopharyngea	Cyrtophoria	Consumers
d4610231d887836a62a512a76165fbf9	TSAR	Ciliophora	Intramacronucleata	Conthreep	Phyllopharyngea	Cyrtophoria	Consumers
24321ed66b1b75e3241ecf0f53866510	TSAR	Ciliophora	Intramacronucleata	Conthreep	Phyllopharyngea	Suctoria	Consumers
faeba5ee659a9fec8226a6fefd7dde9c	TSAR	Ciliophora	Intramacronucleata	Conthreep	Phyllopharyngea	Suctoria	Consumers
32548bda78a88a973fa30013760ba5ce	TSAR	Ciliophora	Intramacronucleata	Conthreep	Phyllopharyngea	Suctoria	Consumers
8ecde2197ffc01e4f0538f6c46725390	TSAR	Ciliophora	Intramacronucleata	Conthreep	Phyllopharyngea	Suctoria	Consumers
2979f8a7f6309935a46034d7c7ea6f33	TSAR	Ciliophora	Intramacronucleata	Conthreep	Phyllopharyngea	NA	Consumers
61d1734d1474e2710fc7699d320e33fc	TSAR	Ciliophora	Intramacronucleata	Conthreep	Phyllopharyngea	Suctoria	Consumers
cff4e7affcbff0fe630e717a57f6094d	TSAR	Ciliophora	Intramacronucleata	Conthreep	Phyllopharyngea	Suctoria	Consumers
6f9bf1f1914e1cf9138e244401c3e1a2	TSAR	Ciliophora	Intramacronucleata	Conthreep	Phyllopharyngea	Suctoria	Consumers
26729a4f6f20c5003bb2beee5fa157c6	TSAR	Ciliophora	Intramacronucleata	Conthreep	Phyllopharyngea	NA	Consumers
a0793d54a6877819912aea1588c5c291	TSAR	Ciliophora	Intramacronucleata	Conthreep	Phyllopharyngea	Suctoria	Consumers
4e427e8057e6b71e3cedd48d7a08c27b	TSAR	Ciliophora	Intramacronucleata	Conthreep	Phyllopharyngea	Heliophrya	Consumers
ffc229f9e1a74a276a195ede86797afd	TSAR	Ciliophora	Intramacronucleata	Conthreep	Phyllopharyngea	Heliophrya	Consumers
c19e87dc82e90fe472b641dcf0b53489	TSAR	Ciliophora	Intramacronucleata	Conthreep	Prostomatea	NA	Consumers
f2433b99cfc49ab9e094df62632055bf	TSAR	Ciliophora	Intramacronucleata	Conthreep	Prostomatea	NA	Consumers
KP970237.1.1640	TSAR	Ciliophora	Postciliodesmatophora	Heterotrichea	Heterotrichea	Peritromus	Consumers
HM140405.1.1721	TSAR	Ciliophora	Postciliodesmatophora	Heterotrichea	Heterotrichea	Anigsteinia	Consumers
ce15c72b6f4587d1282a5c6e237ab565	TSAR	Ciliophora	Postciliodesmatophora	Heterotrichea	Heterotrichea	Spirostomum	Consumers
FJ998027.1.1718	TSAR	Ciliophora	Postciliodesmatophora	Heterotrichea	Heterotrichea	Spirostomum	Consumers
357bb86597cbdd0f2339235c3e3639ef	TSAR	Ciliophora	Postciliodesmatophora	Heterotrichea	Heterotrichea	Spirostomum	Consumers
339060b693f3991c3d84eda631d49d62	TSAR	Ciliophora	Postciliodesmatophora	Heterotrichea	Heterotrichea	Spirostomum	Consumers
88156bfa893fb728d85de8f1ebe8086a	TSAR	Ciliophora	Postciliodesmatophora	Heterotrichea	Heterotrichea	Spirostomum	Consumers
KX119518.1.1683	TSAR	Ciliophora	Postciliodesmatophora	Heterotrichea	Heterotrichea	Spirostomum	Consumers
6f2a9a3a60e5a4aeb74ae3b9919e14ca	TSAR	Ciliophora	Postciliodesmatophora	Heterotrichea	Heterotrichea	Spirostomum	Consumers
MH819559.1.1688	TSAR	Ciliophora	Postciliodesmatophora	Heterotrichea	Heterotrichea	Heterotrichea	Consumers
JN627438.1.1652	TSAR	Ciliophora	Postciliodesmatophora	Heterotrichea	Heterotrichea	Blepharisma	Consumers
79a1ff70bbcb33a12634f3bf0ee7b7d7	TSAR	Ciliophora	Postciliodesmatophora	Heterotrichea	Heterotrichea	Stentor	Consumers
1d33d3dca91f8ed934122b0f14862e8e	TSAR	Ciliophora	Postciliodesmatophora	Heterotrichea	Heterotrichea	Stentor	Consumers
AF357913.1.1727	TSAR	Ciliophora	Postciliodesmatophora	Heterotrichea	Heterotrichea	Stentor	Consumers
L31517.1.1680	TSAR	Ciliophora	Postciliodesmatophora	Heterotrichea	Heterotrichea	Heterotrichea	Consumers
166c087bd1f08f8fa7c65816d106ce35	TSAR	Ciliophora	Postciliodesmatophora	Heterotrichea	Heterotrichea	Heterotrichea	Consumers
CVLX01008814.165.1821	TSAR	Ciliophora	Postciliodesmatophora	Heterotrichea	Heterotrichea	Condylostoma	Consumers
EU880597.1.1707	TSAR	Ciliophora	Intramacronucleata	Spirotrichea	Euplotia	Aspidisca	Consumers
JX025169.1.1662	TSAR	Ciliophora	Intramacronucleata	Spirotrichea	Euplotia	Aspidisca	Consumers
1e7ea9bc059af9a3ae441ddbbaed33a9	TSAR	Ciliophora	Intramacronucleata	Conthreep	Oligohymenophorea	Cothurnia	Consumers
1c03f748101b58c4e00db08672c4baa4	TSAR	Ciliophora	Intramacronucleata	Conthreep	Oligohymenophorea	Peritrichia	Consumers
60610aa952c5b11395a06098c3221c1a	TSAR	Ciliophora	Intramacronucleata	Conthreep	Oligohymenophorea	Vorticella	Consumers
KF141789.1.1728	TSAR	Ciliophora	Intramacronucleata	Conthreep	Oligohymenophorea	Vorticella	Consumers
a4aad37938825528f23f3075b24876f4	TSAR	Ciliophora	Intramacronucleata	Conthreep	Oligohymenophorea	Vorticella	Consumers
71b7592998f354e5e6622f85bb47905a	TSAR	Ciliophora	Intramacronucleata	Conthreep	Oligohymenophorea	Vorticella	Consumers
cdeaec98f185df36b582636697b8b681	TSAR	Ciliophora	Intramacronucleata	Conthreep	Oligohymenophorea	Vorticella	Consumers
KT201577.1.1688	TSAR	Ciliophora	Intramacronucleata	Conthreep	Oligohymenophorea	Peritrichia	Consumers
4366836602aa56126eba65960e4a7a3b	TSAR	Ciliophora	Intramacronucleata	Conthreep	Oligohymenophorea	NA	Consumers
JX457442.1.1494	TSAR	Ciliophora	Intramacronucleata	Conthreep	Oligohymenophorea	Pseudovorticella	Consumers
KM222116.1.1585	TSAR	Ciliophora	Intramacronucleata	Conthreep	Oligohymenophorea	Pseudovorticella	Consumers
KU363277.1.1461	TSAR	Ciliophora	Intramacronucleata	Conthreep	Oligohymenophorea	Pseudovorticella	Consumers
18742bba0e94e5e2d6da42149e74ab5f	TSAR	Ciliophora	Intramacronucleata	Conthreep	Oligohymenophorea	NA	Consumers
477f0b870cbc042dbb8dea3fd25bcf84	TSAR	Ciliophora	Intramacronucleata	Conthreep	Oligohymenophorea	Zoothamnium	Consumers
ccf817757d3ed8a44558fcd804778bfa	TSAR	Ciliophora	Intramacronucleata	Conthreep	Oligohymenophorea	Zoothamnium	Consumers
JX178767.1.1731	TSAR	Ciliophora	Intramacronucleata	Conthreep	Oligohymenophorea	Zoothamnium	Consumers
KU363274.1.1462	TSAR	Ciliophora	Intramacronucleata	Conthreep	Oligohymenophorea	Zoothamnium	Consumers
AF401523.1.1728	TSAR	Ciliophora	Intramacronucleata	Conthreep	Oligohymenophorea	Zoothamnium	Consumers
fb37f49755b8252cb50d17af1a908aee	TSAR	Ciliophora	Intramacronucleata	Conthreep	Oligohymenophorea	Zoothamnium	Consumers
AB901564.1.1732	TSAR	Ciliophora	Intramacronucleata	Conthreep	Oligohymenophorea	Telotrochidium	Consumers
01ad7fcc791190d3d957ae42477c37a1	TSAR	Ciliophora	Intramacronucleata	Conthreep	Oligohymenophorea	NA	Consumers
DQ868355.1.1652	TSAR	Ciliophora	Intramacronucleata	Conthreep	Oligohymenophorea	Zoothamnium	Consumers
9660753edf61aea15a670b90e3c0dcbb	TSAR	Ciliophora	Intramacronucleata	Conthreep	Oligohymenophorea	Zoothamnium	Consumers
KY675170.1.1627	TSAR	Ciliophora	Intramacronucleata	Conthreep	Oligohymenophorea	Zoothamnium	Consumers
49593903260509bd6df588a6b29814d3	TSAR	Ciliophora	Intramacronucleata	Conthreep	Oligohymenophorea	Zoothamnium	Consumers
KU870461.1.1729	TSAR	Ciliophora	Intramacronucleata	Conthreep	Oligohymenophorea	Zoothamnium	Consumers
KY675161.1.1651	TSAR	Ciliophora	Intramacronucleata	Conthreep	Oligohymenophorea	Zoothamnium	Consumers
KY675156.1.1626	TSAR	Ciliophora	Intramacronucleata	Conthreep	Oligohymenophorea	Zoothamnium	Consumers
AB902048.1.1730	TSAR	Ciliophora	Intramacronucleata	Conthreep	Oligohymenophorea	Telotrochidium	Consumers
166e1e58747282dd2626231d925add3d	TSAR	Ciliophora	Intramacronucleata	Conthreep	Oligohymenophorea	Peritrichia	Consumers
JN120205.1.1541	TSAR	Ciliophora	Intramacronucleata	Conthreep	Oligohymenophorea	Opisthonecta	Consumers
99e02917702d142b8a3be4443e7d38b4	TSAR	Ciliophora	Intramacronucleata	Conthreep	Oligohymenophorea	NA	Consumers
da164dd32360918e0f23cee024e06dc9	TSAR	Ciliophora	Intramacronucleata	Conthreep	Oligohymenophorea	NA	Consumers
bc0518614304abbb956ad5f3f040b290	TSAR	Ciliophora	Intramacronucleata	Conthreep	Oligohymenophorea	NA	Consumers
7dcb5ccf9b8b1d7dc54afd1e74d37d25	TSAR	Ciliophora	Intramacronucleata	Conthreep	Oligohymenophorea	Vaginicola	Consumers
7faf4d68e0e209ba5dd0c5ab858a1cdf	TSAR	Ciliophora	Intramacronucleata	Conthreep	Oligohymenophorea	NA	Consumers
f6b88ad6df2c76f8bc8010b55448a824	TSAR	Ciliophora	Intramacronucleata	Conthreep	Oligohymenophorea	NA	Consumers
592632c7f0e414d6f14f5c9fac5f8002	TSAR	Ciliophora	Intramacronucleata	Conthreep	Oligohymenophorea	Cothurnia	Consumers
805314ae9fd4ed43c3fd96a7800a2fdc	TSAR	Ciliophora	Intramacronucleata	Conthreep	Oligohymenophorea	NA	Consumers
49bbbb61f1c2c6aec552d99759694601	TSAR	Ciliophora	Intramacronucleata	Conthreep	Oligohymenophorea	Cothurnia	Consumers
dfd2485b2876ceb0ae20a482185c929b	TSAR	Ciliophora	Intramacronucleata	Litostomatea	Haptoria	Apobryophyllum	Consumers
fabf8cbe67c12518378afab3e9967977	TSAR	Ciliophora	Intramacronucleata	Litostomatea	Haptoria	Apobryophyllum	Consumers
623f75a0850871e543b02ed50f43f04c	TSAR	Ciliophora	Intramacronucleata	Litostomatea	Haptoria	NA	Consumers
0167110f29bef7354a9e2105860a9f0a	TSAR	Ciliophora	Intramacronucleata	Litostomatea	Haptoria	Chaenea	Consumers
f6a783240e46a5b85e367ef414d0593b	TSAR	Ciliophora	Intramacronucleata	Litostomatea	Haptoria	NA	Consumers
5f91c5e9c2a9860e0ac35e4341861f53	TSAR	Ciliophora	Intramacronucleata	Litostomatea	Haptoria	NA	Consumers
fc73697f65e607d707b295b6ec2c1d34	TSAR	Ciliophora	Intramacronucleata	Litostomatea	Haptoria	NA	Consumers
9e351fde839b50f3328c7b5e0c085f68	TSAR	Ciliophora	Intramacronucleata	Litostomatea	Haptoria	NA	Consumers
f7a2ab2326283915672a04168995eb70	TSAR	Ciliophora	Intramacronucleata	Litostomatea	Haptoria	NA	Consumers
075030839ecb5829fd4dbbededf6c925	TSAR	Ciliophora	Intramacronucleata	Litostomatea	Haptoria	Loxophyllum	Consumers
7e48ed020bbda075bfc37718575b81e0	TSAR	Ciliophora	Intramacronucleata	Litostomatea	Haptoria	NA	Consumers
FJ875148.1.1636	TSAR	Ciliophora	Intramacronucleata	Litostomatea	Haptoria	Loxophyllum	Consumers
8eea03a8687474983f17677c79ccffdc	TSAR	Ciliophora	Intramacronucleata	Litostomatea	Haptoria	NA	Consumers
KF871282.1.1591	TSAR	Ciliophora	Intramacronucleata	Litostomatea	Haptoria	Hemiophrys	Consumers
93d0ed14daf0f7e10a59974952c56e1e	TSAR	Ciliophora	Intramacronucleata	Litostomatea	Haptoria	NA	Consumers
1dba0f8dd20efc2416325c50d348e140	TSAR	Ciliophora	Intramacronucleata	Litostomatea	Haptoria	Loxophyllum	Consumers
54e4af537f445e26ef28a30a9c089ad0	TSAR	Ciliophora	Intramacronucleata	Litostomatea	Haptoria	Epiphyllum	Consumers
AB505480.1.1557	TSAR	Ciliophora	Intramacronucleata	Litostomatea	Haptoria	Epiphyllum	Consumers
36a874ad50df6a3b94aea6f0fda8ffff	TSAR	Ciliophora	Intramacronucleata	Litostomatea	Haptoria	NA	Consumers
885121bff43c940cf07f409269d6f4cf	TSAR	Ciliophora	Intramacronucleata	Litostomatea	Haptoria	Loxophyllum	Consumers
0a251c2122347b8cc67128459e145d50	TSAR	Ciliophora	Intramacronucleata	Litostomatea	Haptoria	Loxophyllum	Consumers
8aebb7739fd24bfafb23a39481916756	TSAR	Ciliophora	Intramacronucleata	Litostomatea	Haptoria	NA	Consumers
59984f48abc1c0fd7698756f91b79e25	TSAR	Ciliophora	Intramacronucleata	Litostomatea	Haptoria	Litonotus	Consumers
e3acd144b46f6c3b11355d5d460be9a7	TSAR	Ciliophora	Intramacronucleata	Litostomatea	Haptoria	Litonotus	Consumers
AB505479.1.1546	TSAR	Ciliophora	Intramacronucleata	Litostomatea	Haptoria	Litonotus	Consumers
a5c7105d2fdd5f755c35e56695ef6b84	TSAR	Ciliophora	Intramacronucleata	Litostomatea	Haptoria	NA	Consumers
2d01cb6cc7b944df5224fdef8643f2c7	TSAR	Ciliophora	Intramacronucleata	Litostomatea	Haptoria	Haptoria	Consumers
39e75ca7b3b01f096f6cda2dcb672dd5	TSAR	Ciliophora	Intramacronucleata	Litostomatea	Haptoria	Haptoria	Consumers
9cd8b51ef59f76867a72cf3a386c30d0	TSAR	Ciliophora	Intramacronucleata	Litostomatea	Haptoria	Haptoria	Consumers
4e457768020ed58ef0c8d32f282e3ab8	TSAR	Ciliophora	Intramacronucleata	Litostomatea	Haptoria	Haptoria	Consumers
7b9fcac7ab9a69bbb10a2cce48980d9a	TSAR	Ciliophora	Intramacronucleata	Litostomatea	Haptoria	Haptoria	Consumers
609be1ee5f8d73b4dcb3282ecb0cecaf	TSAR	Ciliophora	Intramacronucleata	Litostomatea	Haptoria	NA	Consumers
938bec956a9ffcabf230dec83e0ccd66	TSAR	Ciliophora	Intramacronucleata	Litostomatea	Haptoria	NA	Consumers
319d0c74e50562c90db03328e838955f	TSAR	Ciliophora	Intramacronucleata	Litostomatea	Haptoria	NA	Consumers
aef98bac1ce6c9f55fa3352467dc961d	TSAR	Ciliophora	Intramacronucleata	Litostomatea	Haptoria	NA	Consumers
1470498b4d6b91e65768a2c6976a19ca	TSAR	Ciliophora	Intramacronucleata	Litostomatea	Haptoria	Haptoria	Consumers
f76dd00defde527781ca6b24465c2a90	TSAR	Ciliophora	Intramacronucleata	Litostomatea	Haptoria	Haptoria	Consumers
34e0c4e4ecfe38407f252c0e4bfd3a02	TSAR	Ciliophora	Intramacronucleata	Litostomatea	Haptoria	NA	Consumers
837fd74d39e9449dd2e0858c8f615492	TSAR	Ciliophora	Intramacronucleata	Litostomatea	Haptoria	NA	Consumers
0659647c65d008127627a73f4a9eab43	TSAR	Ciliophora	Intramacronucleata	Litostomatea	Haptoria	Haptoria	Consumers
d95b398e4caa0a8ffde56bba4c473b2c	TSAR	Ciliophora	Intramacronucleata	Litostomatea	Haptoria	NA	Consumers
bceeaac1e6039ffc78e5a6ce0d74e320	TSAR	Ciliophora	Intramacronucleata	Litostomatea	Haptoria	Hemiophrys	Consumers
FJ875143.1.1636	TSAR	Ciliophora	Intramacronucleata	Litostomatea	Haptoria	Haptoria	Consumers
b7ee59dc1a171e2c32d45d518d9cd26f	TSAR	Ciliophora	Intramacronucleata	Litostomatea	Haptoria	Loxophyllum	Consumers
FJ870086.1.1637	TSAR	Ciliophora	Intramacronucleata	Litostomatea	Haptoria	Hemiophrys	Consumers
64845bc901cc1a241545fcece13665dd	TSAR	Ciliophora	Intramacronucleata	Litostomatea	Haptoria	Hemiophrys	Consumers
e2c118db947adac3e591b174ea6f3cd5	TSAR	Ciliophora	Intramacronucleata	Litostomatea	Haptoria	Hemiophrys	Consumers
fe181197d0df3ff1ffca7c83d901f440	TSAR	Ciliophora	Intramacronucleata	Litostomatea	Haptoria	Haptoria	Consumers
828f7e19f2d83cbc76c73fbd111aee18	TSAR	Ciliophora	Intramacronucleata	Litostomatea	Haptoria	Haptoria	Consumers
f2cfdf3d25c27e8c706fe55ef16452ed	TSAR	Ciliophora	Intramacronucleata	Litostomatea	Haptoria	NA	Consumers
41ca338ec8f528ac76f9f6a3e19475a1	TSAR	Ciliophora	Intramacronucleata	Litostomatea	Haptoria	NA	Consumers
f0fae940730008d47303ecce39387a7b	TSAR	Ciliophora	Intramacronucleata	Litostomatea	Haptoria	NA	Consumers
3070f3ae4bbe462a83a1d6208ddf83fd	TSAR	Ciliophora	Intramacronucleata	Litostomatea	Litostomatea	Litostomatea	Consumers
KT246083.1.1556	TSAR	Ciliophora	Intramacronucleata	Litostomatea	Litostomatea	Litostomatea	Consumers
3f017ff558354b7160a7a58fe6b1b683	TSAR	Ciliophora	Intramacronucleata	Litostomatea	Haptoria	Haptoria	Consumers
40905c1734ef7592fc7426b7524d9935	TSAR	Ciliophora	Intramacronucleata	Litostomatea	Haptoria	Haptoria	Consumers
4bd14f8c8a815aab031896971d665715	TSAR	Ciliophora	Intramacronucleata	Litostomatea	Haptoria	Haptoria	Consumers
c0915c0b98d4cdff44a0527cc93231fa	TSAR	Ciliophora	Intramacronucleata	Litostomatea	Haptoria	Arcuospathidium	Consumers
19e91f4474cbf42f95c05462f725fd82	TSAR	Ciliophora	Intramacronucleata	Litostomatea	Haptoria	Haptoria	Consumers
JQ723972.1.1595	TSAR	Ciliophora	Intramacronucleata	Litostomatea	Haptoria	Haptoria	Consumers
583aef6eb519f3895814bffa4e416559	TSAR	Ciliophora	Intramacronucleata	Litostomatea	Haptoria	NA	Consumers
6367f834abfbff13d21cfcc1fb437148	TSAR	Ciliophora	Intramacronucleata	Litostomatea	Haptoria	Haptoria	Consumers
4d6b992a832e6874da002babe7e0ef0a	TSAR	Ciliophora	Intramacronucleata	Litostomatea	Haptoria	NA	Consumers
24eebab6a9698ea1a9fad7b32fe7a1a1	TSAR	Ciliophora	Intramacronucleata	Litostomatea	Haptoria	Haptoria	Consumers
1f42677a571887432009fad19ba15c99	TSAR	Ciliophora	Intramacronucleata	Litostomatea	Haptoria	NA	Consumers
ec4a294362edba1a7d397a9ecfaa1119	TSAR	Ciliophora	Intramacronucleata	Litostomatea	Haptoria	NA	Consumers
592c8b2181b89c7ccd3b4072ebaf6941	TSAR	Ciliophora	Intramacronucleata	Litostomatea	Haptoria	NA	Consumers
d5157c497337ed52883a347760a43c59	TSAR	Ciliophora	Intramacronucleata	Litostomatea	Haptoria	NA	Consumers
205bede4ba16fb05874b4c9dad21ce91	TSAR	Ciliophora	Intramacronucleata	Litostomatea	Haptoria	Haptoria	Consumers
3f2bfd0a92e8206dcdb9f4dc1e91d3b3	TSAR	Ciliophora	Intramacronucleata	Litostomatea	Haptoria	Haptoria	Consumers
HM581679.1.1641	TSAR	Ciliophora	Intramacronucleata	Litostomatea	Haptoria	Dileptus	Consumers
26f7cecbdeb45a1bc499a1bc95ee2349	TSAR	Ciliophora	Intramacronucleata	Litostomatea	Haptoria	Haptoria	Consumers
4b59845d97f3749817363693f0f5524f	TSAR	Ciliophora	Intramacronucleata	Litostomatea	Haptoria	Haptoria	Consumers
8401dd07b2972a9035daa53d53e85328	TSAR	Ciliophora	Intramacronucleata	Litostomatea	Haptoria	Haptoria	Consumers
e34785579740c0fa513467f76d6506de	TSAR	Ciliophora	Intramacronucleata	Litostomatea	Haptoria	Haptoria	Consumers
e5c133af2cf910440a91f32eed94e79d	TSAR	Ciliophora	Intramacronucleata	Litostomatea	Haptoria	NA	Consumers
981d6c93f2c2fb47ec409164c3adc090	TSAR	Ciliophora	Intramacronucleata	Litostomatea	Haptoria	Chaenea	Consumers
a8860cd51427908c6224adc0aca6e939	TSAR	Ciliophora	Intramacronucleata	Litostomatea	Haptoria	Chaenea	Consumers
aec4f9fb8158021faeb05886f8daa3c2	TSAR	Ciliophora	Intramacronucleata	Litostomatea	Haptoria	uncultured	Consumers
3701eef6e24c6096c5551402befde29a	TSAR	Ciliophora	Intramacronucleata	Litostomatea	Haptoria	NA	Consumers
483251e68ae9fa46e5c5a4dc80c243db	TSAR	Ciliophora	Intramacronucleata	Litostomatea	Haptoria	NA	Consumers
caa0476433f4628b94746bc4db742a60	TSAR	Ciliophora	Intramacronucleata	Litostomatea	Haptoria	NA	Consumers
7c69b05f7ad4c07cc5b25f018edf9b16	TSAR	Ciliophora	Intramacronucleata	Litostomatea	Haptoria	NA	Consumers
28748c76b7903248699066167fb606b8	TSAR	Ciliophora	Intramacronucleata	Litostomatea	Haptoria	NA	Consumers
4fcf9fc09637f1ae6bab194d0756512d	TSAR	Ciliophora	Intramacronucleata	Litostomatea	Haptoria	NA	Consumers
cbc2c107c0b11a80fd325796210c21de	TSAR	Ciliophora	Intramacronucleata	Litostomatea	Haptoria	NA	Consumers
815f0a4527d3cfcd568db4a2a352c82f	TSAR	Ciliophora	Intramacronucleata	Litostomatea	Haptoria	Haptoria	Consumers
f2f886b3a0354e3c42e9bb7b19602a51	TSAR	Ciliophora	Intramacronucleata	Litostomatea	Haptoria	Phialina	Consumers
206115ee90b860fb7ecbed1fa85378fa	TSAR	Ciliophora	Intramacronucleata	Litostomatea	Haptoria	Haptoria	Consumers
86e7fde05deaf839728a2acc7a7cbc74	TSAR	Ciliophora	Intramacronucleata	Litostomatea	Haptoria	Haptoria	Consumers
0de169821d2e68ffc10426b1950ea144	TSAR	Ciliophora	Intramacronucleata	Litostomatea	Haptoria	NA	Consumers
bc0917a4b1a50853675c24d706227d41	TSAR	Ciliophora	Intramacronucleata	Litostomatea	Haptoria	NA	Consumers
9af5fce163b31e684877f3a45d620e57	TSAR	Ciliophora	Intramacronucleata	Litostomatea	Haptoria	Haptoria	Consumers
796ecd347fba27728911aacc6b9e83dd	TSAR	Ciliophora	Intramacronucleata	Litostomatea	Haptoria	Haptoria	Consumers
78045ecd67263ebe2f3cd4d4cb7f576d	TSAR	Ciliophora	Intramacronucleata	Litostomatea	Haptoria	NA	Consumers
7e4d3c76c226a9a79cfd2b5eaccaaaa3	TSAR	Ciliophora	Intramacronucleata	Litostomatea	Haptoria	NA	Consumers
14a0a102e169e2256248ef18cd3428af	TSAR	Ciliophora	Intramacronucleata	Litostomatea	Haptoria	Phialina	Consumers
e927549aaa08623beb85c3d8f1af7dca	TSAR	Ciliophora	Intramacronucleata	Litostomatea	Haptoria	Phialina	Consumers
cf1666147ec46059a2522ea0b337ae5f	TSAR	Ciliophora	Intramacronucleata	Litostomatea	Haptoria	Haptoria	Consumers
99348f4e180aa305cc9b02cec80bfc37	TSAR	Ciliophora	Intramacronucleata	Litostomatea	Haptoria	Haptoria	Consumers
718662ae71a41098e7808b388510b64f	TSAR	Ciliophora	Intramacronucleata	Litostomatea	Haptoria	NA	Consumers
a414ff43e0d47a5fcbb3db3bd9152695	TSAR	Ciliophora	Intramacronucleata	Litostomatea	Haptoria	NA	Consumers
4f7895e7bdf60060c8698246e0c65a81	TSAR	Ciliophora	Intramacronucleata	Litostomatea	Haptoria	NA	Consumers
1a2e4de5beb8c15051a337affc8c0048	TSAR	Ciliophora	Intramacronucleata	Litostomatea	Haptoria	NA	Consumers
51fe45e0c7e7b1413ee28b139c96c16f	TSAR	Ciliophora	Intramacronucleata	Litostomatea	Haptoria	NA	Consumers
122921a85da5ea8cc01d928931a36c10	TSAR	Ciliophora	Intramacronucleata	Litostomatea	Haptoria	Didinium	Consumers
AY821933.1.1508	TSAR	Ciliophora	Intramacronucleata	Armophorea	Armophorida	Caenomorpha	Consumers
AY821936.1.1487	TSAR	Ciliophora	Intramacronucleata	Armophorea	Armophorida	Caenomorpha	Consumers
KX776457.1.1666	TSAR	Ciliophora	Intramacronucleata	Armophorea	Armophorida	Brachonella	Consumers
bbeaa720efda55d18048319aa175f175	TSAR	Ciliophora	Intramacronucleata	Armophorea	Clevelandellida	Clevelandella	Consumers
036e8ed449a11d95bcbce566fcf21575	TSAR	Ciliophora	Intramacronucleata	Spirotrichea	Euplotia	Euplotes	Consumers
KJ434105.1.1772	TSAR	Ciliophora	Intramacronucleata	Spirotrichea	Euplotia	Euplotes	Consumers
b81dd396972413db89cb28f961975be9	TSAR	Ciliophora	Intramacronucleata	Spirotrichea	Euplotia	Aspidisca	Consumers
7811419e5409c673e0e4967a79a2e415	TSAR	Ciliophora	Intramacronucleata	Spirotrichea	Euplotia	Aspidisca	Consumers
AB505475.1.1663	TSAR	Ciliophora	Intramacronucleata	Spirotrichea	Euplotia	Aspidisca	Consumers
KC582910.1.1757	TSAR	Ciliophora	Intramacronucleata	Spirotrichea	Spirotrichea	Spirotrichea	Consumers
a1ef162283068a7c6924aacbc1222b4b	TSAR	Ciliophora	Intramacronucleata	Spirotrichea	Hypotrichia	NA	Consumers
DQ353850.1.1757	TSAR	Ciliophora	Intramacronucleata	Spirotrichea	Euplotia	Diophrys	Consumers
HQ413692.1.1755	TSAR	Ciliophora	Intramacronucleata	Spirotrichea	Euplotia	Diophrys	Consumers
15ea336611149ac2cda72e17873bd133	TSAR	Ciliophora	Intramacronucleata	Spirotrichea	Euplotia	Diophrys	Consumers
99bfb3d3149832d1fb9bb2a377b681b1	TSAR	Ciliophora	Intramacronucleata	Spirotrichea	Euplotia	Diophrys	Consumers
2c473d7d101988fd01375586cc95ecce	TSAR	Ciliophora	Intramacronucleata	Spirotrichea	Hypotrichia	NA	Consumers
175bf127de604deda7ce75799589494c	TSAR	Ciliophora	Intramacronucleata	Spirotrichea	Hypotrichia	Holosticha	Consumers
d059bbd951d65eca67db928268c05db8	TSAR	Ciliophora	Intramacronucleata	Spirotrichea	Hypotrichia	Holosticha	Consumers
EF194085.1.1763	TSAR	Ciliophora	Intramacronucleata	Spirotrichea	Hypotrichia	Hypotrichia	Consumers
fbcbfa75a5571113572d849e341356cf	TSAR	Ciliophora	Intramacronucleata	Spirotrichea	Hypotrichia	Hypotrichia	Consumers
AF260120.1.1774	TSAR	Ciliophora	Intramacronucleata	Spirotrichea	Hypotrichia	Uronychia	Consumers
5d9d526751615820d2e2865f43598062	TSAR	Ciliophora	Intramacronucleata	Spirotrichea	Hypotrichia	Pseudoamphisiella	Consumers
9ad903ba410a72578bdf81bab345462f	TSAR	Ciliophora	Intramacronucleata	Spirotrichea	Euplotia	Discocephalus	Consumers
LASQ02014678.1830.3587	TSAR	Ciliophora	Intramacronucleata	Spirotrichea	Hypotrichia	Hypotrichia	Consumers
MG995000.1.1687	TSAR	Ciliophora	Intramacronucleata	Spirotrichea	Hypotrichia	Hypotrichia	Consumers
e25af0506c2db81908d4845a24ae5b68	TSAR	Ciliophora	Intramacronucleata	Spirotrichea	Hypotrichia	Hypotrichia	Consumers
FJ461474.1.1769	TSAR	Ciliophora	Intramacronucleata	Spirotrichea	Hypotrichia	Apokeronopsis	Consumers
JQ424832.1.1768	TSAR	Ciliophora	Intramacronucleata	Spirotrichea	Hypotrichia	Metaurostylopsis	Consumers
205a283b7227a295ddba060281777d0c	TSAR	Ciliophora	Intramacronucleata	Spirotrichea	Hypotrichia	Hypotrichia	Consumers
KF306397.1.1769	TSAR	Ciliophora	Intramacronucleata	Spirotrichea	Hypotrichia	Hypotrichia	Consumers
ee47514ffe4728a34df01c5addea5763	TSAR	Ciliophora	Intramacronucleata	Spirotrichea	Hypotrichia	Hypotrichia	Consumers
d5b4d8d7995494fa80eb39f5f3e817aa	TSAR	Ciliophora	Intramacronucleata	Spirotrichea	Hypotrichia	Pseudourostyla	Consumers
FJ775712.1.1776	TSAR	Ciliophora	Intramacronucleata	Spirotrichea	Hypotrichia	Hypotrichia	Consumers
a996b87bc0febc6153e8893498fb365c	TSAR	Ciliophora	Intramacronucleata	Spirotrichea	Hypotrichia	Hypotrichia	Consumers
KY176378.1.1761	TSAR	Ciliophora	Intramacronucleata	Spirotrichea	Hypotrichia	Hypotrichia	Consumers
14b79829827f0525c29f39622cd8b433	TSAR	Ciliophora	Intramacronucleata	Spirotrichea	Hypotrichia	Pseudourostyla	Consumers
7cba358f43fce933306e88e0ea654fb1	TSAR	Ciliophora	Intramacronucleata	Spirotrichea	Hypotrichia	Pseudourostyla	Consumers
f1def45be7d246017fec0a3c12a5b233	TSAR	Ciliophora	Intramacronucleata	Spirotrichea	Hypotrichia	Pseudourostyla	Consumers
7d4976cf21679430c7d7c21753448e20	TSAR	Ciliophora	Intramacronucleata	Spirotrichea	Hypotrichia	Pseudourostyla	Consumers
d080af62e9d8c70b972cc81c547a202a	TSAR	Ciliophora	Intramacronucleata	Spirotrichea	Hypotrichia	NA	Consumers
977d195db961645ea66fa8943980aa27	TSAR	Ciliophora	Intramacronucleata	Spirotrichea	Hypotrichia	NA	Consumers
DQ019318.1.1775	TSAR	Ciliophora	Intramacronucleata	Spirotrichea	Hypotrichia	Pseudourostyla	Consumers
e14a94f3dabf4a713601c670e445cd2f	TSAR	Ciliophora	Intramacronucleata	Spirotrichea	Hypotrichia	Pseudourostyla	Consumers
FJ870099.1.1769	TSAR	Ciliophora	Intramacronucleata	Spirotrichea	Hypotrichia	Protogastrostyla	Consumers
34b644310f8a64dfb01f2c7b62d8d5ef	TSAR	Ciliophora	Intramacronucleata	Spirotrichea	Hypotrichia	Amphisiella	Consumers
KJ704987.1.1771	TSAR	Ciliophora	Intramacronucleata	Spirotrichea	Oligotrichia	NA	Consumers
c80fdec1463142d7cda1c2eac9392044	TSAR	Ciliophora	Intramacronucleata	Spirotrichea	Oligotrichia	Strombidium	Consumers
43b2b63e0bd572e5762101077fbdb850	TSAR	Ciliophora	Intramacronucleata	Spirotrichea	Oligotrichia	Parallelostrombidium	Consumers
EF527115.1.1769	TSAR	Ciliophora	Intramacronucleata	Spirotrichea	Oligotrichia	Parallelostrombidium	Consumers
9001e322f9014be8978998f447e6fc22	TSAR	Ciliophora	Intramacronucleata	Spirotrichea	Oligotrichia	NA	Consumers
AY129030.1.1772	TSAR	Ciliophora	Intramacronucleata	Spirotrichea	Oligotrichia	Strombidium	Consumers
f99ad39f61c0d3881c87688ebf9053f2	TSAR	Ciliophora	Intramacronucleata	Spirotrichea	Oligotrichia	NA	Consumers
7da8e5793441cd6e2aee39ad03b11047	TSAR	Ciliophora	Intramacronucleata	Spirotrichea	Oligotrichia	Spirostrombidium	Consumers
8fd6a7dddf6e33c8a593caf49b1f6eb5	TSAR	Ciliophora	Intramacronucleata	Spirotrichea	Hypotrichia	Hypotrichia	Consumers
91a299ca461ca4b41d203719b57043db	TSAR	Ciliophora	Intramacronucleata	Spirotrichea	Hypotrichia	Hypotrichia	Consumers
KM222096.1.1773	TSAR	Ciliophora	Intramacronucleata	Spirotrichea	Hypotrichia	Hypotrichia	Consumers
fac5590019742d368dbdd46c0981b54c	TSAR	Ciliophora	Intramacronucleata	Spirotrichea	Hypotrichia	Stichotricha	Consumers
16278f3154cf658a136cdd2817c0841c	TSAR	Ciliophora	Intramacronucleata	Spirotrichea	Hypotrichia	NA	Consumers
650ab4de9d9d40d845055066d9e5dbb5	TSAR	Ciliophora	Intramacronucleata	Spirotrichea	Hypotrichia	Strongylidium	Consumers
KC153532.1.1773	TSAR	Ciliophora	Intramacronucleata	Spirotrichea	Hypotrichia	Strongylidium	Consumers
cd39ee523fb0a53180b0521497e28775	TSAR	Ciliophora	Intramacronucleata	Spirotrichea	Hypotrichia	Hypotrichia	Consumers
e4c42d30925f2344af39bc349bf4e3f4	TSAR	Ciliophora	Intramacronucleata	Spirotrichea	Hypotrichia	Hypotrichia	Consumers
7eb106f2bb23dde61d99669c03734857	TSAR	Ciliophora	Intramacronucleata	Spirotrichea	Hypotrichia	NA	Consumers
DQ244023.1.1762	TSAR	Ciliophora	Intramacronucleata	Spirotrichea	Hypotrichia	Halteria	Consumers
MF289777.1.1752	TSAR	Ciliophora	Intramacronucleata	Spirotrichea	Hypotrichia	Hypotrichia	Consumers
LASS02003325.4070.5829	TSAR	Ciliophora	Intramacronucleata	Spirotrichea	Hypotrichia	Hypotrichia	Consumers
c15dbcae91c485576801cc2460ce0dea	TSAR	Ciliophora	Intramacronucleata	Spirotrichea	Hypotrichia	Hypotrichia	Consumers
AF164131.1.1772	TSAR	Ciliophora	Intramacronucleata	Spirotrichea	Hypotrichia	Uroleptus	Consumers
fad7f84f374ba6f621f74202852bbe38	TSAR	Ciliophora	Intramacronucleata	Spirotrichea	Hypotrichia	Uroleptus	Consumers
KY451728.1.1705	TSAR	Ciliophora	Intramacronucleata	Spirotrichea	Hypotrichia	Gonostomum	Consumers
3a27e2819c8113a98bc2bf11f2bf43f3	TSAR	Ciliophora	Intramacronucleata	Spirotrichea	Hypotrichia	Gonostomum	Consumers
DQ057346.1.1769	TSAR	Ciliophora	Intramacronucleata	Spirotrichea	Hypotrichia	NA	Consumers
EF024747.1.1766	TSAR	Ciliophora	Intramacronucleata	Spirotrichea	Hypotrichia	Gonostomum	Consumers
a5144b2a59f27df3cf5286bb75451918	TSAR	Ciliophora	Intramacronucleata	Spirotrichea	Hypotrichia	NA	Consumers
AF164137.1.1779	TSAR	Ciliophora	Intramacronucleata	Spirotrichea	Hypotrichia	Halteria	Consumers
MG994983.1.1682	TSAR	Ciliophora	Intramacronucleata	Spirotrichea	Hypotrichia	Paraurostyla	Consumers
0de97d7a276bc3971bc635ea15063cc7	TSAR	Ciliophora	Intramacronucleata	Spirotrichea	Hypotrichia	NA	Consumers
7a1c9a22cbf291957db164dd2e546b67	TSAR	Ciliophora	Intramacronucleata	Spirotrichea	Hypotrichia	Hypotrichia	Consumers
KX465199.1.1781	TSAR	Ciliophora	Intramacronucleata	Spirotrichea	Hypotrichia	Halteria	Consumers
MG994999.1.1711	TSAR	Ciliophora	Intramacronucleata	Spirotrichea	Hypotrichia	Paruroleptus	Consumers
KF734979.1.1594	TSAR	Ciliophora	Intramacronucleata	Spirotrichea	Hypotrichia	NA	Consumers
bd57ebdaa29d17e6487dd85eb41e3afc	TSAR	Ciliophora	Intramacronucleata	Spirotrichea	Hypotrichia	Uroleptus	Consumers
KU715983.1.1706	TSAR	Ciliophora	Intramacronucleata	Spirotrichea	Hypotrichia	Oxytricha	Consumers
c94e5c43313a8c4d12a55ff135028aa8	TSAR	Ciliophora	Intramacronucleata	Spirotrichea	Hypotrichia	Oxytricha	Consumers
LN870033.1.1733	TSAR	Ciliophora	Intramacronucleata	Spirotrichea	Hypotrichia	Oxytricha	Consumers
MH000390.1.1707	TSAR	Ciliophora	Intramacronucleata	Spirotrichea	Hypotrichia	Oxytricha	Consumers
652ad808cbe240d661766b18ba3e0d27	TSAR	Ciliophora	Intramacronucleata	Spirotrichea	Hypotrichia	NA	Consumers
da339b489c1def5dd58d65cb8549d4ba	TSAR	Ciliophora	Intramacronucleata	Spirotrichea	Hypotrichia	Gonostomum	Consumers
b70bf172fab33c868a4c0e7dada8b20d	TSAR	Ciliophora	Intramacronucleata	Spirotrichea	Choreotrichia	uncultured	Consumers
f9359c2dc14904012852ab4e8f34ea83	TSAR	Ciliophora	Intramacronucleata	Spirotrichea	Choreotrichia	uncultured	Consumers
733c9c4df70228fb8ce5754afb394463	TSAR	Ciliophora	Intramacronucleata	Spirotrichea	Choreotrichia	NA	Consumers
171d624f6ee7a51020fe7d3c6fb4fe67	TSAR	Ciliophora	Intramacronucleata	Spirotrichea	Choreotrichia	Pelagostrobilidium	Consumers
KF130584.1.1717	TSAR	Ciliophora	Intramacronucleata	Spirotrichea	Choreotrichia	Pelagostrobilidium	Consumers
1271cebb2557c0df6906a8554f2890d8	TSAR	Ciliophora	Intramacronucleata	Spirotrichea	Euplotia	Aspidisca	Consumers
3400a1cb1dd9f2eca2fd028cdda3639c	TSAR	Ciliophora	Intramacronucleata	Spirotrichea	Euplotia	Aspidisca	Consumers
3d2f771e0e8a3c139197aadec7bdf339	TSAR	Ciliophora	Intramacronucleata	Spirotrichea	NA	NA	Consumers
71b794c009de0884a3b88393b765259c	TSAR	Ciliophora	Intramacronucleata	Spirotrichea	Euplotia	Aspidisca	Consumers
3f75a3fe1a60909ecc75475497a7a4b2	Amoebozoa	Gracilipodida	Gracilipodida	Gracilipodida	Gracilipodida	Flamella	Consumers
aa8541929198e75a4ffd81d41fe05154	Amoebozoa	Gracilipodida	Gracilipodida	Gracilipodida	Gracilipodida	Flamella	Consumers
e0c53b3c060e2d1901aa2a27f2593d1f	TSAR	Apicomplexa	Conoidasida	Gregarinasina	Eugregarinorida	Hoplorhynchus	Parasitic
60481d2bbdc40d2ebb91516c0dc1f28f	TSAR	Diatomea	Coscinodiscophytina	Coscinodiscophytina	Melosirids	Stephanopyxis	Phototrophic
4c28cae4b2bd1b6ae59f2525be8a608a	TSAR	Diatomea	Mediophyceae	Mediophyceae	Mediophyceae	Arcocellulus	Phototrophic
AY485520.1.1762	TSAR	Diatomea	Mediophyceae	Mediophyceae	Mediophyceae	Arcocellulus	Phototrophic
HQ912569.1.1422	TSAR	Diatomea	Mediophyceae	Mediophyceae	Mediophyceae	NA	Phototrophic
002567a74058d9afffe0d965fe0c1608	TSAR	Diatomea	Mediophyceae	Mediophyceae	Mediophyceae	Odontella	Phototrophic
e4637bd993e2db2a253cdd3d944f6489	TSAR	Diatomea	Mediophyceae	Mediophyceae	Mediophyceae	Mediophyceae	Phototrophic
72d73b6f90bee960a0627bbaed2c5552	TSAR	Diatomea	Mediophyceae	Mediophyceae	Mediophyceae	NA	Phototrophic
AM712618.1.1803	TSAR	Diatomea	Mediophyceae	Mediophyceae	Mediophyceae	Cyclotella	Phototrophic
KT386324.1.1704	TSAR	Diatomea	Mediophyceae	Mediophyceae	Mediophyceae	Cyclotella	Phototrophic
60011f1474869cf516b7f62837e583f7	TSAR	Diatomea	Mediophyceae	Mediophyceae	Mediophyceae	Cyclotella	Phototrophic
KM675687.1.1708	TSAR	Diatomea	Mediophyceae	Mediophyceae	Mediophyceae	Cyclotella	Phototrophic
KJ758236.1.1799	TSAR	Diatomea	Mediophyceae	Mediophyceae	Mediophyceae	Thalassiosira	Phototrophic
DQ093369.1.1806	TSAR	Diatomea	Mediophyceae	Mediophyceae	Mediophyceae	Thalassiosira	Phototrophic
539319d0999566bb29f7fe7a16223ff2	TSAR	Diatomea	Mediophyceae	Mediophyceae	Mediophyceae	Thalassiosira	Phototrophic
HM991689.1.1762	TSAR	Diatomea	Mediophyceae	Mediophyceae	Mediophyceae	Thalassiosira	Phototrophic
d9a537d0724148b4cf7a19b18d8f808e	TSAR	Diatomea	Mediophyceae	Mediophyceae	Mediophyceae	Thalassiosira	Phototrophic
DQ514867.1.1715	TSAR	Diatomea	Mediophyceae	Mediophyceae	Mediophyceae	Thalassiosira	Phototrophic
JQ782078.1.1800	TSAR	Diatomea	Mediophyceae	Mediophyceae	Mediophyceae	Thalassiosira	Phototrophic
7805c55dc1916a4f979b608761dd2b33	TSAR	Diatomea	Mediophyceae	Mediophyceae	Mediophyceae	Skeletonema	Phototrophic
DQ396516.1.1797	TSAR	Diatomea	Mediophyceae	Mediophyceae	Mediophyceae	Skeletonema	Phototrophic
116da4d4ac8e9f06501f74b4704aad50	TSAR	Diatomea	Mediophyceae	Mediophyceae	Mediophyceae	Skeletonema	Phototrophic
66664c0b6f23fb10d9cf4d8ba716ea1a	TSAR	Diatomea	Mediophyceae	Mediophyceae	Mediophyceae	Thalassiosira	Phototrophic
97c4751bf7f28bc20b32b76430c7553d	TSAR	Diatomea	Mediophyceae	Mediophyceae	Mediophyceae	Thalassiosira	Phototrophic
b772e2a826b8416a8a4dfa213a347bab	TSAR	Ochrophyta	Ochrophyta	Ochrophyta	Ochrophyta	Bolidomonas	Phototrophic
KJ577872.1.1632	TSAR	Diatomea	Mediophyceae	Mediophyceae	Mediophyceae	Mediophyceae	Phototrophic
KC309531.1.1655	TSAR	Diatomea	Coscinodiscophytina	Coscinodiscophytina	Coscinodiscophytina	NA	Phototrophic
d600f29fd76f7dd70a3b1d517514840a	TSAR	Diatomea	Coscinodiscophytina	Coscinodiscophytina	Coscinodiscophytina	NA	Phototrophic
d6568d228509d52f596711b1e893e2e2	TSAR	Diatomea	Coscinodiscophytina	Coscinodiscophytina	Melosirids	Aulacoseira	Phototrophic
X85404.1.1848	TSAR	Diatomea	Coscinodiscophytina	Coscinodiscophytina	Melosirids	Aulacoseira	Phototrophic
03e506d3c3e021046d2e68b8a1df948e	TSAR	Diatomea	Coscinodiscophytina	Coscinodiscophytina	Melosirids	Aulacoseira	Phototrophic
X85403.1.1802	TSAR	Diatomea	Coscinodiscophytina	Coscinodiscophytina	Melosirids	Aulacoseira	Phototrophic
JF790991.1.1777	TSAR	Diatomea	Mediophyceae	Mediophyceae	Mediophyceae	Chaetoceros	Phototrophic
08df2612b34471f6d81acd128a298f52	TSAR	Diatomea	Mediophyceae	Mediophyceae	Mediophyceae	Chaetoceros	Phototrophic
28419ca340acc21b9b32ecd02ecd2259	TSAR	Diatomea	Mediophyceae	Mediophyceae	Mediophyceae	Chaetoceros	Phototrophic
be15e52b48b25b3f4bb2524558be0f4a	TSAR	Diatomea	Bacillariophyceae	Bacillariophyceae	Bacillariophyceae	NA	Phototrophic
c508668cef174a59190b61d0ce1912b0	TSAR	Diatomea	Bacillariophyceae	Bacillariophyceae	Bacillariophyceae	NA	Phototrophic
8ba1b896399b4a5034f40f4104820a1c	TSAR	Diatomea	Bacillariophyceae	Bacillariophyceae	Bacillariophyceae	NA	Phototrophic
f0e85a36e13bcb1403a0479ed365a65b	TSAR	Diatomea	Bacillariophyceae	Bacillariophyceae	Bacillariophyceae	NA	Phototrophic
3eb61b2a5cf3b40053fe2bb1f3635f77	TSAR	Diatomea	Mediophyceae	Mediophyceae	Mediophyceae	Chaetoceros	Phototrophic
JF489974.1.1778	TSAR	Diatomea	Mediophyceae	Mediophyceae	Mediophyceae	Chaetoceros	Phototrophic
6f24e2f938713a1bae061e528052955c	TSAR	Diatomea	Mediophyceae	Mediophyceae	Mediophyceae	Chaetoceros	Phototrophic
d23fe3a3e16287c471a56becff1b6149	TSAR	Diatomea	Mediophyceae	Mediophyceae	Mediophyceae	Chaetoceros	Phototrophic
AY216904.1.1796	TSAR	Diatomea	Bacillariophyceae	Bacillariophyceae	Bacillariophyceae	Bacillariophyceae	Phototrophic
5ba220005d388cd8552b9917b824c58a	TSAR	Diatomea	Bacillariophyceae	Bacillariophyceae	Bacillariophyceae	NA	Phototrophic
e7f72b22fb232be7a1013ec1501b1f8b	TSAR	Diatomea	Bacillariophyceae	Bacillariophyceae	Bacillariophyceae	NA	Phototrophic
7bdc34af2e4f0be200843cdff9124cdc	TSAR	Diatomea	Bacillariophyceae	Bacillariophyceae	Bacillariophyceae	Gyrosigma	Phototrophic
8d98b622d4f5c963735ed2f49b3b2ee3	TSAR	Diatomea	Bacillariophyceae	Bacillariophyceae	Bacillariophyceae	Gyrosigma	Phototrophic
66f3cf322ac255288daa6b73b650e613	TSAR	Diatomea	Bacillariophyceae	Bacillariophyceae	Bacillariophyceae	Gyrosigma	Phototrophic
AY180015.1.1715	TSAR	Diatomea	Bacillariophyceae	Bacillariophyceae	Bacillariophyceae	Gyrosigma	Phototrophic
391d64662f9830986706f55015f8bbab	TSAR	Diatomea	Bacillariophyceae	Bacillariophyceae	Bacillariophyceae	NA	Phototrophic
891323049d0d275b3bc9d2f39b4f6cb9	TSAR	Diatomea	Bacillariophyceae	Bacillariophyceae	Bacillariophyceae	NA	Phototrophic
AY179993.1.1882	TSAR	Diatomea	Bacillariophyceae	Bacillariophyceae	Bacillariophyceae	Sellaphora	Phototrophic
cdf92128334f9336ea15fc8fccfd7294	TSAR	Diatomea	Bacillariophyceae	Bacillariophyceae	Bacillariophyceae	Sellaphora	Phototrophic
KJ961679.1.1770	TSAR	Diatomea	Bacillariophyceae	Bacillariophyceae	Bacillariophyceae	Bacillariophyceae	Phototrophic
f234c111cd70d46dde8c21a7387326b4	TSAR	Diatomea	Bacillariophyceae	Bacillariophyceae	Bacillariophyceae	NA	Phototrophic
508b04e50edf08d3311823695386af5c	TSAR	Diatomea	Bacillariophyceae	Bacillariophyceae	Bacillariophyceae	NA	Phototrophic
93b932b9abd535c60e640c53d6f440dc	TSAR	Diatomea	Bacillariophyceae	Bacillariophyceae	Bacillariophyceae	Haslea	Phototrophic
bcc41f7e95ea9c6a5657d69ce294ffe8	TSAR	Diatomea	Bacillariophyceae	Bacillariophyceae	Bacillariophyceae	NA	Phototrophic
5ab0ed56a9810a41c062b7aab9245b11	TSAR	Diatomea	Bacillariophyceae	Bacillariophyceae	Bacillariophyceae	NA	Phototrophic
717b2475cd31046c56aea5b2eceae0a7	TSAR	Diatomea	Bacillariophyceae	Bacillariophyceae	Bacillariophyceae	Bacillariophyceae	Phototrophic
a47aaa0f3f7a260e96e4199bb7702e2e	TSAR	Diatomea	Bacillariophyceae	Bacillariophyceae	Bacillariophyceae	Bacillariophyceae	Phototrophic
64b7a2a9b98b638887e1139aa4abd729	TSAR	Diatomea	Bacillariophyceae	Bacillariophyceae	Bacillariophyceae	NA	Phototrophic
AY082992.1.1780	TSAR	Diatomea	Bacillariophyceae	Bacillariophyceae	Bacillariophyceae	Pinnularia	Phototrophic
2a072c54130d70b5e6b72cd412a4e7a4	TSAR	Diatomea	Bacillariophyceae	Bacillariophyceae	Bacillariophyceae	Pinnularia	Phototrophic
JN418572.1.1706	TSAR	Diatomea	Bacillariophyceae	Bacillariophyceae	Bacillariophyceae	Pinnularia	Phototrophic
cd1bdc03183a5fd30bced94b0b40debf	TSAR	Diatomea	Bacillariophyceae	Bacillariophyceae	Bacillariophyceae	NA	Phototrophic
ba6d743617a67cca8733b0c2c487b7f9	TSAR	Diatomea	Bacillariophyceae	Bacillariophyceae	Bacillariophyceae	Fistulifera	Phototrophic
99ce2a1cc320d3d54aedf2c74dbaa1ad	TSAR	Diatomea	Bacillariophyceae	Bacillariophyceae	Bacillariophyceae	Bacillariophyceae	Phototrophic
6158a125b6ad873121708cadb37516f0	TSAR	Diatomea	Bacillariophyceae	Bacillariophyceae	Bacillariophyceae	NA	Phototrophic
e01dacb9aee286f5db0930205350a5e4	TSAR	Diatomea	Bacillariophyceae	Bacillariophyceae	Bacillariophyceae	NA	Phototrophic
MH063505.1.1606	TSAR	Diatomea	Bacillariophyceae	Bacillariophyceae	Bacillariophyceae	Bacillariophyceae	Phototrophic
3cba793051d45f8ee67b66065969164b	TSAR	Diatomea	Bacillariophyceae	Bacillariophyceae	Bacillariophyceae	Fistulifera	Phototrophic
6cf8f8817107eca2d33d98b7d0719750	TSAR	Diatomea	Bacillariophyceae	Bacillariophyceae	Bacillariophyceae	Bacillariophyceae	Phototrophic
16d4142ac197c8f6af012c58286b8082	TSAR	Diatomea	Bacillariophyceae	Bacillariophyceae	Bacillariophyceae	Bacillariophyceae	Phototrophic
cbf534e2ddd8adedeb3e8a3c6fb6490c	TSAR	Diatomea	Bacillariophyceae	Bacillariophyceae	Bacillariophyceae	Bacillariophyceae	Phototrophic
AB183593.1.1737	TSAR	Diatomea	Bacillariophyceae	Bacillariophyceae	Bacillariophyceae	Bacillariophyceae	Phototrophic
c5994cd4db882f696e12d5f751cbb4f2	TSAR	Diatomea	Bacillariophyceae	Bacillariophyceae	Bacillariophyceae	Bacillariophyceae	Phototrophic
5455dda62f32e40339080885e8ad7e36	TSAR	Diatomea	Bacillariophyceae	Bacillariophyceae	Bacillariophyceae	Bacillariophyceae	Phototrophic
768913525b3bdcfc752aaabe04bd8536	TSAR	Diatomea	Bacillariophyceae	Bacillariophyceae	Bacillariophyceae	Bacillariophyceae	Phototrophic
f022381df7f91c9e346a4a0b249828e8	TSAR	Diatomea	Bacillariophyceae	Bacillariophyceae	Bacillariophyceae	NA	Phototrophic
d2e12b63464afca1fc194ea9a4c25e64	TSAR	Diatomea	Bacillariophyceae	Bacillariophyceae	Bacillariophyceae	NA	Phototrophic
aac2f4fbc8e84275fc0297137909097d	TSAR	Diatomea	Bacillariophyceae	Bacillariophyceae	Bacillariophyceae	NA	Phototrophic
9df9fef5619cffc1414107f5aa3ec0f0	TSAR	Diatomea	Bacillariophyceae	Bacillariophyceae	Bacillariophyceae	Stenopterobia	Phototrophic
ddc0ceb77f604b2b82f6ec17e732d3a0	TSAR	Diatomea	Bacillariophyceae	Bacillariophyceae	Bacillariophyceae	Stenopterobia	Phototrophic
4d2ac68cad4d6435feeb5579a6e19924	TSAR	Diatomea	Bacillariophyceae	Bacillariophyceae	Bacillariophyceae	Stenopterobia	Phototrophic
HQ912416.1.1725	TSAR	Diatomea	Bacillariophyceae	Bacillariophyceae	Bacillariophyceae	Stenopterobia	Phototrophic
KX120771.1.1693	TSAR	Diatomea	Bacillariophyceae	Bacillariophyceae	Bacillariophyceae	Surirella	Phototrophic
56fcb5f2d22d26ecd3d9e97a64a499a8	TSAR	Diatomea	Bacillariophyceae	Bacillariophyceae	Bacillariophyceae	Bacillariophyceae	Phototrophic
89e2314163efa2f16f7068d6a831d38f	TSAR	Diatomea	Bacillariophyceae	Bacillariophyceae	Bacillariophyceae	Bacillariophyceae	Phototrophic
KX120761.1.1713	TSAR	Diatomea	Bacillariophyceae	Bacillariophyceae	Bacillariophyceae	Bacillariophyceae	Phototrophic
5108e92a058038ad8542ff0b007410be	TSAR	Diatomea	Bacillariophyceae	Bacillariophyceae	Bacillariophyceae	NA	Phototrophic
fee9bb21fe8888ea75ef96814ad9808b	TSAR	Diatomea	Bacillariophyceae	Bacillariophyceae	Bacillariophyceae	NA	Phototrophic
KX120699.1.1753	TSAR	Diatomea	Bacillariophyceae	Bacillariophyceae	Bacillariophyceae	Campylodiscus	Phototrophic
6bd6674a73f44e1848839b0c02043213	TSAR	Diatomea	Bacillariophyceae	Bacillariophyceae	Bacillariophyceae	NA	Phototrophic
a2134b43e27bfa7e1c769277eb12bfe7	TSAR	Diatomea	Bacillariophyceae	Bacillariophyceae	Bacillariophyceae	NA	Phototrophic
23e2ee086d54f0c03f26e08f16c10888	TSAR	Diatomea	Bacillariophyceae	Bacillariophyceae	Bacillariophyceae	NA	Phototrophic
be50de6fc7ae5f84343bf5272412f5de	TSAR	Diatomea	Bacillariophyceae	Bacillariophyceae	Bacillariophyceae	NA	Phototrophic
KX120694.1.1724	TSAR	Diatomea	Bacillariophyceae	Bacillariophyceae	Bacillariophyceae	Entomoneis	Phototrophic
0c31ed8da7f92fcd2c5adbabb5ad0997	TSAR	Diatomea	Bacillariophyceae	Bacillariophyceae	Bacillariophyceae	Bacillariophyceae	Phototrophic
98c6a3c356516b048200a95de8e8f92f	TSAR	Diatomea	Bacillariophyceae	Bacillariophyceae	Bacillariophyceae	NA	Phototrophic
55ad0cee7d595db2dd5284468a6d21fe	TSAR	Diatomea	Bacillariophyceae	Bacillariophyceae	Bacillariophyceae	NA	Phototrophic
6197f45702b2f2b37678567d70062564	TSAR	Diatomea	Bacillariophyceae	Bacillariophyceae	Bacillariophyceae	Bacillariophyceae	Phototrophic
52df802ba509ff91cf46d3cac35c5c1d	TSAR	Diatomea	Bacillariophyceae	Bacillariophyceae	Bacillariophyceae	Entomoneis	Phototrophic
EF585586.1.1741	TSAR	Diatomea	Bacillariophyceae	Bacillariophyceae	Bacillariophyceae	NA	Phototrophic
c564506e72cf542422cd80c3d3dc5a20	TSAR	Diatomea	Bacillariophyceae	Bacillariophyceae	Bacillariophyceae	NA	Phototrophic
1ed161d08856b2efa60b916116ec86c0	TSAR	Diatomea	Bacillariophyceae	Bacillariophyceae	Bacillariophyceae	Bacillaria	Phototrophic
AY881968.1.1777	TSAR	Diatomea	Bacillariophyceae	Bacillariophyceae	Bacillariophyceae	Nitzschia	Phototrophic
ce21c01f33a73709981a2a903a600752	TSAR	Diatomea	Bacillariophyceae	Bacillariophyceae	Bacillariophyceae	NA	Phototrophic
1fd7fe846a66c6920edd46649b74733a	TSAR	Diatomea	Bacillariophyceae	Bacillariophyceae	Bacillariophyceae	NA	Phototrophic
AM502040.1.1744	TSAR	Diatomea	Bacillariophyceae	Bacillariophyceae	Bacillariophyceae	Eunotia	Phototrophic
ada8d70a962ab54a7e35200e8ba4318b	TSAR	Diatomea	Bacillariophyceae	Bacillariophyceae	Bacillariophyceae	NA	Phototrophic
KJ961689.1.1782	TSAR	Diatomea	Bacillariophyceae	Bacillariophyceae	Bacillariophyceae	Eunotia	Phototrophic
b2b415a2aefa76c15bbde20d702073d6	TSAR	Diatomea	Coscinodiscophytina	Fragilariales	Fragilariales	Fragilaria	Phototrophic
KU851876.1.1732	TSAR	Diatomea	Coscinodiscophytina	Fragilariales	Fragilariales	NA	Phototrophic
AB436781.1.1769	TSAR	Diatomea	Coscinodiscophytina	Fragilariales	Fragilariales	Fragilariales	Phototrophic
8f07d137f261e9f83b57a16954ee7a34	TSAR	Diatomea	Coscinodiscophytina	Fragilariales	Fragilariales	NA	Phototrophic
76aeccf5cb1ae8d9ebea4c880bf1331d	TSAR	Diatomea	Coscinodiscophytina	Fragilariales	Fragilariales	Staurosira	Phototrophic
AF372749.1.1737	TSAR	Diatomea	Coscinodiscophytina	Fragilariales	Fragilariales	Fragilariales	Phototrophic
a98b8d2d052cef889bf41270bc1f95f6	TSAR	Diatomea	Coscinodiscophytina	Fragilariales	Fragilariales	Licmophora	Phototrophic
707ffa25fdcf3fbccb5f4bf46a7fad94	TSAR	Diatomea	Coscinodiscophytina	Fragilariales	Fragilariales	Licmophora	Phototrophic
KT321975.1.1719	TSAR	Diatomea	Coscinodiscophytina	Fragilariales	Fragilariales	Licmophora	Phototrophic
AM497722.1.1794	TSAR	Diatomea	Coscinodiscophytina	Fragilariales	Fragilariales	Fragilaria	Phototrophic
6baa3592bd769734ccab9c7ccb1885d6	TSAR	Diatomea	Coscinodiscophytina	Fragilariales	Fragilariales	Fragilaria	Phototrophic
MG027314.1.1553	TSAR	Diatomea	Bacillariophyceae	Bacillariophyceae	Bacillariophyceae	Amphora	Phototrophic
b17ac9f9e0f86dc3f7ee4adb39e36a31	TSAR	Diatomea	Bacillariophyceae	Bacillariophyceae	Bacillariophyceae	Amphora	Phototrophic
f71a61b4cad102344fd8ae2894a4c811	TSAR	Diatomea	Bacillariophyceae	Bacillariophyceae	Bacillariophyceae	Amphora	Phototrophic
KY679465.1.1718	TSAR	Diatomea	Coscinodiscophytina	Fragilariales	Fragilariales	Hyalosynedra	Phototrophic
c70170452ab35003d10f3c3eec738a57	TSAR	Diatomea	Coscinodiscophytina	Fragilariales	Fragilariales	NA	Phototrophic
cac4d9368fa417e34eecddedf229c328	TSAR	Diatomea	Coscinodiscophytina	Fragilariales	Fragilariales	Tabularia	Phototrophic
43e480961c19da868b7f4b8eb5b45c53	TSAR	Diatomea	Coscinodiscophytina	Fragilariales	Fragilariales	Plagiostriata	Phototrophic
AB430605.1.1762	TSAR	Diatomea	Coscinodiscophytina	Fragilariales	Fragilariales	Plagiostriata	Phototrophic
45d52eff2f2a1a4d44db7f2c28926c56	TSAR	Diatomea	Bacillariophyceae	Bacillariophyceae	Bacillariophyceae	Bacillariophyceae	Phototrophic
M87334.22.1763	TSAR	Diatomea	Bacillariophyceae	Bacillariophyceae	Bacillariophyceae	Bacillariophyceae	Phototrophic
d4d10876e0a333b919e9f73ed437452f	TSAR	Diatomea	Bacillariophyceae	Bacillariophyceae	Bacillariophyceae	NA	Phototrophic
b3a686f8f467f8f1e48d4ebae65f0117	TSAR	Diatomea	Bacillariophyceae	Bacillariophyceae	Bacillariophyceae	Nitzschia	Phototrophic
GU385676.1.1744	TSAR	Diatomea	Bacillariophyceae	Bacillariophyceae	Bacillariophyceae	Nitzschia	Phototrophic
AY821973.1.1586	TSAR	Diatomea	Bacillariophyceae	Bacillariophyceae	Bacillariophyceae	Nitzschia	Phototrophic
a698555894d59bbcd31a9435a590396c	TSAR	Diatomea	Bacillariophyceae	Bacillariophyceae	Bacillariophyceae	Bacillariophyceae	Phototrophic
9f77cd4e08f55a342472dcb71d6600ff	TSAR	Diatomea	Bacillariophyceae	Bacillariophyceae	Bacillariophyceae	Nitzschia	Phototrophic
LC192342.1.1486	TSAR	Diatomea	Bacillariophyceae	Bacillariophyceae	Bacillariophyceae	Nitzschia	Phototrophic
2c0329b2b95244d43da8e3cdad127382	TSAR	Diatomea	Bacillariophyceae	Bacillariophyceae	Bacillariophyceae	Nitzschia	Phototrophic
169923213a5b588a6473449769418a12	TSAR	Diatomea	Bacillariophyceae	Bacillariophyceae	Bacillariophyceae	NA	Phototrophic
HQ912589.1.1747	TSAR	Diatomea	Bacillariophyceae	Bacillariophyceae	Bacillariophyceae	Nitzschia	Phototrophic
KC771171.1.1785	TSAR	Diatomea	Bacillariophyceae	Bacillariophyceae	Bacillariophyceae	NA	Phototrophic
278e09a8c3aad9b1f5c1f0642fc6f0d3	TSAR	Diatomea	Bacillariophyceae	Bacillariophyceae	Bacillariophyceae	NA	Phototrophic
KC771166.1.1788	TSAR	Diatomea	Bacillariophyceae	Bacillariophyceae	Bacillariophyceae	NA	Phototrophic
AJ867279.1.1784	TSAR	Diatomea	Bacillariophyceae	Bacillariophyceae	Bacillariophyceae	Nitzschia	Phototrophic
6082ec14b8c560ae0cb7922f5a8c28ba	TSAR	Diatomea	Bacillariophyceae	Bacillariophyceae	Bacillariophyceae	NA	Phototrophic
d980f601005b9a7db124f34cd1936499	TSAR	Diatomea	Bacillariophyceae	Bacillariophyceae	Bacillariophyceae	NA	Phototrophic
39391b29d1586e13fd99abafe65ef9f4	TSAR	Diatomea	Bacillariophyceae	Bacillariophyceae	Bacillariophyceae	Nitzschia	Phototrophic
Y10566.1.1788	TSAR	Diatomea	Bacillariophyceae	Bacillariophyceae	Bacillariophyceae	Nitzschia	Phototrophic
ad7d9385778d4fb1c0173b66043057af	TSAR	Diatomea	Bacillariophyceae	Bacillariophyceae	Bacillariophyceae	NA	Phototrophic
9b6d4c34cb22d1ea05e3b7327a2c7318	TSAR	Diatomea	Bacillariophyceae	Bacillariophyceae	Bacillariophyceae	Cylindrotheca	Phototrophic
GQ468541.1.1704	TSAR	Diatomea	Bacillariophyceae	Bacillariophyceae	Bacillariophyceae	Cylindrotheca	Phototrophic
e9f846fd1064d9a761a619a58efc081f	TSAR	Diatomea	Bacillariophyceae	Bacillariophyceae	Bacillariophyceae	Cylindrotheca	Phototrophic
5da7339303e1aecbfb1396e1e8c4b541	TSAR	Diatomea	Bacillariophyceae	Bacillariophyceae	Bacillariophyceae	Nitzschia	Phototrophic
293fe84e8afe533c89a8842bb8fe4d82	TSAR	Diatomea	Bacillariophyceae	Bacillariophyceae	Bacillariophyceae	NA	Phototrophic
b78edf69f88380884f0f048f6106a3a0	TSAR	Diatomea	Bacillariophyceae	Bacillariophyceae	Bacillariophyceae	NA	Phototrophic
d680827869c3e0d0bf1570a45029998a	TSAR	Diatomea	Bacillariophyceae	Bacillariophyceae	Bacillariophyceae	NA	Phototrophic
01dcd10faac42ff69aae633b03f65a33	TSAR	Diatomea	Bacillariophyceae	Bacillariophyceae	Bacillariophyceae	Navicula	Phototrophic
GU385686.1.1763	TSAR	Diatomea	Bacillariophyceae	Bacillariophyceae	Bacillariophyceae	Navicula	Phototrophic
GQ324977.1.1728	TSAR	Diatomea	Bacillariophyceae	Bacillariophyceae	Bacillariophyceae	Navicula	Phototrophic
GU385623.1.1694	TSAR	Diatomea	Bacillariophyceae	Bacillariophyceae	Bacillariophyceae	Navicula	Phototrophic
KY937692.1.1668	TSAR	Diatomea	Bacillariophyceae	Bacillariophyceae	Bacillariophyceae	Navicula	Phototrophic
1d6d0eb48568fbd9111f6bf3709ce062	TSAR	Diatomea	Bacillariophyceae	Bacillariophyceae	Bacillariophyceae	Navicula	Phototrophic
KJ961665.1.1783	TSAR	Diatomea	Bacillariophyceae	Bacillariophyceae	Bacillariophyceae	Navicula	Phototrophic
e9e99251e7b21c08496af35b32813de2	TSAR	Diatomea	Bacillariophyceae	Bacillariophyceae	Bacillariophyceae	Navicula	Phototrophic
9b6f8b709d1bc26e0d4e1a20baef0a4f	TSAR	Diatomea	Bacillariophyceae	Bacillariophyceae	Bacillariophyceae	Navicula	Phototrophic
cba94294a952e4a5472d8b1fa4ee6b0a	TSAR	Diatomea	Bacillariophyceae	Bacillariophyceae	Bacillariophyceae	Navicula	Phototrophic
b5b179a57e40b9e251a8c4992bc4456d	TSAR	Diatomea	Bacillariophyceae	Bacillariophyceae	Bacillariophyceae	Navicula	Phototrophic
AJ297724.1.1781	TSAR	Diatomea	Bacillariophyceae	Bacillariophyceae	Bacillariophyceae	Navicula	Phototrophic
b7e62c4ddc7fea79c200872aad90e6ca	TSAR	Diatomea	Bacillariophyceae	Bacillariophyceae	Bacillariophyceae	Navicula	Phototrophic
KJ961668.1.1789	TSAR	Diatomea	Bacillariophyceae	Bacillariophyceae	Bacillariophyceae	Navicula	Phototrophic
3dfb25db72bc6e0cb4f44dabf56587ed	TSAR	Diatomea	Bacillariophyceae	Bacillariophyceae	Bacillariophyceae	Navicula	Phototrophic
7954cc85416ddc9dcb92ba7673826991	TSAR	Diatomea	Bacillariophyceae	Bacillariophyceae	Bacillariophyceae	Navicula	Phototrophic
AM501976.1.1745	TSAR	Diatomea	Bacillariophyceae	Bacillariophyceae	Bacillariophyceae	Navicula	Phototrophic
GQ219689.1.1778	TSAR	Diatomea	Bacillariophyceae	Bacillariophyceae	Bacillariophyceae	Navicula	Phototrophic
326b6822185862df9ce2c3837fa5ecb0	TSAR	Diatomea	Bacillariophyceae	Bacillariophyceae	Bacillariophyceae	Navicula	Phototrophic
AM501966.1.1745	TSAR	Diatomea	Bacillariophyceae	Bacillariophyceae	Bacillariophyceae	Navicula	Phototrophic
5fc084bf880e563c0f1ae1362635d980	TSAR	Diatomea	Bacillariophyceae	Bacillariophyceae	Bacillariophyceae	Navicula	Phototrophic
c62868a63b06edb1f25faf06ab84f234	TSAR	Diatomea	Bacillariophyceae	Bacillariophyceae	Bacillariophyceae	Navicula	Phototrophic
1c814f13a2080eab2e2f532994b1509f	TSAR	Diatomea	Bacillariophyceae	Bacillariophyceae	Bacillariophyceae	Navicula	Phototrophic
KU561109.1.1708	TSAR	Diatomea	Bacillariophyceae	Bacillariophyceae	Bacillariophyceae	Navicula	Phototrophic
904517c58b3c2a7b79c1fddad6934d25	TSAR	Diatomea	Bacillariophyceae	Bacillariophyceae	Bacillariophyceae	Navicula	Phototrophic
423d54213e1054fb5aec778450490997	TSAR	Diatomea	Bacillariophyceae	Bacillariophyceae	Bacillariophyceae	Navicula	Phototrophic
HM805044.1.1619	TSAR	Diatomea	Bacillariophyceae	Bacillariophyceae	Bacillariophyceae	Navicula	Phototrophic
150db006bfb8d3d08f0e400b98ea5dba	TSAR	Diatomea	Bacillariophyceae	Bacillariophyceae	Bacillariophyceae	Navicula	Phototrophic
KU561150.1.1705	TSAR	Diatomea	Bacillariophyceae	Bacillariophyceae	Bacillariophyceae	Navicula	Phototrophic
AY179996.1.1787	TSAR	Diatomea	Bacillariophyceae	Bacillariophyceae	Bacillariophyceae	Navicula	Phototrophic
8c9cbb4932f0faa32ad232fde207fca3	TSAR	Diatomea	Bacillariophyceae	Bacillariophyceae	Bacillariophyceae	Navicula	Phototrophic
AJ535152.1.1777	TSAR	Diatomea	Bacillariophyceae	Bacillariophyceae	Bacillariophyceae	Navicula	Phototrophic
GU385629.1.1674	TSAR	Diatomea	Bacillariophyceae	Bacillariophyceae	Bacillariophyceae	Navicula	Phototrophic
KJ961670.1.1760	TSAR	Diatomea	Bacillariophyceae	Bacillariophyceae	Bacillariophyceae	Navicula	Phototrophic
3912c279363953b74655228a3d30f0d6	TSAR	Diatomea	Bacillariophyceae	Bacillariophyceae	Bacillariophyceae	Navicula	Phototrophic
fc2a3bcb40a41cfe400f86f71e1b31b0	TSAR	Diatomea	Bacillariophyceae	Bacillariophyceae	Bacillariophyceae	Navicula	Phototrophic
4f291aed51804cf005b7798bf5edc4ce	TSAR	Diatomea	Bacillariophyceae	Bacillariophyceae	Bacillariophyceae	Navicula	Phototrophic
a4f8112fe6d802f250998ac344c11ac9	TSAR	Diatomea	Bacillariophyceae	Bacillariophyceae	Bacillariophyceae	Navicula	Phototrophic
360a49a74bf6ec86620048995e3cbcbf	TSAR	Diatomea	Bacillariophyceae	Bacillariophyceae	Bacillariophyceae	NA	Phototrophic
3a8192c8e576a0440074d0f8ec670bfa	TSAR	Diatomea	Bacillariophyceae	Bacillariophyceae	Bacillariophyceae	Bacillariophyceae	Phototrophic
5cfda706a0105e405cdeb2fd4de95fd4	TSAR	Diatomea	Bacillariophyceae	Bacillariophyceae	Bacillariophyceae	NA	Phototrophic
02924ec73b0235b064e53db18a6027ea	TSAR	Diatomea	Bacillariophyceae	Bacillariophyceae	Bacillariophyceae	Achnanthes	Phototrophic
HQ912594.1.1747	TSAR	Diatomea	Bacillariophyceae	Bacillariophyceae	Bacillariophyceae	Achnanthes	Phototrophic
d133f13aea3dbf1efe767a8feae0a7bc	TSAR	Diatomea	Bacillariophyceae	Bacillariophyceae	Bacillariophyceae	Lemnicula	Phototrophic
8af7d27e78f0c6321a5cfba9b9ba5e5b	TSAR	Diatomea	Bacillariophyceae	Bacillariophyceae	Bacillariophyceae	NA	Phototrophic
935bee5927afa59827ec6ab16a8599f1	TSAR	Diatomea	Bacillariophyceae	Bacillariophyceae	Bacillariophyceae	Achnanthidium	Phototrophic
LC037434.1.1681	TSAR	Diatomea	Bacillariophyceae	Bacillariophyceae	Bacillariophyceae	Achnanthidium	Phototrophic
e36e5b16b05aadcc494b85bbb0252063	TSAR	Diatomea	Bacillariophyceae	Bacillariophyceae	Bacillariophyceae	Achnanthidium	Phototrophic
KJ658413.1.1613	TSAR	Diatomea	Bacillariophyceae	Bacillariophyceae	Bacillariophyceae	Bacillariophyceae	Phototrophic
KU179133.1.1715	TSAR	Diatomea	Bacillariophyceae	Bacillariophyceae	Bacillariophyceae	Cocconeis	Phototrophic
4d6238c4430129fe5a840f57e55cba9e	TSAR	Diatomea	Bacillariophyceae	Bacillariophyceae	Bacillariophyceae	NA	Phototrophic
32aeb9a28654ad2975760d04079f893e	TSAR	Diatomea	Bacillariophyceae	Bacillariophyceae	Bacillariophyceae	Bacillariophyceae	Phototrophic
42b01a7b7f9043b77e0513724d2cbb29	TSAR	Diatomea	Bacillariophyceae	Bacillariophyceae	Bacillariophyceae	Bacillariophyceae	Phototrophic
8ae1c71ca9d260b1dc1b0e06f729dc21	TSAR	Diatomea	Bacillariophyceae	Bacillariophyceae	Bacillariophyceae	NA	Phototrophic
910d044f559bb053eb4dbc65fef11010	TSAR	Diatomea	Bacillariophyceae	Bacillariophyceae	Bacillariophyceae	Encyonema	Phototrophic
033ffe17c9e6c7ccb8fcca3c1bb8d75b	TSAR	Diatomea	Bacillariophyceae	Bacillariophyceae	Bacillariophyceae	Achnanthidium	Phototrophic
5205f8540b649c7bf0f8d5131d1e8f59	TSAR	Diatomea	Bacillariophyceae	Bacillariophyceae	Bacillariophyceae	Bacillariophyceae	Phototrophic
3e723c21b9080a9997920b401ed0660c	TSAR	Diatomea	Bacillariophyceae	Bacillariophyceae	Bacillariophyceae	NA	Phototrophic
5f243b12b1b48c2a5affb9267c4db85a	TSAR	Diatomea	Coscinodiscophytina	Fragilariales	Fragilariales	Berkeleya	Phototrophic
HF562290.1.1727	TSAR	Diatomea	Bacillariophyceae	Bacillariophyceae	Bacillariophyceae	Frustulia	Phototrophic
b4e5273f1c7249c8838e1dab9c1688c8	TSAR	Diatomea	Bacillariophyceae	Bacillariophyceae	Bacillariophyceae	Frustulia	Phototrophic
8b72d9817337495c59f7af72c1af930c	TSAR	Diatomea	Bacillariophyceae	Bacillariophyceae	Bacillariophyceae	Frustulia	Phototrophic
KJ961671.1.1782	TSAR	Diatomea	Bacillariophyceae	Bacillariophyceae	Bacillariophyceae	Sellaphora	Phototrophic
a8414d9e3a14c91cddaa4410d4dd2be8	TSAR	Diatomea	Bacillariophyceae	Bacillariophyceae	Bacillariophyceae	Sellaphora	Phototrophic
b5500c01a01ab7dcb3410a82ac327828	TSAR	Diatomea	Bacillariophyceae	Bacillariophyceae	Bacillariophyceae	Sellaphora	Phototrophic
09076dd814bd72f61bfca8ba38513496	TSAR	Diatomea	Bacillariophyceae	Bacillariophyceae	Bacillariophyceae	NA	Phototrophic
c5b3e85b7af0274e269e67cef432f0a4	TSAR	Diatomea	Bacillariophyceae	Bacillariophyceae	Bacillariophyceae	NA	Phototrophic
e3e1773190fe92a762df0cafb16c151b	TSAR	Diatomea	Bacillariophyceae	Bacillariophyceae	Bacillariophyceae	Amphora	Phototrophic
KY054964.1.1782	TSAR	Diatomea	Bacillariophyceae	Bacillariophyceae	Bacillariophyceae	Amphora	Phototrophic
0811424e0e5b5ba48b85ad865bed7c52	TSAR	Diatomea	Bacillariophyceae	Bacillariophyceae	Bacillariophyceae	Amphora	Phototrophic
KU561165.1.1689	TSAR	Diatomea	Bacillariophyceae	Bacillariophyceae	Bacillariophyceae	Amphora	Phototrophic
ebbe3d4e0240acda86021ec5a9f2a6e4	TSAR	Diatomea	Bacillariophyceae	Bacillariophyceae	Bacillariophyceae	Amphora	Phototrophic
KX120663.1.1727	TSAR	Diatomea	Bacillariophyceae	Bacillariophyceae	Bacillariophyceae	Amphora	Phototrophic
1df050513efddc76808e33c6f8b8772a	TSAR	Diatomea	Bacillariophyceae	Bacillariophyceae	Bacillariophyceae	Amphora	Phototrophic
MG027312.1.1544	TSAR	Diatomea	Bacillariophyceae	Bacillariophyceae	Bacillariophyceae	Amphora	Phototrophic
KU561198.1.1690	TSAR	Diatomea	Bacillariophyceae	Bacillariophyceae	Bacillariophyceae	Amphora	Phototrophic
MG027335.1.1543	TSAR	Diatomea	Bacillariophyceae	Bacillariophyceae	Bacillariophyceae	Amphora	Phototrophic
485891052e9462ba49504c8dcf4ced1f	TSAR	Diatomea	Bacillariophyceae	Bacillariophyceae	Bacillariophyceae	Amphora	Phototrophic
AJ535158.1.1766	TSAR	Diatomea	Bacillariophyceae	Bacillariophyceae	Bacillariophyceae	Amphora	Phototrophic
FR865481.2.1682	TSAR	Diatomea	Bacillariophyceae	Bacillariophyceae	Bacillariophyceae	Amphora	Phototrophic
KJ961658.1.1764	TSAR	Diatomea	Bacillariophyceae	Bacillariophyceae	Bacillariophyceae	Amphora	Phototrophic
c66da144e07792993a4096dabdc2d591	TSAR	Diatomea	Bacillariophyceae	Bacillariophyceae	Bacillariophyceae	Amphora	Phototrophic
KC222331.1.1679	TSAR	Diatomea	Bacillariophyceae	Bacillariophyceae	Bacillariophyceae	Amphora	Phototrophic
89e9997f6ac501f6ff997db3d34ed564	TSAR	Diatomea	Bacillariophyceae	Bacillariophyceae	Bacillariophyceae	Amphora	Phototrophic
KU561103.1.1689	TSAR	Diatomea	Bacillariophyceae	Bacillariophyceae	Bacillariophyceae	Amphora	Phototrophic
1493816419f61e3d471ae5c7ed3dbe49	TSAR	Diatomea	Bacillariophyceae	Bacillariophyceae	Bacillariophyceae	Amphora	Phototrophic
MG027280.1.1543	TSAR	Diatomea	Bacillariophyceae	Bacillariophyceae	Bacillariophyceae	Amphora	Phototrophic
MG027316.1.1545	TSAR	Diatomea	Bacillariophyceae	Bacillariophyceae	Bacillariophyceae	Amphora	Phototrophic
KY766953.1.1721	TSAR	Diatomea	Bacillariophyceae	Bacillariophyceae	Bacillariophyceae	Amphora	Phototrophic
KF177711.1.1697	TSAR	Diatomea	Bacillariophyceae	Bacillariophyceae	Bacillariophyceae	Amphora	Phototrophic
KF959656.1.1774	TSAR	Diatomea	Bacillariophyceae	Bacillariophyceae	Bacillariophyceae	Sellaphora	Phototrophic
6759423c458f96b461c98d4b771a662e	TSAR	Diatomea	Bacillariophyceae	Bacillariophyceae	Bacillariophyceae	Sellaphora	Phototrophic
f7c92a4a59d621c589ddc7f86659dc80	TSAR	Diatomea	Bacillariophyceae	Bacillariophyceae	Bacillariophyceae	Sellaphora	Phototrophic
KJ961708.1.1779	TSAR	Diatomea	Bacillariophyceae	Bacillariophyceae	Bacillariophyceae	Sellaphora	Phototrophic
b94bdb38c1b0ee952e060c9eda484272	TSAR	Diatomea	Bacillariophyceae	Bacillariophyceae	Bacillariophyceae	Sellaphora	Phototrophic
197c06175c8f39bc59ad54302d4b3757	TSAR	Diatomea	Bacillariophyceae	Bacillariophyceae	Bacillariophyceae	Amphora	Phototrophic
MG027273.1.1558	TSAR	Diatomea	Bacillariophyceae	Bacillariophyceae	Bacillariophyceae	Amphora	Phototrophic
1d4b500b68b5b279c30924654e3fd87b	TSAR	Diatomea	Coscinodiscophytina	Fragilariales	Fragilariales	Ulnaria	Phototrophic
KC736643.1.1689	TSAR	Diatomea	Coscinodiscophytina	Fragilariales	Fragilariales	Ulnaria	Phototrophic
3e443b7ae8de2eb3366b2f67bc8067b3	TSAR	Diatomea	Coscinodiscophytina	Fragilariales	Fragilariales	Ulnaria	Phototrophic
EF465475.1.1782	TSAR	Diatomea	Coscinodiscophytina	Fragilariales	Fragilariales	Ulnaria	Phototrophic
KF177774.1.1713	TSAR	Diatomea	Bacillariophyceae	Bacillariophyceae	Bacillariophyceae	Bacillariophyceae	Phototrophic
aba7ce8bd4727a5ff7eabfbf891c94c7	TSAR	Diatomea	Bacillariophyceae	Bacillariophyceae	Bacillariophyceae	NA	Phototrophic
e4890d520619a15e88c66a304b3a7de5	TSAR	Diatomea	Bacillariophyceae	Bacillariophyceae	Bacillariophyceae	NA	Phototrophic
2ad6503151c2cd43adc5c4bab9809fac	TSAR	Diatomea	Bacillariophyceae	Bacillariophyceae	Bacillariophyceae	NA	Phototrophic
KP708987.1.1660	TSAR	Diatomea	Bacillariophyceae	Bacillariophyceae	Bacillariophyceae	Pseudo-nitzschia	Phototrophic
KT861227.1.1750	TSAR	Diatomea	Bacillariophyceae	Bacillariophyceae	Bacillariophyceae	Nitzschia	Phototrophic
997cb79c291a9f54b9271cd3cd278dd1	TSAR	Diatomea	Bacillariophyceae	Bacillariophyceae	Bacillariophyceae	Nitzschia	Phototrophic
KU561119.1.1703	TSAR	Diatomea	Bacillariophyceae	Bacillariophyceae	Bacillariophyceae	Nitzschia	Phototrophic
a0252c30babbf4a44c98821d2c420bcb	TSAR	Diatomea	Bacillariophyceae	Bacillariophyceae	Bacillariophyceae	Nitzschia	Phototrophic
GU385575.1.1705	TSAR	Diatomea	Bacillariophyceae	Bacillariophyceae	Bacillariophyceae	Nitzschia	Phototrophic
ee634bc3ef8646c8627e4c8285f6c603	TSAR	Diatomea	Bacillariophyceae	Bacillariophyceae	Bacillariophyceae	Nitzschia	Phototrophic
b9e7a0806480a3c0369b3a24202f8fd5	TSAR	Diatomea	Bacillariophyceae	Bacillariophyceae	Bacillariophyceae	Nitzschia	Phototrophic
AJ867277.1.1794	TSAR	Diatomea	Bacillariophyceae	Bacillariophyceae	Bacillariophyceae	Nitzschia	Phototrophic
4b080e46723b9e43fd5e1451016a1ebb	TSAR	Diatomea	Bacillariophyceae	Bacillariophyceae	Bacillariophyceae	Gomphonema	Phototrophic
KJ961663.1.1775	TSAR	Diatomea	Bacillariophyceae	Bacillariophyceae	Bacillariophyceae	Gomphonema	Phototrophic
f8863c1904cb25b08f2f1e1cbd04bdfb	TSAR	Diatomea	Bacillariophyceae	Bacillariophyceae	Bacillariophyceae	Gomphonema	Phototrophic
a450e6dd7e6af1e303f66d4924e41bd4	TSAR	Diatomea	Bacillariophyceae	Bacillariophyceae	Bacillariophyceae	Gomphonema	Phototrophic
16a1cabc8d2950a8c6712a5cb98ab387	TSAR	Diatomea	Bacillariophyceae	Bacillariophyceae	Bacillariophyceae	Gomphonema	Phototrophic
63e69d9507826e2bb956efbd366af678	TSAR	Diatomea	Bacillariophyceae	Bacillariophyceae	Bacillariophyceae	Gomphonema	Phototrophic
ae76df3873f5f38a24efd192cf5a592c	TSAR	Diatomea	Bacillariophyceae	Bacillariophyceae	Bacillariophyceae	Gomphonema	Phototrophic
b8d29ebcce68dfbcf6e329b4883ef3ec	TSAR	Diatomea	Bacillariophyceae	Bacillariophyceae	Bacillariophyceae	Gomphonema	Phototrophic
9215685bea8afc91f57ba5a95784ad06	TSAR	Diatomea	Bacillariophyceae	Bacillariophyceae	Bacillariophyceae	Cymbella	Phototrophic
KJ011630.1.1717	TSAR	Diatomea	Bacillariophyceae	Bacillariophyceae	Bacillariophyceae	Cymbella	Phototrophic
63011e0e266171f8cf0d895dfeadd2fb	TSAR	Diatomea	Bacillariophyceae	Bacillariophyceae	Bacillariophyceae	NA	Phototrophic
0a8010e68f1d99cdbfb0d6774a2e0541	TSAR	Diatomea	Bacillariophyceae	Bacillariophyceae	Bacillariophyceae	NA	Phototrophic
dc3f2b48ad03f5e82c8569e177302c1c	TSAR	Diatomea	Bacillariophyceae	Bacillariophyceae	Bacillariophyceae	NA	Phototrophic
40bb3ff42cff8fa50ce10509a4a2ea02	TSAR	Diatomea	Bacillariophyceae	Bacillariophyceae	Bacillariophyceae	Pleurosigma	Phototrophic
8123e65160264bfca585b6b701a1180c	TSAR	Diatomea	Bacillariophyceae	Bacillariophyceae	Bacillariophyceae	NA	Phototrophic
150c3aeacb9c9a126a9dc49d7e1a8336	TSAR	Diatomea	Bacillariophyceae	Bacillariophyceae	Bacillariophyceae	Pleurosigma	Phototrophic
KC771169.1.1790	TSAR	Diatomea	Bacillariophyceae	Bacillariophyceae	Bacillariophyceae	Pleurosigma	Phototrophic
ca2e12570f86a6ad94979ddfc1189c93	TSAR	Diatomea	Bacillariophyceae	Bacillariophyceae	Bacillariophyceae	Pleurosigma	Phototrophic
1585200c8ceb4347f18bed6f5c952b6c	TSAR	Diatomea	Bacillariophyceae	Bacillariophyceae	Bacillariophyceae	NA	Phototrophic
AF525664.1.1745	TSAR	Diatomea	Bacillariophyceae	Bacillariophyceae	Bacillariophyceae	Pleurosigma	Phototrophic
c3202a42190ae575cc7072d3ee6414c7	TSAR	Diatomea	Bacillariophyceae	Bacillariophyceae	Bacillariophyceae	Pleurosigma	Phototrophic
c8bbfb124896e4dc77a0055b41514fce	TSAR	Diatomea	Bacillariophyceae	Bacillariophyceae	Bacillariophyceae	Pleurosigma	Phototrophic
c7bcaed00d5091392322a2b0028e483f	TSAR	Diatomea	Bacillariophyceae	Bacillariophyceae	Bacillariophyceae	Pleurosigma	Phototrophic
f77d1f80abda8448f30207e2012219df	TSAR	Diatomea	Bacillariophyceae	Bacillariophyceae	Bacillariophyceae	Pleurosigma	Phototrophic
HQ912683.1.1624	TSAR	Diatomea	Mediophyceae	Mediophyceae	Mediophyceae	Terpsinoe	Phototrophic
50517e9b8694684a7c485b23d973c1e0	TSAR	Diatomea	Bacillariophyceae	Bacillariophyceae	Bacillariophyceae	Pinnularia	Phototrophic
JN418571.1.1647	TSAR	Diatomea	Bacillariophyceae	Bacillariophyceae	Bacillariophyceae	Pinnularia	Phototrophic
9b83ab3c47b42a76022b0dc2af1ea0df	TSAR	Diatomea	Bacillariophyceae	Bacillariophyceae	Bacillariophyceae	Pinnularia	Phototrophic
bbb4af9064b2b14dea4523b2b09f676c	TSAR	Diatomea	Bacillariophyceae	Bacillariophyceae	Bacillariophyceae	Pinnularia	Phototrophic
6291566a01905d8c780cdcf791327dd8	TSAR	Diatomea	Bacillariophyceae	Bacillariophyceae	Bacillariophyceae	Pinnularia	Phototrophic
9a22d473cdb14d1fd197ea83ac5af0bd	TSAR	Diatomea	Bacillariophyceae	Bacillariophyceae	Bacillariophyceae	Pinnularia	Phototrophic
JN418576.1.1705	TSAR	Diatomea	Bacillariophyceae	Bacillariophyceae	Bacillariophyceae	Pinnularia	Phototrophic
KT072984.1.1690	TSAR	Diatomea	Bacillariophyceae	Bacillariophyceae	Bacillariophyceae	Pinnularia	Phototrophic
AM501979.1.1735	TSAR	Diatomea	Bacillariophyceae	Bacillariophyceae	Bacillariophyceae	Pinnularia	Phototrophic
905385ad47e3d7859e12621f41495bd2	TSAR	Diatomea	Bacillariophyceae	Bacillariophyceae	Bacillariophyceae	Pinnularia	Phototrophic
0446289079057f1cad52d3b6dfb3e459	TSAR	Diatomea	Bacillariophyceae	Bacillariophyceae	Bacillariophyceae	Pinnularia	Phototrophic
6ccc28c8de24662c91cae8d7056fe171	TSAR	Diatomea	Bacillariophyceae	Bacillariophyceae	Bacillariophyceae	Pinnularia	Phototrophic
9be4a8487bdd7d34fd028508b6da1122	TSAR	Diatomea	Bacillariophyceae	Bacillariophyceae	Bacillariophyceae	Pinnularia	Phototrophic
e091f498c6e5454add6ee4bd912a3113	TSAR	Diatomea	Bacillariophyceae	Bacillariophyceae	Bacillariophyceae	Pinnularia	Phototrophic
fcdc955a08060c41f604df196f294737	TSAR	Diatomea	Bacillariophyceae	Bacillariophyceae	Bacillariophyceae	Pinnularia	Phototrophic
02f02a6d289c1a0efa8e6a79ddb6a898	TSAR	Diatomea	Bacillariophyceae	Bacillariophyceae	Bacillariophyceae	Pinnularia	Phototrophic
27cd8133a5c4192c622c8e205cc50042	TSAR	Diatomea	Bacillariophyceae	Bacillariophyceae	Bacillariophyceae	Pinnularia	Phototrophic
316dabfa9bfd4336f7d1e5ced82135ff	TSAR	Diatomea	Bacillariophyceae	Bacillariophyceae	Bacillariophyceae	Pinnularia	Phototrophic
4779fbf58b7d401bb4fd9b8a373ecf00	TSAR	Diatomea	Bacillariophyceae	Bacillariophyceae	Bacillariophyceae	Pinnularia	Phototrophic
AM502021.1.1737	TSAR	Diatomea	Bacillariophyceae	Bacillariophyceae	Bacillariophyceae	Pinnularia	Phototrophic
a0b3e47027cfd2441add9ad8ba9f5531	TSAR	Diatomea	Bacillariophyceae	Bacillariophyceae	Bacillariophyceae	Pinnularia	Phototrophic
74a78e49882399f4203f52fadab7e10a	TSAR	Diatomea	Bacillariophyceae	Bacillariophyceae	Bacillariophyceae	NA	Phototrophic
HQ912682.1.1649	TSAR	Diatomea	Mediophyceae	Mediophyceae	Mediophyceae	Terpsinoe	Phototrophic
7a146e4cf96889accf2e1a01433cf6d2	TSAR	Diatomea	Bacillariophyceae	Bacillariophyceae	Bacillariophyceae	Neidium	Phototrophic
HQ912583.1.1742	TSAR	Diatomea	Bacillariophyceae	Bacillariophyceae	Bacillariophyceae	Neidium	Phototrophic
cc71a42d565765ec0995796518ffc92e	TSAR	Diatomea	Bacillariophyceae	Bacillariophyceae	Bacillariophyceae	Neidium	Phototrophic
8579f6fbaaa2fd7d49108fa05830e7db	TSAR	Diatomea	Mediophyceae	Mediophyceae	Mediophyceae	Mediophyceae	Phototrophic
AJ535188.1.1803	TSAR	Diatomea	Mediophyceae	Mediophyceae	Mediophyceae	Mediophyceae	Phototrophic
f9dea196745873f90133df34b4608848	TSAR	Ochrophyta	Chrysophyceae	P34.45	P34.45	P34.45	NA
6d6d42d93e49b5473c8a412fa408449d	TSAR	Ochrophyta	Chrysophyceae	Ochromonadales	Ochromonadales	Paraphysomonas	Consumers
JQ967331.1.1655	TSAR	Ochrophyta	Chrysophyceae	Ochromonadales	Ochromonadales	Paraphysomonas	Consumers
Z38025.1.1686	TSAR	Ochrophyta	Chrysophyceae	Ochromonadales	Ochromonadales	Paraphysomonas	Consumers
DQ103808.1.1400	TSAR	Ochrophyta	Chrysophyceae	Ochromonadales	Ochromonadales	Paraphysomonas	Consumers
e162a54d1c704b5afa6d28089880535c	TSAR	Ochrophyta	Chrysophyceae	Ochromonadales	Ochromonadales	Paraphysomonas	Consumers
e348579c1d51f03f7e2ab869d5b4b397	TSAR	Ochrophyta	Chrysophyceae	Synurales	Synurales	NA	NA
6677c4a3f7f76c10f79753cf2eb9396c	TSAR	Ochrophyta	Chrysophyceae	Chrysophyceae	Chrysophyceae	Chrysophyceae	NA
b5a1e40da394275459cd4ee06e26b6e4	TSAR	Ochrophyta	Chrysophyceae	Chrysophyceae	Chrysophyceae	Chrysophyceae	NA
EF527171.1.1555	TSAR	Ochrophyta	Chrysophyceae	Ochromonadales	Ochromonadales	Paraphysomonas	Consumers
0374fb689c286ab38c9b355264d5e29f	TSAR	Ochrophyta	Chrysophyceae	Ochromonadales	Ochromonadales	Paraphysomonas	Consumers
1d55536c201704eac02fe2e7316fd21b	TSAR	Ochrophyta	Chrysophyceae	Ochromonadales	Ochromonadales	Paraphysomonas	Consumers
a6ff3fabc3a04766ba9092d7d2b59936	TSAR	Ochrophyta	Chrysophyceae	Ochromonadales	Ochromonadales	Paraphysomonas	Consumers
ec74eb84866fd3d6e77afe55c78f3685	TSAR	Ochrophyta	Chrysophyceae	Ochromonadales	Ochromonadales	Paraphysomonas	Consumers
583be81766e81ab47f235d3cfb6826ac	TSAR	Ochrophyta	Chrysophyceae	Ochromonadales	Ochromonadales	Paraphysomonas	Consumers
FJ971855.1.1724	TSAR	Ochrophyta	Chrysophyceae	P34.45	P34.45	P34.45	Consumers
6273cfa69b53f5e7252adadc9d89bb68	TSAR	Ochrophyta	Chrysophyceae	P34.45	P34.45	P34.45	NA
c4c5f4fc390b3a4c571320966f4a8910	TSAR	Ochrophyta	Chrysophyceae	P34.45	P34.45	P34.45	NA
AY642705.1.1774	TSAR	Ochrophyta	Chrysophyceae	P34.45	P34.45	P34.45	NA
01d7b445f814febb86f91ce5186d2add	TSAR	Ochrophyta	Chrysophyceae	P34.45	P34.45	P34.45	NA
d76566f648e74e03238d49b4b5c853c5	TSAR	Ochrophyta	Chrysophyceae	P34.45	P34.45	P34.45	NA
AB749151.1.1657	TSAR	Ochrophyta	Chrysophyceae	uncultured	uncultured	uncultured	NA
56b16cac2d788d011ef549cdbe83ea09	TSAR	Ochrophyta	Chrysophyceae	Chrysophyceae	Chrysophyceae	Chrysophyceae	NA
ec07a013548e3916881f24a6ef7e950d	TSAR	Ochrophyta	Chrysophyceae	Chromulinales	Chromulinales	NA	NA
HAFZ01021782.3.1781	TSAR	Ochrophyta	Chrysophyceae	Chromulinales	Chromulinales	Poteriospumella	Consumers
KY887582.1.1777	TSAR	Ochrophyta	Chrysophyceae	Chromulinales	Chromulinales	Poteriospumella	Consumers
d7d9bf7e19e684f5fbfc1bee1c24a54a	TSAR	Ochrophyta	Chrysophyceae	Ochromonadales	Ochromonadales	NA	NA
AB749084.1.1662	TSAR	Ochrophyta	Chrysophyceae	Ochromonadales	Ochromonadales	Ochromonas	Phototrophic
e2f74893797c1e7f0486bce3f1c04783	TSAR	Ochrophyta	Chrysophyceae	Ochromonadales	Ochromonadales	Ochromonas	Phototrophic
GU290068.1.1784	TSAR	Ochrophyta	Chrysophyceae	Ochromonadales	Ochromonadales	Ochromonas	Phototrophic
ad5051523daa487697b47096daf3d089	TSAR	Ochrophyta	Chrysophyceae	Ochromonadales	Ochromonadales	Ochromonas	Phototrophic
b864530b7e1a0724f9bbb695dbe53c2d	TSAR	Ochrophyta	Chrysophyceae	Ochromonadales	Ochromonadales	Ochromonas	Phototrophic
7803e65c7aab796d5d63ab12a24e030d	TSAR	Ochrophyta	Chrysophyceae	Ochromonadales	Ochromonadales	Ochromonas	Phototrophic
ce3f55e6322f8c3472b700d9ac5c6110	TSAR	Ochrophyta	Chrysophyceae	Ochromonadales	Ochromonadales	NA	NA
f72ed2b9578f464db7088fd41fe1f19c	TSAR	Ochrophyta	Chrysophyceae	Ochromonadales	Ochromonadales	Ochromonas	Phototrophic
f6617d3e53c98193c929a1aa2db0a67f	TSAR	Ochrophyta	Chrysophyceae	Ochromonadales	Ochromonadales	Ochromonas	Phototrophic
6c01a7c5fdec654a3336b21ec0093e03	TSAR	Ochrophyta	Chrysophyceae	Ochromonadales	Ochromonadales	Ochromonas	Phototrophic
6f2fdc2d3bf0a7ea36ff9db7a2b1b530	TSAR	Ochrophyta	Chrysophyceae	Ochromonadales	Ochromonadales	Ochromonas	Phototrophic
059da57fe761aee220cb7b3945f77d77	TSAR	Ochrophyta	Chrysophyceae	Chromulinales	Chromulinales	JBNA46	Phototrophic
EF024178.1.1852	TSAR	Ochrophyta	Chrysophyceae	Chromulinales	Chromulinales	JBNA46	Phototrophic
LC222857.1.1682	TSAR	Ochrophyta	Chrysophyceae	Chromulinales	Chromulinales	JBNA46	Phototrophic
6e3e2b703374fa2c12a8025d2bdc6b73	TSAR	Ochrophyta	Chrysophyceae	Chromulinales	Chromulinales	JBNA46	Phototrophic
GU290078.1.1787	TSAR	Ochrophyta	Chrysophyceae	Chromulinales	Chromulinales	JBNA46	Phototrophic
ca299d70ad5d054ad247657436cdaf87	TSAR	Ochrophyta	Chrysophyceae	Chromulinales	Chromulinales	Spumella	Consumers
HAFT01000499.16.1798	TSAR	Ochrophyta	Chrysophyceae	Chromulinales	Chromulinales	Spumella	Consumers
ed3f108058aab25a366d48aff2bf5096	TSAR	Ochrophyta	Chrysophyceae	Chromulinales	Chromulinales	Spumella	Consumers
e2a98336b0191958c8152f96b7abb422	TSAR	Ochrophyta	Chrysophyceae	Chromulinales	Chromulinales	Spumella	Consumers
JQ967332.1.1673	TSAR	Ochrophyta	Chrysophyceae	Chromulinales	Chromulinales	Spumella	Consumers
8054bc5209f9150e4f26f68b531d55ff	TSAR	Ochrophyta	Chrysophyceae	Chromulinales	Chromulinales	Spumella	Consumers
1462292f855b57dd2cdeb9ba9832a258	TSAR	Ochrophyta	Chrysophyceae	Synurales	Synurales	Synura	Phototrophic
9fa8a2a75be196fc5ba822dbe5314d4a	TSAR	Ochrophyta	Chrysophyceae	Synurales	Synurales	Synura	Phototrophic
GU325581.1.1658	TSAR	Ochrophyta	Chrysophyceae	Synurales	Synurales	Synura	Phototrophic
ef8dd0c33046d1e8af01a76c759bf1ea	TSAR	Ochrophyta	Chrysophyceae	Incerta_sedis	Incerta_sedis	Chlamydomyxa	Phototrophic
8b6240bf65cbe0ac037e4be968810c23	TSAR	Ochrophyta	Chrysophyceae	Synurales	Synurales	Mallomonas	Phototrophic
e2f654de137fd9e9ef2b6a4feaa9ae48	TSAR	Ochrophyta	Chrysophyceae	Synurales	Synurales	Mallomonas	Phototrophic
U73232.1.1809	TSAR	Ochrophyta	Chrysophyceae	Synurales	Synurales	Mallomonas	Phototrophic
GU935633.1.1708	TSAR	Ochrophyta	Chrysophyceae	Synurales	Synurales	Mallomonas	Phototrophic
57916b06b25986405f3040b834c49f0b	TSAR	Ochrophyta	Chrysophyceae	Synurales	Synurales	Mallomonas	Phototrophic
U73227.1.1811	TSAR	Ochrophyta	Chrysophyceae	Synurales	Synurales	Mallomonas	Phototrophic
KM817888.1.1695	TSAR	Ochrophyta	Chrysophyceae	Synurales	Synurales	Mallomonas	Phototrophic
fa3b63b5d3bc039f188bef52aba9afa2	TSAR	Ochrophyta	Chrysophyceae	Chrysocapsales	Chrysocapsales	NA	NA
5a7e22f60dd04f74e561931e9c810366	TSAR	Ochrophyta	Chrysophyceae	Ochromonadales	Ochromonadales	Paraphysomonas	Consumers
KJ925518.1.1701	TSAR	Ochrophyta	Chrysophyceae	Ochromonadales	Ochromonadales	Paraphysomonas	Consumers
U73220.1.1805	TSAR	Ochrophyta	Chrysophyceae	Synurales	Synurales	Synura	Phototrophic
083ec3aaba1ebc4c889ed73bfff78e43	TSAR	Ochrophyta	Chrysophyceae	uncultured	uncultured	uncultured	NA
782c4b5f7ff67c796c11524428f28b1b	TSAR	Ochrophyta	Chrysophyceae	uncultured	uncultured	uncultured	NA
9bcc0565ad19ce776e47f6d690702af9	TSAR	Ochrophyta	Chrysophyceae	uncultured	uncultured	uncultured	NA
GU290105.1.1784	TSAR	Ochrophyta	Chrysophyceae	uncultured	uncultured	uncultured	NA
22c150f9a105b779848f1b6f06760ee3	TSAR	Ochrophyta	Chrysophyceae	uncultured	uncultured	uncultured	NA
d2d0201836bf58dd7bf0e23b50c0ee38	TSAR	Ochrophyta	Chrysophyceae	Chromulinales	Chromulinales	NA	NA
AY821972.1.1582	TSAR	Ochrophyta	Chrysophyceae	Chromulinales	Chromulinales	Chrysamoeba	Phototrophic
AF123287.1.1785	TSAR	Ochrophyta	Chrysophyceae	Chromulinales	Chromulinales	Chrysamoeba	Phototrophic
44497d5b3f250e73a88a09fe51c8fc20	TSAR	Ochrophyta	Chrysophyceae	Chromulinales	Chromulinales	Chrysamoeba	Phototrophic
AF123286.1.1783	TSAR	Ochrophyta	Chrysophyceae	Chromulinales	Chromulinales	Chrysamoeba	Phototrophic
37e53638eaea05fa7267f397cac9f108	TSAR	Ochrophyta	Chrysophyceae	Chromulinales	Chromulinales	Oikomonas	Consumers
AY520451.1.1783	TSAR	Ochrophyta	Chrysophyceae	Chromulinales	Chromulinales	Oikomonas	Consumers
AY651071.1.1696	TSAR	Ochrophyta	Chrysophyceae	Chromulinales	Chromulinales	Oikomonas	Consumers
a1471f6bb54c86759e4b2e0151e389e1	TSAR	Ochrophyta	Chrysophyceae	Chromulinales	Chromulinales	Oikomonas	Consumers
09a6d044517c403b14cac073b1484668	TSAR	Ochrophyta	Chrysophyceae	uncultured	uncultured	uncultured	NA
b94f145b624d5d80982da9cfd991f144	TSAR	Ochrophyta	Chrysophyceae	uncultured	uncultured	uncultured	NA
75f93fbd6274bc143f8ebc597186cd75	TSAR	Ochrophyta	Chrysophyceae	uncultured	uncultured	uncultured	NA
AB749076.1.1661	TSAR	Ochrophyta	Chrysophyceae	uncultured	uncultured	uncultured	NA
07ece101abc5536bbd591c9512eb475a	TSAR	Ochrophyta	Chrysophyceae	Ochromonadales	Ochromonadales	Ochromonas	Phototrophic
00dd422bd602744d05a9ebe608d05e01	TSAR	Ochrophyta	Chrysophyceae	uncultured	uncultured	uncultured	NA
2f819b3733808cc99e3c71d1bcfb61fb	TSAR	Ochrophyta	Chrysophyceae	uncultured	uncultured	uncultured	NA
AB749074.1.1671	TSAR	Ochrophyta	Chrysophyceae	uncultured	uncultured	uncultured	NA
771a1417cf62adf5a2b65c055c813947	TSAR	Ochrophyta	Dictyochophyceae	Pedinellales	Pedinellales	Pseudopedinella	Phototrophic
08ceee2e511e88a2a71744b67f9aaebf	TSAR	Labyrinthulomycetes	Labyrinthulomycetes	Labyrinthulomycetes	Sorodiplophrys	uncultured_Eimeriidae	Consumers
abaac6ad36d622ea0d73d47bfd6de8ed	TSAR	Labyrinthulomycetes	Labyrinthulomycetes	Labyrinthulomycetes	Sorodiplophrys	uncultured_freshwater	Consumers
09602e4756b09d0bc0f07a2485fd5d79	TSAR	Labyrinthulomycetes	Labyrinthulomycetes	Labyrinthulomycetes	Sorodiplophrys	uncultured_Eimeriidae	Consumers
89a97fccf754ca39f9a2aadd8994eccb	TSAR	Labyrinthulomycetes	Labyrinthulomycetes	Labyrinthulomycetes	Sorodiplophrys	uncultured_Eimeriidae	Consumers
9d161a2cdf13c584a930d4f31d3e34f0	TSAR	Labyrinthulomycetes	Labyrinthulomycetes	Labyrinthulomycetes	Sorodiplophrys	uncultured_Eimeriidae	Consumers
395642b02b8cb421f4d2247a27a1095f	TSAR	Labyrinthulomycetes	Labyrinthulomycetes	Labyrinthulomycetes	Sorodiplophrys	uncultured_Eimeriidae	Consumers
d96b4d841bd93171406783d1d4938dcc	TSAR	Labyrinthulomycetes	Labyrinthulomycetes	Labyrinthulomycetes	Sorodiplophrys	uncultured_Eimeriidae	Consumers
3004d039b65d5c159f0b6ee5ae168143	TSAR	Labyrinthulomycetes	Labyrinthulomycetes	Labyrinthulomycetes	Sorodiplophrys	uncultured_Eimeriidae	Consumers
dc7337fd925e9a59a786ddcd1aa0283a	TSAR	Labyrinthulomycetes	Labyrinthulomycetes	Labyrinthulomycetes	Sorodiplophrys	uncultured_Eimeriidae	Consumers
5c84761de60c592206cbbad2b49c6d0a	TSAR	Labyrinthulomycetes	Labyrinthulomycetes	Labyrinthulomycetes	Sorodiplophrys	uncultured_Eimeriidae	Consumers
fe070eba0bb81f90bf841be2ec2aa93a	TSAR	Labyrinthulomycetes	Labyrinthulomycetes	Labyrinthulomycetes	Sorodiplophrys	uncultured_Eimeriidae	Consumers
b716bf710d3324ec01326fe976851610	TSAR	Labyrinthulomycetes	Labyrinthulomycetes	Labyrinthulomycetes	Sorodiplophrys	uncultured_Eimeriidae	Consumers
259ee08c78ef54ed5b38befc0e9ceefc	TSAR	Labyrinthulomycetes	Labyrinthulomycetes	Labyrinthulomycetes	Sorodiplophrys		Consumers
09d47ce246440c54f07ba01608ee1a43	TSAR	Labyrinthulomycetes	Labyrinthulomycetes	Labyrinthulomycetes	Sorodiplophrys	uncultured_freshwater	Consumers
9c0f51b6836a984a9ee13c0eec35d73d	TSAR	Labyrinthulomycetes	Labyrinthulomycetes	Labyrinthulomycetes	Sorodiplophrys	uncultured_freshwater	Consumers
52368f4df56545a4f68f7321bd04e5c7	TSAR	Labyrinthulomycetes	Labyrinthulomycetes	Labyrinthulomycetes	Sorodiplophrys	uncultured_labyrinthulid	Consumers
0abdba9472c4b45976a9969e1203bd28	TSAR	Labyrinthulomycetes	Labyrinthulomycetes	Labyrinthulomycetes	Sorodiplophrys	uncultured_labyrinthulid	Consumers
4c34e21cfad37e2dcaddd27718bd3980	TSAR	Labyrinthulomycetes	Labyrinthulomycetes	Labyrinthulomycetes	Sorodiplophrys	uncultured_labyrinthulid	Consumers
01b44e586bbaee5b5e523c9c88058677	TSAR	Labyrinthulomycetes	Labyrinthulomycetes	Labyrinthulomycetes	Sorodiplophrys	uncultured_freshwater	Consumers
0d0137002e94be8f1efdc21c43bb1540	TSAR	Labyrinthulomycetes	Labyrinthulomycetes	Labyrinthulomycetes	Sorodiplophrys		Consumers
6a2281055f5459ba26b2e3fe66bbd742	TSAR	Labyrinthulomycetes	Labyrinthulomycetes	Labyrinthulomycetes	Sorodiplophrys		Consumers
be05c0f72aea795af7a85debc0a42127	TSAR	Labyrinthulomycetes	Labyrinthulomycetes	Labyrinthulomycetes	Sorodiplophrys	uncultured_freshwater	Consumers
81ccd8addab0b2573f86dea0e8bc121c	TSAR	Labyrinthulomycetes	Labyrinthulomycetes	Labyrinthulomycetes	Sorodiplophrys	uncultured_freshwater	Consumers
92aeb74c4b4ea13508784804f38ae675	TSAR	Labyrinthulomycetes	Labyrinthulomycetes	Labyrinthulomycetes	Sorodiplophrys		Consumers
5217fd0a24ced1ed7bf79ae1dccdea16	TSAR	Labyrinthulomycetes	Labyrinthulomycetes	Labyrinthulomycetes	Sorodiplophrys	uncultured_freshwater	Consumers
e52c06cccb03469121f4651dc8c502c4	TSAR	Labyrinthulomycetes	Labyrinthulomycetes	Labyrinthulomycetes	Sorodiplophrys	uncultured_freshwater	Consumers
65ba41ed19cbc8e6861487379986e1ff	TSAR	Labyrinthulomycetes	Labyrinthulomycetes	Labyrinthulomycetes	Sorodiplophrys	uncultured_freshwater	Consumers
9bd07aface3c4ecdae477eabcc2e5f7c	TSAR	Labyrinthulomycetes	Labyrinthulomycetes	Labyrinthulomycetes	Sorodiplophrys		Consumers
2bf88c7bc460dc678a40fcd0271bf0ac	TSAR	Labyrinthulomycetes	Labyrinthulomycetes	Labyrinthulomycetes	Sorodiplophrys	uncultured_freshwater	Consumers
a58f74d350f28c475f6c40fb3450f65c	TSAR	Labyrinthulomycetes	Labyrinthulomycetes	Labyrinthulomycetes	Sorodiplophrys	uncultured_freshwater	Consumers
9bc557631389305e1c5e34aaae0715a4	TSAR	Labyrinthulomycetes	Labyrinthulomycetes	Labyrinthulomycetes	Sorodiplophrys	uncultured_freshwater	Consumers
14039ae49e2ada3a0e974b9602bc5c73	TSAR	Labyrinthulomycetes	Labyrinthulomycetes	Labyrinthulomycetes	Sorodiplophrys	uncultured_freshwater	Consumers
441a2d5862a4c0dbd2a6e786257994cd	TSAR	Labyrinthulomycetes	Labyrinthulomycetes	Labyrinthulomycetes	Sorodiplophrys	uncultured_freshwater	Consumers
8ba1459d6896302f76f40b8cf720dfa8	TSAR	Labyrinthulomycetes	Labyrinthulomycetes	Labyrinthulomycetes	Sorodiplophrys	uncultured_freshwater	Consumers
20e58fc2a4ec6dad92c880b12185f1a5	TSAR	Labyrinthulomycetes	Labyrinthulomycetes	Labyrinthulomycetes	Sorodiplophrys	uncultured_freshwater	Consumers
d2f6fad2086bf4ab2b69b3f3b6ee73a8	TSAR	Labyrinthulomycetes	Labyrinthulomycetes	Labyrinthulomycetes	Sorodiplophrys	uncultured_freshwater	Consumers
c7699744a594fd37561f2dd299f6584f	TSAR	Labyrinthulomycetes	Labyrinthulomycetes	Labyrinthulomycetes	Sorodiplophrys	uncultured_freshwater	Consumers
d2e692ca501676e3c3c4e7d94ff8882f	TSAR	Labyrinthulomycetes	Labyrinthulomycetes	Labyrinthulomycetes	Sorodiplophrys	uncultured_freshwater	Consumers
f52f84b6e4269179c15be50bc6d09562	TSAR	Labyrinthulomycetes	Labyrinthulomycetes	Labyrinthulomycetes	Sorodiplophrys	uncultured_freshwater	Consumers
b5434db7952af8d24b8af84f4495fb2e	TSAR	Labyrinthulomycetes	Labyrinthulomycetes	Labyrinthulomycetes	Sorodiplophrys	uncultured_freshwater	Consumers
69b4342088ebb257408717ca9163a4ac	TSAR	Labyrinthulomycetes	Labyrinthulomycetes	Labyrinthulomycetes	Sorodiplophrys	uncultured_freshwater	Consumers
914419d046036756c420e02eee278363	TSAR	Labyrinthulomycetes	Labyrinthulomycetes	Labyrinthulomycetes	Sorodiplophrys	uncultured_freshwater	Consumers
1998263efe9356a038e903e04ce95bb3	TSAR	Labyrinthulomycetes	Labyrinthulomycetes	Labyrinthulomycetes	Sorodiplophrys	uncultured_freshwater	Consumers
31abe3f2cd49f91685519e63cff023d9	TSAR	Labyrinthulomycetes	Labyrinthulomycetes	Labyrinthulomycetes	Sorodiplophrys	uncultured_freshwater	Consumers
c976286c759f81b778df938d82177bc6	TSAR	Labyrinthulomycetes	Labyrinthulomycetes	Labyrinthulomycetes	Sorodiplophrys	uncultured_freshwater	Consumers
cf828c818980bdf4d28b9e617c6821be	TSAR	Labyrinthulomycetes	Labyrinthulomycetes	Labyrinthulomycetes	Sorodiplophrys	uncultured_freshwater	Consumers
98ec7113eb1f8170924da0930c9bb7eb	TSAR	Labyrinthulomycetes	Labyrinthulomycetes	Labyrinthulomycetes	Sorodiplophrys	uncultured_labyrinthulid	Consumers
bda99b040b4a6bab1a7edd1d00d95c63	TSAR	Labyrinthulomycetes	Labyrinthulomycetes	Labyrinthulomycetes	Sorodiplophrys	uncultured_freshwater	Consumers
329828901e9060002b00bf0b4fc3fb82	TSAR	Labyrinthulomycetes	Labyrinthulomycetes	Labyrinthulomycetes	Sorodiplophrys	uncultured_freshwater	Consumers
a1645481c244dd666c3adc1993187c62	TSAR	Labyrinthulomycetes	Labyrinthulomycetes	Labyrinthulomycetes	Sorodiplophrys	uncultured_freshwater	Consumers
066ff730a9bb61a34ad2d113ffe4475a	TSAR	Labyrinthulomycetes	Labyrinthulomycetes	Labyrinthulomycetes	Sorodiplophrys	uncultured_freshwater	Consumers
66dd69556c0a30f6c7bba03ce93eee17	TSAR	Labyrinthulomycetes	Labyrinthulomycetes	Labyrinthulomycetes	Sorodiplophrys	uncultured_freshwater	Consumers
7aa0b5c64e0c2cf3d7a635a6be1e6326	TSAR	Labyrinthulomycetes	Labyrinthulomycetes	Labyrinthulomycetes	Sorodiplophrys	uncultured_freshwater	Consumers
2992872e2a0fdfb088072b477981a9df	TSAR	Labyrinthulomycetes	Labyrinthulomycetes	Labyrinthulomycetes	Sorodiplophrys	uncultured_freshwater	Consumers
0434af7cb0c1adc0c27f1daea9b0b365	TSAR	Labyrinthulomycetes	Labyrinthulomycetes	Labyrinthulomycetes	Sorodiplophrys	uncultured_freshwater	Consumers
0b5370c7c1eb79b72446c4c12af51314	TSAR	Labyrinthulomycetes	Labyrinthulomycetes	Labyrinthulomycetes	Sorodiplophrys	uncultured_freshwater	Consumers
b163d576be32627064781e78d3ce2201	TSAR	Labyrinthulomycetes	Labyrinthulomycetes	Labyrinthulomycetes	Sorodiplophrys	uncultured_freshwater	Consumers
faa8343bf08954c7576ba501823face9	TSAR	Labyrinthulomycetes	Labyrinthulomycetes	Labyrinthulomycetes	Sorodiplophrys	uncultured_freshwater	Consumers
8578a3caaa8bd646261d5edee39d2b53	TSAR	Labyrinthulomycetes	Labyrinthulomycetes	Labyrinthulomycetes	Sorodiplophrys	uncultured_freshwater	Consumers
a05799371b48866d8b008aba9ff074a8	TSAR	Labyrinthulomycetes	Labyrinthulomycetes	Labyrinthulomycetes	Sorodiplophrys	uncultured_freshwater	Consumers
692e674d41ed84406380853ac8799df6	TSAR	Labyrinthulomycetes	Labyrinthulomycetes	Labyrinthulomycetes	Sorodiplophrys	uncultured_freshwater	Consumers
31664942bc10dd8fc565f7f4643d7110	TSAR	Labyrinthulomycetes	Labyrinthulomycetes	Labyrinthulomycetes	Sorodiplophrys	uncultured_freshwater	Consumers
c9b57af0b8da55371e10d1375ce5a3b4	TSAR	Labyrinthulomycetes	Labyrinthulomycetes	Labyrinthulomycetes	Sorodiplophrys	uncultured_Eimeriidae	Consumers
7cacbc147e24c88284872f0944b4d8e9	TSAR	Labyrinthulomycetes	Labyrinthulomycetes	Labyrinthulomycetes	Sorodiplophrys	uncultured_Eimeriidae	Consumers
ba5214a7f0abcf13f515beb86d1bb9d7	TSAR	Labyrinthulomycetes	Labyrinthulomycetes	Labyrinthulomycetes	Sorodiplophrys	uncultured_eukaryote	Consumers
c1ea244548606a6434e821c7cc309576	TSAR	Labyrinthulomycetes	Labyrinthulomycetes	Labyrinthulomycetes	Sorodiplophrys	uncultured_eukaryote	Consumers
fab4a2ce688d46c00f8a66c3149187e6	TSAR	Labyrinthulomycetes	Labyrinthulomycetes	Labyrinthulomycetes	Sorodiplophrys	uncultured_eukaryote	Consumers
1a57420357885826798a908c9b2b333a	TSAR	Labyrinthulomycetes	Labyrinthulomycetes	Labyrinthulomycetes	Sorodiplophrys	uncultured_Eimeriidae	Consumers
7d3b1c184110dfc14795e9ef381da415	TSAR	Labyrinthulomycetes	Labyrinthulomycetes	Labyrinthulomycetes	Sorodiplophrys	uncultured_Eimeriidae	Consumers
9a1920e5f4dfec42bb989ca827664574	TSAR	Labyrinthulomycetes	Labyrinthulomycetes	Labyrinthulomycetes	Sorodiplophrys	uncultured_Eimeriidae	Consumers
df4509d7837fe407319c9b1c7227edf0	TSAR	Labyrinthulomycetes	Labyrinthulomycetes	Labyrinthulomycetes	Sorodiplophrys	uncultured_Eimeriidae	Consumers
1b501c70532fcd9cb0560dbe860a9999	TSAR	Labyrinthulomycetes	Labyrinthulomycetes	Labyrinthulomycetes	Sorodiplophrys	uncultured_Eimeriidae	Consumers
be1f9ea2470c5503ccdbc763ee48e991	TSAR	Labyrinthulomycetes	Labyrinthulomycetes	Labyrinthulomycetes	Sorodiplophrys	uncultured_Eimeriidae	Consumers
b62a28899a5cbe827c6c540eb76d01e1	TSAR	Labyrinthulomycetes	Labyrinthulomycetes	Labyrinthulomycetes	Sorodiplophrys	uncultured_Eimeriidae	Consumers
f0647bd3e7276c1cadcf2eb024ed3aad	TSAR	Labyrinthulomycetes	Labyrinthulomycetes	Labyrinthulomycetes	Sorodiplophrys	uncultured_Eimeriidae	Consumers
4581a26bc900d09914f1fb66677bc7fd	TSAR	Labyrinthulomycetes	Labyrinthulomycetes	Labyrinthulomycetes	Sorodiplophrys	metagenome	Consumers
c3fb5f47bf30485049fdc97ab2e920f5	TSAR	Labyrinthulomycetes	Labyrinthulomycetes	Labyrinthulomycetes	Sorodiplophrys	metagenome	Consumers
AB512124.1.1765	TSAR	Ochrophyta	Raphidophyceae	Chattonellales	Chattonellales	NA	Phototrophic
14d04817c76c1739304227aae1eff55e	TSAR	Ochrophyta	Eustigmatophyceae	Eustigmatales	Eustigmatales	Eustigmatales	Phototrophic
KF757253.1.1762	TSAR	Ochrophyta	Eustigmatophyceae	Eustigmatales	Eustigmatales	Eustigmatales	Phototrophic
GQ330585.1.1460	TSAR	Ochrophyta	Eustigmatophyceae	Eustigmatales	Eustigmatales	Eustigmatales	Phototrophic
AF045048.1.1790	TSAR	Ochrophyta	Eustigmatophyceae	Eustigmatales	Eustigmatales	Nannochloropsis	Phototrophic
JQ420104.1.1782	TSAR	Ochrophyta	Eustigmatophyceae	Eustigmatales	Eustigmatales	phytoplankton	Phototrophic
2508cef371bf564168e2aa7d8e81a650	TSAR	Ochrophyta	Eustigmatophyceae	Eustigmatales	Eustigmatales	Eustigmatales	Phototrophic
KF757249.1.1623	TSAR	Ochrophyta	Eustigmatophyceae	Eustigmatales	Eustigmatales	Eustigmatales	Phototrophic
fab1a83d0a8f6bc33af6474c3eee19c3	TSAR	MASTs	MAST-3J	MAST-3J	MAST-3J	MAST-3J	Consumers
4396abd4397d9277e9b5db57b3734653	TSAR	Bicosoecida	uncultured	uncultured	uncultured	uncultured	Consumers
49999b6e8b7b19c08b5da6806a15096e	TSAR	Bicosoecida	uncultured	uncultured	uncultured	uncultured	Consumers
FR874494.1.1794	TSAR	MASTs	MAST-2	MAST-2	MAST-2	MAST-2	Parasitic
4f7a8aa45b801184c9d43e21f2c7cba9	TSAR	Hyphochytriomycetes	Hyphochytriomycetes	Hyphochytriales	Hyphochytriales	Hyphochytriales	Consumers
e1f87196382fd9df92fb08126ca8d85a	TSAR	Hyphochytriomycetes	Hyphochytriomycetes	Hyphochytriales	Hyphochytriales	Hyphochytriales	Consumers
LC109080.1.1812	TSAR	Hyphochytriomycetes	Hyphochytriomycetes	Hyphochytriales	Hyphochytriales	Hyphochytriales	Consumers
d81d9a4eb3b3c9d24233c28863d4e22c	TSAR	Hyphochytriomycetes	Hyphochytriomycetes	Hyphochytriales	Hyphochytriales	Hyphochytriales	Consumers
AB901922.1.1811	TSAR	Hyphochytriomycetes	Hyphochytriomycetes	Hyphochytriales	Hyphochytriales	Hyphochytriales	Consumers
be8fc109b38f736c6eaacbfe382336f0	TSAR	Bicosoecida	Bicosoecida	Bicosoecida	Bicosoecida	Bicosoecida	Consumers
a527efb302f84ca36c6d53c3eb72d189	TSAR	Bicosoecida	Bicosoecida	Bicosoecida	Bicosoecida	Bicosoecida	Consumers
a01c20aaeb139ebe268c9c94fb70d821	TSAR	Bicosoecida	Bicosoecida	Bicosoecida	Bicosoecida	Bicosoecida	Consumers
9b99c08692dbd6051f2a9b9cdb9cd6c2	TSAR	Bicosoecida	Bicosoecida	Bicosoecida	Bicosoecida	Bicosoeca	Consumers
ba29c2f9ec8b1e55448b633a9704638c	TSAR	Bicosoecida	Bicosoecida	Bicosoecida	Bicosoecida	Bicosoeca	Consumers
817deb481170570a59749b2c728981eb	TSAR	Bicosoecida	Bicosoecida	Bicosoecida	Bicosoecida	Bicosoeca	Consumers
73528d26172f76a987de790e792b65a7	TSAR	Bicosoecida	Bicosoecida	Bicosoecida	Bicosoecida	Bicosoeca	Consumers
b58a29d14f29aae7363e797734543ef2	TSAR	Bicosoecida	Bicosoecida	Bicosoecida	Bicosoecida	Bicosoeca	Consumers
5d2f9fc7b5ae2175737a5af17472717e	TSAR	Bicosoecida	Bicosoecida	Bicosoecida	Bicosoecida	Bicosoeca	Consumers
eded94ca76b49e8954854d92d28e9270	TSAR	Bicosoecida	Bicosoecida	Bicosoecida	Bicosoecida	Bicosoeca	Consumers
2dcbdf884443b54dc0ab1f9cab9c83ae	TSAR	Bicosoecida	Bicosoecida	Bicosoecida	Bicosoecida	Bicosoeca	Consumers
GU290106.1.1811	TSAR	Bicosoecida	Bicosoecida	Bicosoecida	Bicosoecida	Bicosoeca	Consumers
b624803456e18e9742a88699a8f83462	TSAR	Bicosoecida	Bicosoecida	Bicosoecida	Bicosoecida	Bicosoeca	Consumers
306d9959d95bc5b51c6ab4826b7ba31e	TSAR	Bicosoecida	Bicosoecida	Bicosoecida	Bicosoecida	Bicosoeca	Consumers
d38941ff45e301f0e85e7040d214137f	TSAR	Bicosoecida	Bicosoecida	Bicosoecida	Bicosoecida	Bicosoeca	Consumers
7f9d14eb28e2308728cd5d19ff2f670d	TSAR	Bicosoecida	Bicosoecida	Bicosoecida	Bicosoecida	Bicosoeca	Consumers
e4feaed2e3f2c0fa1bb01ffea8a1c347	TSAR	Bicosoecida	Bicosoecida	Bicosoecida	Bicosoecida	Bicosoeca	Consumers
423b6ad7b49fa522747292e7e075818c	TSAR	Bicosoecida	Bicosoecida	Bicosoecida	Bicosoecida	Bicosoeca	Consumers
d3f621af15dc3a3a24bb984b2be12b27	TSAR	Bicosoecida	Bicosoecida	Bicosoecida	Bicosoecida	Bicosoeca	Consumers
JF791020.1.1777	TSAR	Labyrinthulomycetes	Labyrinthulomycetes	Labyrinthulomycetes	Thraustochytriaceae	uncultured	Consumers
KJ761355.1.1806	TSAR	Labyrinthulomycetes	Labyrinthulomycetes	Labyrinthulomycetes	Thraustochytriaceae	Aplanochytrium	Consumers
e5e7a31bda6dc14ca5654b8352d1fb26	TSAR	Labyrinthulomycetes	Labyrinthulomycetes	Labyrinthulomycetes	Thraustochytriaceae	Aplanochytrium	Consumers
7c55a29e9db22be698b3eff9f06a096e	TSAR	Labyrinthulomycetes	uncultured	uncultured	uncultured	uncultured	Consumers
cdcee897ee1b139420205249da16d6d8	TSAR	Labyrinthulomycetes	Labyrinthulomycetes	Labyrinthulomycetes	Thraustochytriaceae	Thraustochytriaceae	Consumers
fd7cd71ab7adac7e90090e6a876c4093	TSAR	Labyrinthulomycetes	Labyrinthulomycetes	Labyrinthulomycetes	Thraustochytriaceae	Thraustochytriaceae	Consumers
7f681fdbe441f7c41449d138954819fc	TSAR	MASTs	MAST-12	MAST-12	MAST-12	MAST-12	Consumers
d2ab371aae1f8d5c7639830330af7c4c	TSAR	MASTs	MAST-12C	MAST-12C	MAST-12C	MAST-12C	Consumers
109a2ec7cc2f04db648fe62f3e864c10	TSAR	MASTs	MAST-12C	MAST-12C	MAST-12C	MAST-12C	Consumers
15f6c954de2c6df1ffc4c3fd8ccc4501	TSAR	MASTs	MAST-12C	MAST-12C	MAST-12C	MAST-12C	Consumers
EF219381.1.2004	TSAR	MASTs	MAST-12C	MAST-12C	MAST-12C	MAST-12C	Consumers
f31a3e069e48786f19145f623158d36c	TSAR	MASTs	MAST-12C	MAST-12C	MAST-12C	MAST-12C	Consumers
2e2702810ef537d87746bfc1adb1a599	TSAR	MASTs	MAST-12C	MAST-12C	MAST-12C	MAST-12C	Consumers
6f4ecb23169c2662c321c4c3009494fb	TSAR	MASTs	MAST-12C	MAST-12C	MAST-12C	MAST-12C	Consumers
56c60b1959b27117e101a18902a61190	TSAR	MASTs	MAST-12C	MAST-12C	MAST-12C	MAST-12C	Consumers
184de0fe4dbeb31b9afa62b0da1909f7	TSAR	MASTs	MAST-12C	MAST-12C	MAST-12C	MAST-12C	Consumers
be114ba1f10b60376a0073ca56777045	TSAR	MASTs	MAST-12C	MAST-12C	MAST-12C	MAST-12C	Consumers
ca44ae3711c0e77d4fe58bd16452d80e	TSAR	MASTs	MAST-12C	MAST-12C	MAST-12C	MAST-12C	Consumers
758e7bfcdc89125b0fe53b0a038d4960	TSAR	MASTs	MAST-12C	MAST-12C	MAST-12C	MAST-12C	Consumers
EF219382.1.1726	TSAR	MASTs	MAST-12C	MAST-12C	MAST-12C	MAST-12C	Consumers
GQ330588.1.1452	TSAR	MASTs	MAST-12C	MAST-12C	MAST-12C	MAST-12C	Consumers
c3bd6d926c3185d13538adeeee5b4439	TSAR	MASTs	MAST-12C	MAST-12C	MAST-12C	MAST-12C	Consumers
cb05e870a41b1db0a11d9999dc49973d	TSAR	MASTs	MAST-12C	MAST-12C	MAST-12C	MAST-12C	Consumers
fddf6f95fdeeb2212da3066895a5b4e9	TSAR	Peronosporomycetes	Peronosporomycetes	Peronosporomycetes	Peronosporomycetes	NA	Parasitic
a6bd6b948bd1050d9c31c29142144bd6	TSAR	Peronosporomycetes	Peronosporomycetes	Peronosporomycetes	Peronosporomycetes	Aphanomyces	Parasitic
23e87b8ae4b79af6f29ee25b366b220b	TSAR	Peronosporomycetes	Peronosporomycetes	Peronosporomycetes	Peronosporomycetes	Peronosporomycetes	Parasitic
595ce4d530950063115675073bb64468	TSAR	Peronosporomycetes	Peronosporomycetes	Peronosporomycetes	Peronosporomycetes	NA	Parasitic
7c67b941321538626841558df9c508c7	TSAR	Peronosporomycetes	Peronosporomycetes	Peronosporomycetes	Peronosporomycetes	Peronosporomycetes	Parasitic
GU479947.1.1453	TSAR	Peronosporomycetes	Peronosporomycetes	Peronosporomycetes	Peronosporomycetes	Aphanomyces	Parasitic
73d56e79e015a5b70a40315e5eb3852d	TSAR	Peronosporomycetes	Peronosporomycetes	Peronosporomycetes	Peronosporomycetes	Aphanomyces	Parasitic
M32705.1.1809	TSAR	Peronosporomycetes	Peronosporomycetes	Peronosporomycetes	Peronosporomycetes	Achlya	Parasitic
ADCG02001924.4.1469	TSAR	Peronosporomycetes	Peronosporomycetes	Peronosporomycetes	Peronosporomycetes	Peronosporomycetes	Parasitic
GU479948.1.1461	TSAR	Peronosporomycetes	Peronosporomycetes	Peronosporomycetes	Peronosporomycetes	NA	Parasitic
AJ238656.1.1774	TSAR	Peronosporomycetes	Peronosporomycetes	Peronosporomycetes	Peronosporomycetes	NA	Parasitic
d7a2be0bbaafc1372b264e4791e07066	TSAR	Peronosporomycetes	Peronosporomycetes	Peronosporomycetes	Peronosporomycetes	NA	Parasitic
8ec8c4b2a338505d55b9c7d19f83d89a	TSAR	Peronosporomycetes	Peronosporomycetes	Peronosporomycetes	Peronosporomycetes	NA	Parasitic
e626023a3715fbb8f910201c0e2c281c	TSAR	Peronosporomycetes	Peronosporomycetes	Peronosporomycetes	Peronosporomycetes	Aphanomyces	Parasitic
546b23d561441128c584229f59577f4a	TSAR	Peronosporomycetes	Peronosporomycetes	Peronosporomycetes	Peronosporomycetes	Aphanomyces	Parasitic
AYTG01000691.4297.6094	TSAR	Peronosporomycetes	Peronosporomycetes	Peronosporomycetes	Peronosporomycetes	Aphanomyces	Parasitic
458226fc15d25f7ed33e3f2234c60722	TSAR	Peronosporomycetes	Peronosporomycetes	Peronosporomycetes	Peronosporomycetes	Aphanomyces	Parasitic
160062887b1737ee0ec9725a5c747c9d	TSAR	Peronosporomycetes	Peronosporomycetes	Peronosporomycetes	Peronosporomycetes	Aphanomyces	Parasitic
b16ba375e004aa2c67970e67306e3256	TSAR	Peronosporomycetes	Peronosporomycetes	Peronosporomycetes	Peronosporomycetes	Aphanomyces	Parasitic
eb4d83a8006f20e96d17ec04be24e16c	TSAR	Peronosporomycetes	Peronosporomycetes	Peronosporomycetes	Peronosporomycetes	Aphanomyces	Parasitic
b9dc85ecb916c9d080467a04fb48778e	TSAR	Peronosporomycetes	Peronosporomycetes	Peronosporomycetes	Peronosporomycetes	NA	Parasitic
6f016f6950dcab6fb2c8b8ea98bbb5a3	TSAR	Peronosporomycetes	Peronosporomycetes	Peronosporomycetes	Peronosporomycetes	Peronosporomycetes	Parasitic
266c35c0bab04bbc6b59c7c117733373	TSAR	Peronosporomycetes	Peronosporomycetes	Peronosporomycetes	Peronosporomycetes	NA	Parasitic
74c1f35c5948cb727ead86e4f62d0412	TSAR	Peronosporomycetes	Peronosporomycetes	Peronosporomycetes	Peronosporomycetes	NA	Parasitic
AY598650.1.1801	TSAR	Peronosporomycetes	Peronosporomycetes	Peronosporomycetes	Peronosporomycetes	NA	Parasitic
7ffe752f552841d487b01bfedd85313f	TSAR	Peronosporomycetes	Peronosporomycetes	Peronosporomycetes	Peronosporomycetes	uncultured	Parasitic
KT257373.1.1797	TSAR	Peronosporomycetes	Peronosporomycetes	Peronosporomycetes	Peronosporomycetes	Peronosporomycetes	Parasitic
X54266.1.1822	TSAR	Peronosporomycetes	Peronosporomycetes	Peronosporomycetes	Peronosporomycetes	Lagenidium	Parasitic
AC242165.161185.163000	TSAR	Peronosporomycetes	Peronosporomycetes	Peronosporomycetes	Peronosporomycetes	Phytophthora	Parasitic
JN635161.1.1705	TSAR	Peronosporomycetes	Peronosporomycetes	Peronosporomycetes	Peronosporomycetes	Phytophthora	Parasitic
e6ff1d86ebbc7086123f541933532890	TSAR	Peronosporomycetes	Peronosporomycetes	Peronosporomycetes	Peronosporomycetes	Pythium	Parasitic
d744b93156cfcc57b154740bb0385a08	TSAR	Peronosporomycetes	Peronosporomycetes	Peronosporomycetes	Peronosporomycetes	Pythium	Parasitic
HQ643697.1.1796	TSAR	Peronosporomycetes	Peronosporomycetes	Peronosporomycetes	Peronosporomycetes	Pythium	Parasitic
AAAA02038450.2584.4394	TSAR	Peronosporomycetes	Peronosporomycetes	Peronosporomycetes	Peronosporomycetes	Pythium	Parasitic
e73dad2b594c8561bd7b976d3267669c	TSAR	Peronosporomycetes	Peronosporomycetes	Peronosporomycetes	Peronosporomycetes	Pythium	Parasitic
EF418925.1.1806	TSAR	Peronosporomycetes	Peronosporomycetes	Peronosporomycetes	Peronosporomycetes	Phytopythium	Parasitic
7a3f8072faa1f03e915d1349fea9e7df	TSAR	Peronosporomycetes	Peronosporomycetes	Peronosporomycetes	Peronosporomycetes	uncultured	Parasitic
ff5e35884d7cd27ec84ddba438a3319e	TSAR	Peronosporomycetes	Peronosporomycetes	Peronosporomycetes	Peronosporomycetes	uncultured	Parasitic
18102ce6103bf5521599b8f1e7623a8e	TSAR	Peronosporomycetes	Peronosporomycetes	Peronosporomycetes	Peronosporomycetes	Peronosporomycetes	Parasitic
ce5e0fd2e29119f10a4c2224694d17af	TSAR	Peronosporomycetes	Peronosporomycetes	Peronosporomycetes	Peronosporomycetes	Halodaphnea	Parasitic
AF372763.1.1585	TSAR	Peronosporomycetes	Peronosporomycetes	Peronosporomycetes	Peronosporomycetes	uncultured	Parasitic
a49227394b42baa4c29248f59e150d71	TSAR	Peronosporomycetes	Peronosporomycetes	Peronosporomycetes	Peronosporomycetes	uncultured	Parasitic
022bdd3354e2c79a296af517bb0d3bb6	TSAR	Peronosporomycetes	Peronosporomycetes	Peronosporomycetes	Peronosporomycetes	NA	Parasitic
2c7d9c7a469176b10bff842ad3002f2f	TSAR	Peronosporomycetes	Peronosporomycetes	Peronosporomycetes	Peronosporomycetes	NA	Parasitic
cb84d45be1bb9698f23ba29d9cdfd3c0	TSAR	Peronosporomycetes	Peronosporomycetes	Peronosporomycetes	Peronosporomycetes	NA	Parasitic
5eea42bdc8a4b3d012fcc23399bd04b9	TSAR	Peronosporomycetes	Peronosporomycetes	Peronosporomycetes	Peronosporomycetes	NA	Parasitic
cc97748d19c76c4c278ab425d2284b8e	TSAR	Peronosporomycetes	Peronosporomycetes	Peronosporomycetes	Peronosporomycetes	NA	Parasitic
4a115f476b48037666e4f8305911ab32	TSAR	Labyrinthulomycetes	Labyrinthulomycetes	Labyrinthulomycetes	Labyrinthulaceae	Labyrinthula	Consumers
dd2104ca7014da641b1888ade97b04ac	TSAR	Labyrinthulomycetes	Labyrinthulomycetes	Labyrinthulomycetes	Labyrinthulaceae	Labyrinthula	Consumers
797d11798fc338a0c411f958b88d741d	TSAR	Labyrinthulomycetes	Labyrinthulomycetes	Labyrinthulomycetes	Labyrinthulaceae	Labyrinthula	Consumers
f10915c9cb60d85dcada3348efefcbbc	TSAR	Labyrinthulomycetes	Labyrinthulomycetes	Labyrinthulomycetes	Labyrinthulaceae	Labyrinthula	Consumers
d9ad536b679855d36fd9639147ee6421	TSAR	Labyrinthulomycetes	Labyrinthulomycetes	Labyrinthulomycetes	Labyrinthulaceae	Labyrinthula	Consumers
afec90439fdb6ea220f7f6f2029d2e37	TSAR	Labyrinthulomycetes	Labyrinthulomycetes	Labyrinthulomycetes	Labyrinthulaceae	Labyrinthula	Consumers
d333e8a26112e91ce3c4425c0283a071	TSAR	Labyrinthulomycetes	Labyrinthulomycetes	Labyrinthulomycetes	Labyrinthulaceae	Labyrinthula	Consumers
AB430588.1.1784	TSAR	Diatomea	Coscinodiscophytina	Coscinodiscophytina	Melosirids	Melosira	Phototrophic
AB425199.1.1717	TSAR	Peronosporomycetes	Peronosporomycetes	Peronosporomycetes	Peronosporomycetes	Haptoglossa	Parasitic
476a8a1680549bd1eb645765e7f0729f	TSAR	Cercozoa	NoveClad10	NoveClad10	NoveClad10	NoveClad10	Consumers
a18406365db764f3ed3e6c916cda721c	TSAR	Cercozoa	NoveClad10	NoveClad10	NoveClad10	NoveClad10	Consumers
952f13847a91be069a7a6af43a40af70	TSAR	Cercozoa	NoveClad12	NoveClad12	NoveClad12	NoveClad12	Consumers
9616bed3aeaa2b98f1f64c37bdd7095c	TSAR	Cercozoa	NoveClad10	NoveClad10	NoveClad10	NoveClad10	Consumers
5fc71409008208b450915117986d37c2	TSAR	Cercozoa	NoveClad10	NoveClad10	NoveClad10	NoveClad10	Consumers
51caa9dae44ddd5f4d80f7c00935e170	TSAR	Cercozoa	NoveClad10	NoveClad10	NoveClad10	NoveClad10	Consumers
c8cda17041b897f92e66087a4bc82ddd	TSAR	Cercozoa	NoveClad10	NoveClad10	NoveClad10	NoveClad10	Consumers
b953d57379a47f86eb2f4a1ba408bccc	TSAR	Cercozoa	Granofilosea	Granofilosea	Granofilosea	Massisteria	Consumers
82c82887f11436999b2c7299b66aea47	TSAR	Cercozoa	Phytomyxea	Phytomyxea	Phytomyxea	Woronina	Parasitic
AF310898.1.1849	TSAR	Cercozoa	Phytomyxea	Phytomyxea	Phytomyxea	Polymyxa	Parasitic
76efc388c223879a3f9e578056d457b9	TSAR	Cercozoa	uncultured	uncultured	uncultured	uncultured	Consumers
4e2a1443d089b72942158b125e686f5e	TSAR	Cercozoa	NoveClad12	NoveClad12	NoveClad12	NoveClad12	Consumers
60610a39ded921e9201ac5c4c34b6ebd	TSAR	Cercozoa	NoveClad12	NoveClad12	NoveClad12	NoveClad12	Consumers
585507ad6e62302fa732317d9fc30a5b	TSAR	Cercozoa	Imbricatea	Spongomonadida	Spongomonadida	Spongomonas	Consumers
55458374d048bc297ecb81419934f37a	TSAR	Cercozoa	Imbricatea	Spongomonadida	Spongomonadida	Spongomonas	Consumers
7c9a1435d5c9c5caaef62c5a9b68a0ad	TSAR	Cercozoa	Imbricatea	Spongomonadida	Spongomonadida	Spongomonas	Consumers
990bb0dbdb3f9f1ad0638454d2a0ab2c	TSAR	Cercozoa	Imbricatea	Spongomonadida	Spongomonadida	Spongomonas	Consumers
EF032802.1.1769	TSAR	Cercozoa	NoveCladGran-5	NoveCladGran-5	NoveCladGran-5	NoveCladGran-5	Consumers
8573244b75717f579e84e3d289b71620	TSAR	Cercozoa	NoveCladGran-5	NoveCladGran-5	NoveCladGran-5	NoveCladGran-5	Consumers
302ff1596ff004fd705514cf8be6c1d2	TSAR	Cercozoa	NoveCladGran-5	NoveCladGran-5	NoveCladGran-5	NoveCladGran-5	Consumers
5012ac09036f8829c10f6be1b1c341b3	TSAR	Cercozoa	Cercomonadidae	Cercomonadidae	Cercomonadidae	Eocercomonas	Consumers
HM536145.1.1796	TSAR	Cercozoa	Cercomonadidae	Cercomonadidae	Cercomonadidae	Cercomonas	Consumers
cb7b8fa783633b29735de821af393185	TSAR	Cercozoa	Cercomonadidae	Cercomonadidae	Cercomonadidae	Cercomonas	Consumers
7ad3517af63e63fe991fe6fd651a99ae	TSAR	Cercozoa	Cercomonadidae	Cercomonadidae	Cercomonadidae	uncultured	Consumers
FPLS01027177.5.1676	TSAR	Cercozoa	Cercomonadidae	Cercomonadidae	Cercomonadidae	uncultured	Consumers
7e45ac0d51282ac0276943646fa4f95a	TSAR	Cercozoa	Cercomonadidae	Cercomonadidae	Cercomonadidae	uncultured	Consumers
1714e14bf9243ed1a2a05e3dbfc8e0b9	TSAR	Cercozoa	Cercomonadidae	Cercomonadidae	Cercomonadidae	uncultured	Consumers
432d16658002a8b1473892ac6960a980	TSAR	Cercozoa	Cercomonadidae	Cercomonadidae	Cercomonadidae	uncultured	Consumers
6f31cd5a15b95d92d91627c47a9eac09	TSAR	Cercozoa	Cercomonadidae	Cercomonadidae	Cercomonadidae	Paracercomonas	Consumers
8b3b37c48ccfe02e0272645f0df649ff	TSAR	Cercozoa	Cercomonadidae	Cercomonadidae	Cercomonadidae	Paracercomonas	Consumers
18dd19a1bfc4c140c68039b02f2aeb31	TSAR	Cercozoa	Cercomonadidae	Cercomonadidae	Cercomonadidae	NA	Consumers
52c25238228377473d3e565e8eac963a	TSAR	Cercozoa	Cercomonadidae	Cercomonadidae	Cercomonadidae	NA	Consumers
eeb3ebf44bc6c7e529b1f5dc37e21411	TSAR	Cercozoa	Cercomonadidae	Cercomonadidae	Cercomonadidae	Paracercomonas	Consumers
90511bda7359bea9c28c84eee6c9d04c	TSAR	Cercozoa	Cercomonadidae	Cercomonadidae	Cercomonadidae	Paracercomonas	Consumers
4ac46955b0752080b9c08b1f2c73ad6a	TSAR	Cercozoa	Cercomonadidae	Cercomonadidae	Cercomonadidae	uncultured	Consumers
531d16afd356ea49b79b6dafcf023a84	TSAR	Cercozoa	Cercomonadidae	Cercomonadidae	Cercomonadidae	uncultured	Consumers
AF534712.1.2943	TSAR	Cercozoa	Cercomonadidae	Cercomonadidae	Cercomonadidae	Cercomonas	Consumers
0b4f811b90a1e6e42f32f762b6f06f33	TSAR	Cercozoa	Cercomonadidae	Cercomonadidae	Cercomonadidae	Paracercomonas	Consumers
46a91fbb6e34eb4abf2fe8e728a8be65	TSAR	Cercozoa	Cercozoa	Cercozoa	Cercozoa	Cyranomonas	Consumers
2bb561642fbbc5b606a4605c1cbaa209	TSAR	Cercozoa	Imbricatea	Imbricatea	Thaumatomonadida	D2P04A09	Consumers
de7047e3916e1b2d11b79241fb7a3e02	TSAR	Cercozoa	Imbricatea	Imbricatea	Thaumatomonadida	D2P04A09	Consumers
2b0099d34dd7d3e8d8d6a6ea15f02d9f	TSAR	Cercozoa	Imbricatea	Imbricatea	Thaumatomonadida	Gyromitus	Consumers
0ec0687ff1e7c65611663f2f8d7f49b6	TSAR	Cercozoa	Glissomonadida	Glissomonadida	Glissomonadida	Glissomonadida	Consumers
371edb3753301aa1cf4333a066df2a2a	TSAR	Cercozoa	Glissomonadida	Glissomonadida	Glissomonadida	Glissomonadida	Consumers
44a77bebbb6cf68bc0fdf11f7cd8c3d5	TSAR	Cercozoa	Incerta_sedis	Incerta_sedis	Incerta_sedis	Kraken	Consumers
AB695519.1.1774	TSAR	Cercozoa	Incerta_sedis	Incerta_sedis	Incerta_sedis	Kraken	Consumers
529687f6ab1df1e174d804d888a11a27	TSAR	Cercozoa	Imbricatea	Imbricatea	Thaumatomonadida	Thaumatomonadidae	Consumers
1f19911c2c57cd4e1385fa84d953ed6d	TSAR	Cercozoa	Thecofilosea	Cryomonadida	Ventrifissuridae	Ventrifissuridae	Consumers
bb523a6f49a0bccab627fff5fd9615f0	TSAR	Cercozoa	uncultured	uncultured	uncultured	uncultured	Consumers
11bc702ada58e6f3067484e7b0e787a4	TSAR	Cercozoa	Thecofilosea	Cryomonadida	Protaspidae	Protaspis	Consumers
GU385611.1.1712	TSAR	Cercozoa	Thecofilosea	Thecofilosea	Thecofilosea	Thecofilosea	Consumers
532c3c7bb6f8a81b601ba281a044fd12	TSAR	Cercozoa	Thecofilosea	Cryomonadida	Protaspidae	Protaspis	Consumers
e23153360325f3d3b34475f04cce5cd9	TSAR	Cercozoa	Thecofilosea	Thecofilosea	Thecofilosea	uncultured	Consumers
LC150064.1.1704	TSAR	Cercozoa	Thecofilosea	Cryomonadida	Rhizaspididae	Rhogostoma	Consumers
8d00447fd16297958e87b1806783b653	TSAR	Cercozoa	Thecofilosea	Cryomonadida	Rhizaspididae	Rhogostoma	Consumers
LC150141.1.1408	TSAR	Cercozoa	Thecofilosea	Cryomonadida	Rhizaspididae	Rhogostoma	Consumers
864c4c24e744abf97daee2ef8f9edb91	TSAR	Cercozoa	Thecofilosea	Cryomonadida	Rhizaspididae	Rhogostoma	Consumers
AB902257.1.1813	TSAR	Cercozoa	Thecofilosea	Cryomonadida	Rhizaspididae	Rhogostoma	Consumers
92fb52518ed24f576fe28130d992f8dc	TSAR	Cercozoa	Thecofilosea	Cryomonadida	Rhizaspididae	Rhogostoma	Consumers
LC150121.1.1653	TSAR	Cercozoa	Thecofilosea	Cryomonadida	Rhizaspididae	Rhogostoma	Consumers
FPLS01020493.8.1436	TSAR	Cercozoa	Thecofilosea	Thecofilosea	Thecofilosea	uncultured	Consumers
4d034ab15b9b07e710b4661b5101ffb6	TSAR	Cercozoa	Thecofilosea	Thecofilosea	Thecofilosea	NA	Consumers
334390192719e347f851f3ccbab8643b	TSAR	Cercozoa	Thecofilosea	Thecofilosea	Thecofilosea	Thecofilosea	Consumers
5ab22d5ada331ae0215db88b85668595	TSAR	Cercozoa	Thecofilosea	Thecofilosea	Thecofilosea	Thecofilosea	Consumers
EF024013.1.1810	TSAR	Cercozoa	Thecofilosea	Thecofilosea	Thecofilosea	Thecofilosea	Consumers
3b2ab987182b7850bc335278583714c7	TSAR	Cercozoa	Thecofilosea	Thecofilosea	Thecofilosea	Thecofilosea	Consumers
70bd77c06d144e142e0fcf36fb1afff2	TSAR	Cercozoa	Thecofilosea	Thecofilosea	Thecofilosea	Thecofilosea	Consumers
EF024819.1.1806	TSAR	Cercozoa	Thecofilosea	Thecofilosea	Thecofilosea	Thecofilosea	Consumers
HM628658.1.1579	TSAR	Cercozoa	Thecofilosea	Thecofilosea	Thecofilosea	Thecofilosea	Consumers
EF023357.1.1797	TSAR	Cercozoa	Thecofilosea	Thecofilosea	Thecofilosea	uncultured	Consumers
EF024682.1.1800	TSAR	Cercozoa	Thecofilosea	Thecofilosea	Thecofilosea	uncultured	Consumers
998a717616d7d2afea94dfc8bea560f3	TSAR	Cercozoa	Thecofilosea	Thecofilosea	Thecofilosea	uncultured	Consumers
148c95f2249a146f1e45204b9eab0527	TSAR	Cercozoa	Thecofilosea	Thecofilosea	Thecofilosea	uncultured	Consumers
36538ecafc06fbf71d0c0b413fcadbf6	TSAR	Cercozoa	Thecofilosea	Thecofilosea	Thecofilosea	uncultured	Consumers
FPLS01014549.4.1675	TSAR	Cercozoa	Thecofilosea	Thecofilosea	Thecofilosea	uncultured	Consumers
c45578df8a8cd8795bc0ca687a6c9918	TSAR	Cercozoa	Thecofilosea	Thecofilosea	Thecofilosea	uncultured	Consumers
8ee02651e7a3763b4eaf2e9ee660974a	TSAR	Cercozoa	Thecofilosea	Thecofilosea	Thecofilosea	uncultured	Consumers
524a46e58eeab30a7e0e382d577c00c4	TSAR	Cercozoa	Thecofilosea	Thecofilosea	Thecofilosea	uncultured	Consumers
b31d603ee69ce9c585afdddb9bb79801	TSAR	Cercozoa	Thecofilosea	Thecofilosea	Thecofilosea	uncultured	Consumers
e4692434c4d60f701cb1716f377819ef	TSAR	Cercozoa	Thecofilosea	Thecofilosea	Thecofilosea	uncultured	Consumers
0f46dfd2dfe2594346d8e9b0c2a1a801	TSAR	Cercozoa	Glissomonadida	Glissomonadida	Glissomonadida	NA	Consumers
65204ca7059cc4fd6b80c8718eb534bf	TSAR	Cercozoa	Glissomonadida	Glissomonadida	Glissomonadida	NA	Consumers
AB695526.1.1759	TSAR	Cercozoa	Glissomonadida	Glissomonadida	Glissomonadida	uncultured	Consumers
KF207869.1.1743	TSAR	Cercozoa	Glissomonadida	Glissomonadida	Glissomonadida	Viridiraptor	Consumers
0097837c312b33d6db0308068d5d5ef7	TSAR	Cercozoa	Glissomonadida	Glissomonadida	Glissomonadida	uncultured	Consumers
69c97fafe23f4942f83070ccfd4c9339	TSAR	Cercozoa	uncultured	uncultured	uncultured	uncultured	Consumers
FPLS01001486.2.1564	TSAR	Cercozoa	uncultured	uncultured	uncultured	uncultured	Consumers
afb818e53f0d8eaefb55ec0437b714c5	TSAR	Cercozoa	Glissomonadida	Glissomonadida	Glissomonadida	Heteromita	Consumers
d78a481349b35c2ab9a7949235fb8f7e	TSAR	Cercozoa	Glissomonadida	Glissomonadida	Glissomonadida	Heteromita	Consumers
c01ae87b4d9994c040b5e864a83c10e8	TSAR	Cercozoa	Glissomonadida	Glissomonadida	Glissomonadida	Heteromita	Consumers
98e10c07949ef2a4a39fdb39be6f6d4e	TSAR	Cercozoa	Glissomonadida	Glissomonadida	Glissomonadida	Heteromita	Consumers
fe1f0d0a793777520d1ae9fb3aaab286	TSAR	Cercozoa	Glissomonadida	Glissomonadida	Glissomonadida	Heteromita	Consumers
2480b71a1c4f0ceef0c8ae4df9c35c62	TSAR	Cercozoa	Glissomonadida	Glissomonadida	Glissomonadida	Heteromita	Consumers
32b471d44e455f4982c9a2c29db9c155	TSAR	Cercozoa	Glissomonadida	Glissomonadida	Glissomonadida	NA	Consumers
bdee2372e94a694058e56c52ef837cdf	TSAR	Cercozoa	Glissomonadida	Glissomonadida	Glissomonadida	NA	Consumers
AJ130852.1.1659	TSAR	Cercozoa	uncultured	uncultured	uncultured	uncultured	Consumers
FJ577825.1.1737	TSAR	Cercozoa	uncultured	uncultured	uncultured	uncultured	Consumers
8d15f3530b62daa0c8c48f1575345ca0	TSAR	Cercozoa	Glissomonadida	Glissomonadida	Glissomonadida	Bodomorpha	Consumers
AF411276.1.1857	TSAR	Cercozoa	Glissomonadida	Glissomonadida	Glissomonadida	Bodomorpha	Consumers
b267375f8177fb81eec4b033e42efbc2	TSAR	Cercozoa	Glissomonadida	Glissomonadida	Glissomonadida	Bodomorpha	Consumers
f549ae0188dbcb93a9f2c3dab8f09fc5	TSAR	Cercozoa	Glissomonadida	Glissomonadida	Glissomonadida	Bodomorpha	Consumers
EF456752.1.1788	TSAR	Cercozoa	Imbricatea	Imbricatea	Euglyphida	Trinema	Consumers
efdfea5f366b88c2be3ca4f78b5a300e	TSAR	Cercozoa	Imbricatea	Imbricatea	NA	NA	Consumers
4e807496498c3753d93d71e279ba620a	TSAR	Cercozoa	Cercozoa	Cercozoa	Cercozoa	Cercozoa	Consumers
dedae3c2d2fe62971cf0e7b6354415ea	TSAR	Cercozoa	Cercozoa	Cercozoa	Cercozoa	Cercozoa	Consumers
436f97947f2637c84c7cd229ca154014	TSAR	Cercozoa	Thecofilosea	Incerta_sedis	Incerta_sedis	Lecythium	Consumers
5517336b6e2f7ec17308b6507094e37e	TSAR	Cercozoa	Thecofilosea	Incerta_sedis	Incerta_sedis	Lecythium	Consumers
a4c30c68a989f8842fdf280478ee30e9	TSAR	Cercozoa	Thecofilosea	Incerta_sedis	Incerta_sedis	Lecythium	Consumers
9c6f5b1c2b1da76ef91ffb4cc3494576	TSAR	Cercozoa	Cercozoa	Cercozoa	Cercozoa	Cercozoa	Consumers
e1ae8510a52f58d037dcec059a58efd8	TSAR	Cercozoa	Cercozoa	Cercozoa	Cercozoa	Cercozoa	Consumers
9150899831219e382fa44fedb523f997	TSAR	Cercozoa	Thecofilosea	Incerta_sedis	Incerta_sedis	Lecythium	Consumers
be22aa67c095f1c5eb4fce821ab275ad	TSAR	Cercozoa	Thecofilosea	Incerta_sedis	Incerta_sedis	Pseudodifflugia	Consumers
61919a7115d3fd89c37bd88edde39237	TSAR	Cercozoa	Thecofilosea	Incerta_sedis	Incerta_sedis	Pseudodifflugia	Consumers
AJ418794.1.1798	TSAR	Cercozoa	Thecofilosea	Incerta_sedis	Incerta_sedis	Pseudodifflugia	Consumers
01f453738055238fcc47cce8a07d48bf	TSAR	Cercozoa	Cercozoa	Cercozoa	Cercozoa	Cercozoa	Consumers
977ae7a45ae2589398db8c278c90fc97	TSAR	Cercozoa	Thecofilosea	Incerta_sedis	Incerta_sedis	Pseudodifflugia	Consumers
ad9469bb02536f0a673ef378e9adc5b3	TSAR	Cercozoa	Thecofilosea	Incerta_sedis	Incerta_sedis	Pseudodifflugia	Consumers
CEPQ01000470.1.1805	TSAR	Cercozoa	Granofilosea	Granofilosea	Granofilosea	Massisteria	Consumers
2d31c79345a3f3a25d08fef8832ba44b	TSAR	Cercozoa	uncultured	uncultured	uncultured	uncultured	Consumers
a0ab7edbcf0d07c80f02b6a7cd6f3d5f	TSAR	Cercozoa	uncultured	uncultured	uncultured	uncultured	Consumers
5bf446609c1c3ca5fe52c43887c75f7f	TSAR	Cercozoa	uncultured	uncultured	uncultured	uncultured	Consumers
GAZZ01001405.71.1883	TSAR	Cercozoa	uncultured	uncultured	uncultured	uncultured	Consumers
b1b6e7b68c0c918590df711430346c07	TSAR	Cercozoa	uncultured	uncultured	uncultured	uncultured	Consumers
3955070da5d4dba0b0589c2bdae2a426	TSAR	Cercozoa	uncultured	uncultured	uncultured	uncultured	Consumers
500a1a70c025b1d2af991ae0a87476a9	TSAR	Cercozoa	uncultured	uncultured	uncultured	uncultured	Consumers
cbb5c11cfb6d1a8b0dd44df4d6a027f0	TSAR	Cercozoa	uncultured	uncultured	uncultured	uncultured	Consumers
3221fb2372f2d654d5137a7e0129929b	TSAR	Cercozoa	Incerta_sedis	Incerta_sedis	Incerta_sedis	Gymnophrys	Consumers
f1e6c8266e365120f3268699f60501ea	TSAR	Cercozoa	Incerta_sedis	Incerta_sedis	Incerta_sedis	Gymnophrys	Consumers
DQ243993.1.1816	TSAR	Cercozoa	Incerta_sedis	Incerta_sedis	Incerta_sedis	Gymnophrys	Consumers
EU567255.1.1922	TSAR	Cercozoa	Incerta_sedis	Incerta_sedis	Incerta_sedis	Gymnophrys	Consumers
AF411284.1.1817	TSAR	Cercozoa	Incerta_sedis	Incerta_sedis	Incerta_sedis	Gymnophrys	Consumers
ab162c8213c86c37435ba733d9d553f9	TSAR	Cercozoa	Incerta_sedis	Incerta_sedis	Incerta_sedis	Gymnophrys	Consumers
524b45fb8857743a36231b65fb526477	TSAR	Cercozoa	Incerta_sedis	Incerta_sedis	Incerta_sedis	Gymnophrys	Consumers
LC150102.1.1730	TSAR	Cercozoa	Incerta_sedis	Incerta_sedis	Incerta_sedis	Gymnophrys	Consumers
24c0133af90048056e107fd3dff8c61e	TSAR	Cercozoa	Incerta_sedis	Incerta_sedis	Incerta_sedis	Gymnophrys	Consumers
5f1c9c9423c1111e2ff40847785d6148	TSAR	Cercozoa	Incerta_sedis	Incerta_sedis	Incerta_sedis	Gymnophrys	Consumers
de2314367bd54b1d838e8fff5c516377	TSAR	Cercozoa	Incerta_sedis	Incerta_sedis	Incerta_sedis	Gymnophrys	Consumers
dcc9c6bb21d7690a8f394903eb294867	TSAR	Cercozoa	Incerta_sedis	Incerta_sedis	Incerta_sedis	Gymnophrys	Consumers
9d365112b60d3d5db0f4f94c938a7b4c	TSAR	Cercozoa	Incerta_sedis	Incerta_sedis	Incerta_sedis	Gymnophrys	Consumers
67b85aedff025693dcd34b8606f477a2	TSAR	Cercozoa	Incerta_sedis	Incerta_sedis	Incerta_sedis	Gymnophrys	Consumers
e69e5445a57889701a725d09d8d122b9	TSAR	Cercozoa	Incerta_sedis	Incerta_sedis	Incerta_sedis	Gymnophrys	Consumers
69ebd26474f44bb93a73fe780a7eb677	TSAR	Cercozoa	uncultured	uncultured	uncultured	uncultured	Consumers
a9414357b6f134e82de0c88847ed8866	TSAR	Cercozoa	NoveCladGran-4	NoveCladGran-4	NoveCladGran-4	NoveCladGran-4	Consumers
36cd66d7c8aecc9d09de58d55f49df7a	TSAR	Cercozoa	NoveCladGran-3	NoveCladGran-3	NoveCladGran-3	NoveCladGran-3	Consumers
cccaf88ba7fedbcc2fdfaa9fd7180d77	TSAR	Cercozoa	Cercozoa	Cercozoa	Cercozoa	Cercozoa	Consumers
ce7cd920f2be511842f06099b554e28e	TSAR	Cercozoa	Cercozoa	Cercozoa	Cercozoa	Cercozoa	Consumers
178f06db5b4875c425b0ae9f076c672b	TSAR	Cercozoa	Cercozoa	Cercozoa	Cercozoa	Cercozoa	Consumers
a62c74cd3e48e3a52cc221ce8b5ece13	TSAR	Cercozoa	Cercozoa	Cercozoa	Cercozoa	Cercozoa	Consumers
LC150071.1.1742	TSAR	Cercozoa	Cercozoa	Cercozoa	Cercozoa	Cercozoa	Consumers
e0884ac1dfee6b70d0e8db78f2fc970f	TSAR	Cercozoa	Cercozoa	Cercozoa	Cercozoa	Cercozoa	Consumers
3d27fdc591245dbfb039697e8a076f52	TSAR	Cercozoa	uncultured	uncultured	uncultured	uncultured	Consumers
a4408caa4f11af731479d4f22cdb2450	TSAR	Cercozoa	NoveCladGran-4	NoveCladGran-4	NoveCladGran-4	NoveCladGran-4	Consumers
KJ763454.1.1804	TSAR	Protalveolata	Syndiniales	Syndiniales	SyndinialeGrouII	SyndinialeGrouII	Parasitic
0b5f59172d26d4528af5082305951266	TSAR	Protalveolata	Syndiniales	Syndiniales	SyndinialeGrouII	SyndinialeGrouII	Parasitic
KJ757545.1.1803	TSAR	Protalveolata	Syndiniales	Syndiniales	SyndinialeGrouII	SyndinialeGrouII	Parasitic
9b7d35856af003b410aaf428619d1c21	TSAR	Protalveolata	Colpodellida	Colpodellida	Colpodellida	Colpodella	Consumers
2e4cbe79600a92b4f7c6c5b19a1833b6	TSAR	Protalveolata	Colpodellida	Colpodellida	Colpodellida	Colpodella	Consumers
491f5fdb8baf26f3a88ba5125c3dd86d	TSAR	Protalveolata	Colpodellida	Colpodellida	Colpodellida	Colpodella	Consumers
06d3fadfc2c4a8883d10d9852d20cf1b	TSAR	Protalveolata	Perkinsidae	A31	A31	A31	Parasitic
42ee46ed79cf36a0228dd84ea1f70231	TSAR	Protalveolata	Perkinsidae	A31	A31	A31	Parasitic
KJ925246.1.1675	TSAR	Protalveolata	Perkinsidae	A31	A31	A31	Parasitic
a737223ce5d9c42b5a3edff7832f63b5	TSAR	Cercozoa	Cercozoa	Cercozoa	Cercozoa	Cercozoa	Consumers
FJ914446.1.1527	TSAR	Dinoflagellata	Dinophyceae	Gymnodiniphycidae	Gymnodiniphycidae	Gyrodinium	Phototrophic
fad6fb1dca53cc103f037362d3159f34	TSAR	Dinoflagellata	Dinophyceae	Gymnodiniphycidae	Gymnodiniuclade	Polykrikos	Phototrophic
61affdd3a7fe6382a3afa444a604d959	TSAR	Dinoflagellata	Dinophyceae	Gymnodiniphycidae	Gymnodiniuclade	NA	NA
LC054946.1.1778	TSAR	Dinoflagellata	Dinophyceae	Peridiniales	Peridiniales	Peridiniales	Phototrophic
KX465155.1.1797	TSAR	Dinoflagellata	Dinophyceae	Peridiniales	Peridiniales	Peridinium	Phototrophic
b51da88dfa212679647e0be4de10b22a	TSAR	Dinoflagellata	Dinophyceae	Incerta_sedis	Incerta_sedis	Sabulodinium	Phototrophic
KJ763229.1.1798	TSAR	Dinoflagellata	Dinophyceae	Gymnodiniphycidae	Gymnodiniuclade	Paragymnodinium	Phototrophic
c3acb65300a42c3ad15f1608d1a354c4	TSAR	Dinoflagellata	Dinophyceae	Gymnodiniphycidae	Gymnodiniuclade	Paragymnodinium	Phototrophic
6c08a7bf8a2474cc7892d3f6af635fa8	TSAR	Dinoflagellata	Dinophyceae	Prorocentrales	Prorocentrales	Prorocentrum	Phototrophic
6b9039369a0db0da411c3efea320bbe6	TSAR	Dinoflagellata	Dinophyceae	Peridiniales	Peridiniales	Durinskia	Phototrophic
57171a395e973077333dabe2c7906dc1	TSAR	Dinoflagellata	Dinophyceae	Dinophysiales	Dinophysiales	Sinophysis	Phototrophic
DQ103837.1.1567	TSAR	Dinoflagellata	Dinophyceae	Dinophysiales	Dinophysiales	Sinophysis	Phototrophic
AB246744.1.1758	TSAR	Dinoflagellata	Dinophyceae	Peridiniales	Peridiniales	Blixaea	Phototrophic
e5b70548c7b68ab60c6d16bd6b896501	TSAR	Dinoflagellata	Incerta_sedis	Incerta_sedis	Incerta_sedis	Incerta_sedis	Phototrophic
8fefa75f25bc3b052a26e853b930e436	TSAR	Dinoflagellata	Dinophyceae	Peridiniphycidae	Thoracosphaeraceae	NA	NA
AY590486.1.1803	TSAR	Dinoflagellata	Dinophyceae	Peridiniphycidae	Thoracosphaeraceae	Pfiesteria	Phototrophic
DQ991374.1.1800	TSAR	Dinoflagellata	Dinophyceae	Peridiniphycidae	Thoracosphaeraceae	NA	NA
AY121856.1.1792	TSAR	Dinoflagellata	Dinophyceae	Peridiniphycidae	Thoracosphaeraceae	Pfiesteria	Phototrophic
JN090875.1.1798	TSAR	Dinoflagellata	Dinophyceae	Peridiniphycidae	Thoracosphaeraceae	NA	NA
c3b7d64105fb1233f11b2afc93c26169	TSAR	Dinoflagellata	Dinophyceae	Peridiniphycidae	Thoracosphaeraceae	NA	NA
KC315836.1.1644	TSAR	Dinoflagellata	Dinophyceae	Peridiniphycidae	Thoracosphaeraceae	NA	NA
KJ757912.1.1798	TSAR	Dinoflagellata	Dinophyceae	Peridiniphycidae	Thoracosphaeraceae	Scrippsiella	Phototrophic
e656cf88dc44541aa493aff03daad123	TSAR	Dinoflagellata	Dinophyceae	Peridiniphycidae	Thoracosphaeraceae	Thoracosphaeraceae	Phototrophic
634c4ed90d01f948d3a6598d8f5f7aec	TSAR	Dinoflagellata	Dinophyceae	Gymnodiniphycidae	Gymnodiniphycidae	Moestrupia	Phototrophic
8b4664b911332e956669d586d1bb0dc6	TSAR	Dinoflagellata	Dinophyceae	Gymnodiniphycidae	Kareniaceae	Karlodinium	Phototrophic
KC488415.1.1696	TSAR	Dinoflagellata	Dinophyceae	Gymnodiniphycidae	Kareniaceae	Karlodinium	Phototrophic
JQ439940.1.1798	TSAR	Dinoflagellata	Dinophyceae	Gymnodiniphycidae	Tovelliaceae	Esoptrodinium	Phototrophic
JQ996385.1.1805	TSAR	Dinoflagellata	Dinophyceae	Dinophysiales	Dinophysiales	Phalacroma	Phototrophic
fd4d645ce87c50f2208eeac0804e1d13	TSAR	Dinoflagellata	Dinophyceae	Gymnodiniphycidae	Suessiaceae	Pelagodinium	Phototrophic
JN098199.1.1537	TSAR	Dinoflagellata	Dinophyceae	Gymnodiniphycidae	Suessiaceae	Symbiodinium	Phototrophic
JX457422.1.1496	TSAR	Dinoflagellata	Dinophyceae	Gymnodiniphycidae	Suessiaceae	Pelagodinium	Phototrophic
52277808052d382cbb84af4e7c73ed32	TSAR	Dinoflagellata	Dinophyceae	Gymnodiniphycidae	Gymnodiniuclade	NA	NA
a1cea5ff11791b461265c63187796b7f	TSAR	Dinoflagellata	Dinophyceae	Gymnodiniphycidae	Gymnodiniuclade	Nusuttodinium	Phototrophic
FJ914479.1.1517	TSAR	Dinoflagellata	Dinophyceae	Gymnodiniphycidae	Gymnodiniuclade	NA	NA
MH732687.1.1731	TSAR	Dinoflagellata	Dinophyceae	Gymnodiniphycidae	Gymnodiniuclade	NA	NA
5b2bf0f0a88af65d80268f2a80d9bb68	TSAR	Dinoflagellata	Dinophyceae	Gymnodiniphycidae	Gymnodiniphycidae	Amphidinium	Phototrophic
AB103389.1.1752	TSAR	Dinoflagellata	Dinophyceae	Gymnodiniphycidae	Gymnodiniphycidae	Amphidinium	Phototrophic
5e20c4fc577a55b6e0c4f09ab52aec46	TSAR	Dinoflagellata	Dinophyceae	Gymnodiniphycidae	Gymnodiniphycidae	Amphidinium	Phototrophic
dd75dca7ab65577b9020dd3b20b5012e	TSAR	Dinoflagellata	Dinophyceae	Gymnodiniphycidae	Gymnodiniphycidae	Amphidinium	Phototrophic
3ab8f94ec356218c357530344e5aa5e6	TSAR	Dinoflagellata	Incerta_sedis	Incerta_sedis	Incerta_sedis	Haplozoon	Phototrophic
7ace85d1d0d5c48edf9879975e73c9c3	TSAR	Dinoflagellata	Dinophyceae	Peridiniales	Peridiniales	Kryptoperidinium	Phototrophic
947d6afc34f13e698bb6040ce1e2c377	TSAR	Dinoflagellata	Dinophyceae	Gonyaulacales	Gonyaulacales	Coolia	Phototrophic
0624a5a3498efb32cdcba11d17264ee8	TSAR	Dinoflagellata	Dinophyceae	Prorocentrales	Prorocentrales	Prorocentrum	Phototrophic
JF826336.1.1604	TSAR	Protalveolata	Syndiniales	Syndiniales	SyndinialeGrouI	SyndinialeGrouI	Parasitic
DQ386760.1.1531	TSAR	Dinoflagellata	Dinophyceae	Gymnodiniphycidae	Kareniaceae	Karlodinium	Phototrophic
d1defa4f0c7d54a545e6f86ca42a6d39	TSAR	Dinoflagellata	Dinophyceae	Gymnodiniphycidae	Kareniaceae	Karlodinium	Phototrophic
3c512e9a77a838a8648520ac675d0b03	TSAR	Ciliophora	Intramacronucleata	Spirotrichea	Euplotia	Euplotes	Consumers
8456848239f7d5f09057706b472c9f6f	TSAR	Ciliophora	Intramacronucleata	Spirotrichea	Euplotia	Euplotes	Consumers
a73f50329c864db456e0787c6fe72a9d	TSAR	Ciliophora	Intramacronucleata	Spirotrichea	Euplotia	Euplotes	Consumers
c67f7aa00eae664a6aa6f0051adb3a49	TSAR	Ciliophora	Intramacronucleata	Spirotrichea	Euplotia	Euplotes	Consumers
632e958c4e069ac932492863cbb5e407	CRuMs	Rigifilida	Rigifilida	Rigifilida	Rigifilida	Rigifilida	Consumers
AY268038.1.1731	CRuMs	Rigifilida	Rigifilida	Rigifilida	Rigifilida	Rigifilida	Consumers
2e994a39264a4901b51f8197d07b19fd	CRuMs	Rigifilida	Rigifilida	Rigifilida	Rigifilida	Rigifilida	Consumers
7f581082d1014b6ac0c92c88cdc20362	CRuMs	Rigifilida	Rigifilida	Rigifilida	Rigifilida	Rigifilida	Consumers
ce155f215a3864a96b32d696714d6ab3	CRuMs	Rigifilida	Rigifilida	Rigifilida	Rigifilida	Rigifilida	Consumers
21af87c7ba7ccca7e72df4bb5934e930	CRuMs	Rigifilida	Rigifilida	Rigifilida	Rigifilida	Rigifilida	Consumers
c0d54e0a6f7d5f97663b9e82848c637b	CRuMs	Rigifilida	Rigifilida	Rigifilida	Rigifilida	Rigifilida	Consumers
1648577cece7e556409d357373817b20	CRuMs	Rigifilida	Rigifilida	Rigifilida	Rigifilida	Rigifilida	Consumers
123846a7b5f57b73817f3a84161b502a	CRuMs	Rigifilida	Rigifilida	Rigifilida	Rigifilida	Rigifilida	Consumers
7b46e6dd556a353b827bc0e36a2ebc81	CRuMs	Rigifilida	Rigifilida	Rigifilida	Rigifilida	Rigifilida	Consumers
afff594f673b5d1c0ef34c9a558238f7	CRuMs	Rigifilida	Rigifilida	Rigifilida	Rigifilida	Rigifilida	Consumers
3c5ffc323b20c6bfca11567688dbc213	CRuMs	Rigifilida	Rigifilida	Rigifilida	Rigifilida	Rigifilida	Consumers
966d92263c3012a063e61d942606788d	CRuMs	Rigifilida	Rigifilida	Rigifilida	Rigifilida	Rigifilida	Consumers
c7ee99cfe36883c7d9b29df72b8b5e69	Amoebozoa	Amoebozoa	Tubulinea	Arcellinida	Arcellinida	Arcellinida	Consumers
5e7fc828f66085e14d75a66f45b4ca68	Amoebozoa	Amoebozoa	Tubulinea	Arcellinida	Arcellina	Arcella	Consumers
ebacbdb0d66fbcdf49b602b9ef84cd4d	Amoebozoa	Amoebozoa	Tubulinea	Arcellinida	Arcellina	Arcella	Consumers
61be31f4d56dfea8d2db812df0eadcf8	Amoebozoa	Amoebozoa	Tubulinea	Arcellinida	Arcellina	Arcella	Consumers
5332bdc696a3f86dff0e0e82f7cc2af5	Amoebozoa	Amoebozoa	Tubulinea	Arcellinida	Arcellina	Arcella	Consumers
LC222939.1.1743	Amoebozoa	Amoebozoa	Tubulinea	Echinamoebida	Echinamoebida	Vermamoeba	Consumers
7f37f6e03609cfeac0b2306d663f429a	Amoebozoa	Amoebozoa	Tubulinea	Euamoebida	Euamoebida	BOLA868	Consumers
83d325d7987ccd800c4a2b3663a26491	Amoebozoa	Amoebozoa	Tubulinea	Euamoebida	Euamoebida	BOLA868	Consumers
9074a1e7afe8ec4ef6a4702f2284a7d7	Amoebozoa	Amoebozoa	Tubulinea	Euamoebida	Euamoebida	BOLA868	Consumers
318dcd6755e3b78184ed50831022c0be	Amoebozoa	Amoebozoa	Tubulinea	Euamoebida	Euamoebida	BOLA868	Consumers
98f3ed3ef030b725ad5865d23363acf5	Amoebozoa	Amoebozoa	Tubulinea	Euamoebida	Euamoebida	BOLA868	Consumers
0d102183da5c88ef9843362ae7fc1c2f	Amoebozoa	Amoebozoa	Tubulinea	Euamoebida	Euamoebida	BOLA868	Consumers
0d58e6c2d859a1195de6b06bebabfb87	Amoebozoa	Amoebozoa	Tubulinea	Euamoebida	Euamoebida	BOLA868	Consumers
5ca438fcb0fa7e429e6473a11cf2e4d7	Amoebozoa	Amoebozoa	Tubulinea	Euamoebida	Euamoebida	BOLA868	Consumers
9f97cf262951026e76650153f026dedb	Amoebozoa	Amoebozoa	Tubulinea	Euamoebida	Euamoebida	BOLA868	Consumers
737e0ff8c2ee03e4f07e03d53f880217	Amoebozoa	Amoebozoa	Tubulinea	Euamoebida	Euamoebida	BOLA868	Consumers
cd936a06f1d49ecd0737be2ae113f393	Amoebozoa	Amoebozoa	Tubulinea	Euamoebida	Euamoebida	BOLA868	Consumers
37b57d6de10f9e172f14bb6984e64037	Amoebozoa	Amoebozoa	Tubulinea	Euamoebida	Euamoebida	BOLA868	Consumers
9a592335c08e69b63751eafdfdbd459a	Amoebozoa	Amoebozoa	Tubulinea	Euamoebida	Euamoebida	BOLA868	Consumers
93fcaabee596a5816a50f8c6115226d1	Amoebozoa	Amoebozoa	Tubulinea	Euamoebida	Euamoebida	BOLA868	Consumers
0ac4a0e668d83ae34ea0fd69c871710e	Amoebozoa	Amoebozoa	Tubulinea	Euamoebida	Euamoebida	BOLA868	Consumers
77f7783ea8eb2fc8ad374244a83398c8	Amoebozoa	Amoebozoa	Tubulinea	Euamoebida	Euamoebida	Copromyxa	Consumers
6bd26b68fba09de048d6c81e4e6f6116	Amoebozoa	Amoebozoa	Tubulinea	Euamoebida	Euamoebida	Euamoebida	Consumers
19ed724bf38b9cef9fa00294d36a4045	Amoebozoa	Amoebozoa	Tubulinea	Euamoebida	Euamoebida	Euamoebida	Consumers
a692820e8edf5f0384c433b24adba33a	Amoebozoa	Amoebozoa	Tubulinea	Euamoebida	Euamoebida	Euamoebida	Consumers
879ad75fb75b9f48ebb3359de01b3eb9	Amoebozoa	Amoebozoa	Tubulinea	Euamoebida	Euamoebida	NA	Consumers
ef1c9cbbf3d228e40f94a93f6322c035	Amoebozoa	Amoebozoa	Tubulinea	Euamoebida	Euamoebida	NA	Consumers
AY187926.1.1504	TSAR	Ciliophora	Postciliodesmatophora	Karyorelictea	Karyorelictea	Geleia	Consumers
909c9cc53040813747d2575fffcbf6c1	TSAR	Ciliophora	Postciliodesmatophora	Karyorelictea	Karyorelictea	Loxodes	Consumers
6cf73cd96d3075aaa5a04daa79187171	TSAR	Ciliophora	Postciliodesmatophora	Karyorelictea	Karyorelictea	Loxodes	Consumers
67a52b1d4553d343820f369ee3e4c2c5	TSAR	Ciliophora	Postciliodesmatophora	Karyorelictea	Karyorelictea	Loxodes	Consumers
U24248.1.1669	TSAR	Ciliophora	Postciliodesmatophora	Karyorelictea	Karyorelictea	Loxodes	Consumers
8cf8f746d72095c2c581db7ecd96b0d5	TSAR	Ciliophora	Postciliodesmatophora	Karyorelictea	Karyorelictea	Karyorelictea	Consumers
143107dd681df38369523669c6e195a1	TSAR	Ciliophora	Postciliodesmatophora	Karyorelictea	Karyorelictea	Karyorelictea	Consumers
AB505471.1.1622	TSAR	Ciliophora	Postciliodesmatophora	Karyorelictea	Karyorelictea	Karyorelictea	Consumers
22e9368feb3de48ac92f6ca2c4947af2	TSAR	Ciliophora	Postciliodesmatophora	Karyorelictea	Karyorelictea	Karyorelictea	Consumers
8e6e8c558c23a5c5db769118938e15be	TSAR	Ciliophora	Postciliodesmatophora	Karyorelictea	Karyorelictea	Karyorelictea	Consumers
AY179972.1.1747	TSAR	Apicomplexa	NoveApicomplexClas1	NoveApicomplexClas1	NoveApicomplexClas1	NoveApicomplexClas1	Parasitic
e28fede54fe964966ba6a6cdbe41f3cf	TSAR	Apicomplexa	NoveApicomplexClas1	NoveApicomplexClas1	NoveApicomplexClas1	NoveApicomplexClas1	Parasitic
8b58311801f97ac1586dcb75496cd89e	TSAR	Apicomplexa	Conoidasida	Gregarinasina	Eugregarinorida	NA	Parasitic
3cde647dc2a5623f59bf00f8038ed277	TSAR	Apicomplexa	Conoidasida	Gregarinasina	Eugregarinorida	Gregarina	Parasitic
dd7a95320fa0e04996375d53684f94ef	TSAR	Apicomplexa	Conoidasida	Gregarinasina	Eugregarinorida	Gregarina	Parasitic
25a82fad034840effcea3a1af12889c7	TSAR	Apicomplexa	Conoidasida	Gregarinasina	Eugregarinorida	Gregarina	Parasitic
db3d132f0d820cc35073aac3cccd7fc6	TSAR	Apicomplexa	Conoidasida	Gregarinasina	Eugregarinorida	Gregarina	Parasitic
642f673548bc0038344174f0f4bf2b99	TSAR	Apicomplexa	Conoidasida	Gregarinasina	Eugregarinorida	Gregarina	Parasitic
add52a380dda287d15d78b994c84807a	TSAR	Apicomplexa	Conoidasida	Gregarinasina	Eugregarinorida	Gregarina	Parasitic
3d24284c6f21a4095a24b1a06d09b48c	TSAR	Apicomplexa	Conoidasida	Gregarinasina	Eugregarinorida	Eugregarinorida	Parasitic
5e6445b4dd99ef3fa4d2ec79f938ccd6	TSAR	Apicomplexa	Conoidasida	Gregarinasina	Eugregarinorida	Gregarina	Parasitic
d897fe3fa2af7b9e3889b348c368cb5c	TSAR	Apicomplexa	Conoidasida	Gregarinasina	Eugregarinorida	Gregarina	Parasitic
c0dc07a4ffb44ac1941858631321e61f	TSAR	Apicomplexa	Conoidasida	Gregarinasina	NA	NA	Parasitic
148d3010786af48a8f577edecc69874c	Amoebozoa	Amoebozoa	Tubulinea	Echinamoebida	Echinamoebida	Echinamoebida	Consumers
1a63450ac8f2a94f57f8e4242d4fa1bd	Amoebozoa	Amoebozoa	Tubulinea	Echinamoebida	Echinamoebida	Echinamoebida	Consumers
aca18de6b289b1ee448079893de29afd	Cryptista	Cryptophyceae	Cryptophyceae	Cryptomonadales	Cryptomonadales	Rhodomonas	Phototrophic
f2a55ee26ff5556eac0a0b71fa6af16f	Obazoa	NucleariidaanFonticulgroup	NucleariidaanFonticulgroup	NucleariidaanFonticulgroup	Nucleariidae	Nuclearia	Consumers
c809bbff9f3385da353b91feab63087d	Obazoa	Holozoa	Choanoflagellida	Craspedida	Salpingoecidae	Salpingoeca	Consumers
KU727246.1.1740	Archaeplastida	Chlorophyta	Ulvophyceae	Ulvophyceae	Ulvophyceae	Ulvophyceae	Phototrophic
AB066647.1.1739	Archaeplastida	Chlorophyta	Ulvophyceae	Ulvophyceae	Ulvophyceae	Ulvophyceae	Phototrophic
FJ715640.1.1783	Archaeplastida	Chlorophyta	Ulvophyceae	Ulvophyceae	Ulvophyceae	Ulvophyceae	Phototrophic
GQ243428.1.1778	Archaeplastida	Chlorophyta	Trebouxiophyceae	Trebouxiophyceae	Trebouxiophyceae	Trebouxiophyceae	Phototrophic
4f32f30e114bcac01d984ba3233bbe49	Archaeplastida	Chlorophyta	Trebouxiophyceae	Trebouxiophyceae	Trebouxiophyceae	Trebouxiophyceae	Phototrophic
9bfd46e3e5cbdeaf5c2a6c28c4fcabb8	Archaeplastida	Chlorophyta	Trebouxiophyceae	Trebouxiophyceae	Trebouxiophyceae	Trebouxiophyceae	Phototrophic
AF228691.1.1757	Archaeplastida	Chlorophyta	Trebouxiophyceae	Trebouxiophyceae	Trebouxiophyceae	Trebouxiophyceae	Phototrophic
AJ829664.1.2152	Archaeplastida	Phragmoplastophyta	Zygnematophyceae	Zygnematophyceae	Zygnematophyceae	Zygnematophyceae	Phototrophic
1b82cd9080ae7873f284de455d32868c	Archaeplastida	Phragmoplastophyta	Zygnematophyceae	Zygnematophyceae	Zygnematophyceae	Zygnematophyceae	Phototrophic
AF352232.1.2224	Archaeplastida	Phragmoplastophyta	Zygnematophyceae	Zygnematophyceae	Zygnematophyceae	Zygnematophyceae	Phototrophic
4df779e1312040d7032c63fab2319edc	Archaeplastida	Phragmoplastophyta	Zygnematophyceae	Zygnematophyceae	Zygnematophyceae	Zygnematophyceae	Phototrophic
AF352221.1.2253	Archaeplastida	Phragmoplastophyta	Zygnematophyceae	Zygnematophyceae	Zygnematophyceae	Zygnematophyceae	Phototrophic
AF115442.1.2194	Archaeplastida	Phragmoplastophyta	Zygnematophyceae	Zygnematophyceae	Zygnematophyceae	Zygnematophyceae	Phototrophic
54160dd8d91d275102aec31d166998f2	Archaeplastida	Phragmoplastophyta	Zygnematophyceae	Zygnematophyceae	Zygnematophyceae	Zygnematophyceae	Phototrophic
FR852597.1.1764	Archaeplastida	Phragmoplastophyta	Zygnematophyceae	Zygnematophyceae	Zygnematophyceae	Zygnematophyceae	Phototrophic
a85f45c0b606093b6f798a33345fa56c	Archaeplastida	Phragmoplastophyta	Zygnematophyceae	Zygnematophyceae	Zygnematophyceae	Zygnematophyceae	Phototrophic
AJ853447.1.1753	Archaeplastida	Phragmoplastophyta	Zygnematophyceae	Zygnematophyceae	Zygnematophyceae	Zygnematophyceae	Phototrophic
X70705.1.2337	Archaeplastida	Phragmoplastophyta	Zygnematophyceae	Zygnematophyceae	Zygnematophyceae	Zygnematophyceae	Phototrophic
AJ853450.1.1758	Archaeplastida	Phragmoplastophyta	Zygnematophyceae	Zygnematophyceae	Zygnematophyceae	Zygnematophyceae	Phototrophic
1f8f1efe07b1c077024d397efb2bff0e	Archaeplastida	Chlorophyta	Incerta_sedis	Incerta_sedis	Incerta_sedis	Picocystis	Phototrophic
1cf34ae8b7216bcdd2a5613c733da1a7	Archaeplastida	Chlorophyta	Mamiellophyceae	Dolichomastigales	Dolichomastigales	Crustomastix	Phototrophic
KC583090.1.1775	Archaeplastida	Chlorophyta	Mamiellophyceae	Mamiellophyceae	Mamiellophyceae	Mamiellophyceae	Phototrophic
42f6165fe96ad69eb33ed1e14d327ca0	Archaeplastida	Chlorophyta	Nephroselmidophyceae	Nephroselmidales	Nephroselmidales	Nephroselmis	Phototrophic
5f7265f42a3201e510ce924d5af19fd4	Archaeplastida	Chlorophyta	Prasinophytae	Prasinophytae	Prasinophytae	Prasinophytae	Phototrophic
6d986666c90a09d76cb1869dcb2b5419	Archaeplastida	Chlorophyta	Prasinophytae	Prasinophytae	Prasinophytae	Prasinophytae	Phototrophic
AJ581911.1.1785	Archaeplastida	Chlorophyta	Trebouxiophyceae	Trebouxiophyceae	Trebouxiophyceae	Trebouxiophyceae	Phototrophic
FJ532296.1.1598	Archaeplastida	Chlorophyta	Ulvophyceae	Ulvophyceae	Ulvophyceae	Ulvophyceae	Phototrophic
752c5eaf198efe085a64d16c8a184bfa	Archaeplastida	Chlorophyta	Trebouxiophyceae	Trebouxiophyceae	Trebouxiophyceae	Trebouxiophyceae	Phototrophic
AY220572.1.1690	Archaeplastida	Chlorophyta	Chlorophyceae	Chlorophyceae	Chlorophyceae	Chlorophyceae	Phototrophic
GQ330598.1.1453	Archaeplastida	Chlorophyta	Chlorophyceae	Chlorophyceae	Chlorophyceae	Chlorophyceae	Phototrophic
DQ413049.1.1749	Archaeplastida	Chlorophyta	Chlorophyceae	Chlorophyceae	Chlorophyceae	Chlorophyceae	Phototrophic
67c9c04b368d35a6b7bc5c188f8582b1	Archaeplastida	Chlorophyta	Chlorophyceae	Chlorophyceae	Chlorophyceae	Chlorophyceae	Phototrophic
2c9746cdbbee3c77a4cc125c765b8f9f	Archaeplastida	Chlorophyta	Chlorophyceae	Chlorophyceae	Chlorophyceae	Chlorophyceae	Phototrophic
f4119cc92c90dc1c134c6455efb40151	Archaeplastida	Chlorophyta	Chlorophyceae	Chlorophyceae	Chlorophyceae	Chlorophyceae	Phototrophic
DQ078297.1.1765	Archaeplastida	Chlorophyta	Chlorophyceae	Chlorophyceae	Chlorophyceae	Chlorophyceae	Phototrophic
DQ078298.1.1736	Archaeplastida	Chlorophyta	Chlorophyceae	Chlorophyceae	Chlorophyceae	Chlorophyceae	Phototrophic
EU439263.1.1807	Archaeplastida	Chlorophyta	Trebouxiophyceae	Trebouxiophyceae	Trebouxiophyceae	Trebouxiophyceae	Phototrophic
HQ317307.1.1565	Archaeplastida	Chlorophyta	Trebouxiophyceae	Trebouxiophyceae	Trebouxiophyceae	Trebouxiophyceae	Phototrophic
EU878373.1.1752	Archaeplastida	Chlorophyta	Trebouxiophyceae	Trebouxiophyceae	Trebouxiophyceae	Trebouxiophyceae	Phototrophic
AB055867.1.2742	Archaeplastida	Chlorophyta	Trebouxiophyceae	Trebouxiophyceae	Trebouxiophyceae	Trebouxiophyceae	Phototrophic
KY054971.1.1711	Archaeplastida	Chlorophyta	Trebouxiophyceae	Trebouxiophyceae	Trebouxiophyceae	Trebouxiophyceae	Phototrophic
JQ315544.1.1673	Archaeplastida	Chlorophyta	Trebouxiophyceae	Trebouxiophyceae	Trebouxiophyceae	Trebouxiophyceae	Phototrophic
AB080307.1.1791	Archaeplastida	Chlorophyta	Trebouxiophyceae	Trebouxiophyceae	Trebouxiophyceae	Trebouxiophyceae	Phototrophic
KU561155.1.1715	Archaeplastida	Chlorophyta	Trebouxiophyceae	Trebouxiophyceae	Trebouxiophyceae	Trebouxiophyceae	Phototrophic
KM055115.1.1791	Archaeplastida	Chlorophyta	Trebouxiophyceae	Trebouxiophyceae	Trebouxiophyceae	Trebouxiophyceae	Phototrophic
AB017435.1.1786	Archaeplastida	Chlorophyta	Trebouxiophyceae	Trebouxiophyceae	Trebouxiophyceae	Trebouxiophyceae	Phototrophic
FR865758.2.1769	Archaeplastida	Chlorophyta	Chlorophyceae	Chlorophyceae	Chlorophyceae	Chlorophyceae	Phototrophic
AY044648.1.1753	Archaeplastida	Chlorophyta	Chlorophyceae	Chlorophyceae	Chlorophyceae	Chlorophyceae	Phototrophic
AB360742.1.1743	Archaeplastida	Chlorophyta	Chlorophyceae	Chlorophyceae	Chlorophyceae	Chlorophyceae	Phototrophic
GU067989.1.1789	Archaeplastida	Chlorophyta	Chlorophyceae	Chlorophyceae	Chlorophyceae	Chlorophyceae	Phototrophic
HE617183.1.2238	Archaeplastida	Chlorophyta	Trebouxiophyceae	Trebouxiophyceae	Trebouxiophyceae	Trebouxiophyceae	Phototrophic
KM116465.1.2209	Archaeplastida	Chlorophyta	Trebouxiophyceae	Trebouxiophyceae	Trebouxiophyceae	Trebouxiophyceae	Phototrophic
3dbd4021161c791dc41e4dd8980f08f4	Archaeplastida	Chlorophyta	Chlorophyceae	Chaetopeltidales	Chaetopeltidales	Chaetopeltidales	Phototrophic
HJ800253.3.1793	Archaeplastida	Chlorophyta	Trebouxiophyceae	Trebouxiophyceae	Trebouxiophyceae	Trebouxiophyceae	Phototrophic
AB080305.1.1791	Archaeplastida	Chlorophyta	Trebouxiophyceae	Trebouxiophyceae	Trebouxiophyceae	Trebouxiophyceae	Phototrophic
0729ed22de34b7d9caa8cc9c1f2a12d7	Archaeplastida	Chlorophyta	Ulvophyceae	Ulvophyceae	Ulvophyceae	Ulvophyceae	Phototrophic
4393871a7d5a64676da3f9c57a1335a4	Archaeplastida	Chlorophyta	Ulvophyceae	Ulvophyceae	Ulvophyceae	Ulvophyceae	Phototrophic
GQ121000.1.1621	Archaeplastida	Chlorophyta	Ulvophyceae	Ulvophyceae	Ulvophyceae	Ulvophyceae	Phototrophic
66f0b4ea6163a82c0271f4bb0c4faa14	Archaeplastida	Chlorophyta	Trebouxiophyceae	Trebouxiophyceae	Trebouxiophyceae	Trebouxiophyceae	Phototrophic
GBEZ01020067.47.1839	Archaeplastida	Chlorophyta	Chlorodendrophyceae	Chlorodendrales	Chlorodendrales	Tetraselmis	Phototrophic
X68484.4.1753	Archaeplastida	Chlorophyta	Chlorodendrophyceae	Chlorodendrales	Chlorodendrales	Tetraselmis	Phototrophic
c30856eb17f25249dc1883de092064b2	Archaeplastida	Chlorophyta	Chlorodendrophyceae	Chlorodendrales	Chlorodendrales	Tetraselmis	Phototrophic
673664aff874631b5d2a8c590885f572	Archaeplastida	Chlorophyta	Chlorophyceae	Chlorophyceae	Chlorophyceae	Chlorophyceae	Phototrophic
dccca546dc36b0df310c445af77d4abe	Archaeplastida	Chlorophyta	Chlorophyceae	Chlorophyceae	Chlorophyceae	Chlorophyceae	Phototrophic
fe030614df2acefbdae62c89f34aef2a	Archaeplastida	Chlorophyta	Chlorophyceae	Chlorophyceae	Chlorophyceae	Chlorophyceae	Phototrophic
AY220085.1.1788	Archaeplastida	Chlorophyta	Chlorophyceae	Chlorophyceae	Chlorophyceae	Chlorophyceae	Phototrophic
b1a356a2969e043f56087f4d9fe0289e	Archaeplastida	Chlorophyta	Chlorophyceae	Chlorophyceae	Chlorophyceae	Chlorophyceae	Phototrophic
AY220083.1.1788	Archaeplastida	Chlorophyta	Chlorophyceae	Chlorophyceae	Chlorophyceae	Chlorophyceae	Phototrophic
07b31d991ba704ec2775c3b08e2650c1	Archaeplastida	Chlorophyta	Chlorophyceae	Chlorophyceae	Chlorophyceae	Chlorophyceae	Phototrophic
LC086346.1.1743	Archaeplastida	Chlorophyta	Chlorophyceae	Chlorophyceae	Chlorophyceae	Chlorophyceae	Phototrophic
fdfe7dfd87abbfdb604b691079127922	Archaeplastida	Chlorophyta	Chlorophyceae	Chlorophyceae	Chlorophyceae	Chlorophyceae	Phototrophic
KU355799.1.1689	Archaeplastida	Chlorophyta	Chlorophyceae	Chlorophyceae	Chlorophyceae	Chlorophyceae	Phototrophic
LC086364.1.1742	Archaeplastida	Chlorophyta	Chlorophyceae	Chlorophyceae	Chlorophyceae	Chlorophyceae	Phototrophic
KM020127.1.1762	Archaeplastida	Chlorophyta	Chlorophyceae	Chlorophyceae	Chlorophyceae	Chlorophyceae	Phototrophic
EF023314.1.1782	Archaeplastida	Chlorophyta	Chlorophyceae	Chlorophyceae	Chlorophyceae	Chlorophyceae	Phototrophic
3ce9c10de9d03490555e896d8fcf6afc	Archaeplastida	Chlorophyta	Chlorophyceae	Chlorophyceae	Chlorophyceae	Chlorophyceae	Phototrophic
LC086341.1.1743	Archaeplastida	Chlorophyta	Chlorophyceae	Chlorophyceae	Chlorophyceae	Chlorophyceae	Phototrophic
LC380260.1.1743	Archaeplastida	Chlorophyta	Chlorophyceae	Chlorophyceae	Chlorophyceae	Chlorophyceae	Phototrophic
AY220084.1.1788	Archaeplastida	Chlorophyta	Chlorophyceae	Chlorophyceae	Chlorophyceae	Chlorophyceae	Phototrophic
993dea95ab925150bfbbd071ec7cc035	Archaeplastida	Chlorophyta	Chlorophyceae	Chlorophyceae	Chlorophyceae	Chlorophyceae	Phototrophic
AB701548.1.1643	Archaeplastida	Chlorophyta	Chlorophyceae	Chlorophyceae	Chlorophyceae	Chlorophyceae	Phototrophic
ac2bfe2a18333b23302263cb05bb9de2	Archaeplastida	Chlorophyta	Chlorophyceae	Chlorophyceae	Chlorophyceae	Chlorophyceae	Phototrophic
e29f020b0a47895952cc5abb2817a5ce	Archaeplastida	Chlorophyta	Chlorophyceae	Chlorophyceae	Chlorophyceae	Chlorophyceae	Phototrophic
GU067985.1.1791	Archaeplastida	Phragmoplastophyta	Coleochaetophyceae	Chaetosphaeridiales	Chaetosphaeridiales	Chaetosphaeridium	Phototrophic
FR865573.2.1763	Archaeplastida	Chlorophyta	Chlorophyceae	Chlorophyceae	Chlorophyceae	Chlorophyceae	Phototrophic
LC425385.1.1702	Archaeplastida	Chlorophyta	Chlorophyceae	Chlorophyceae	Chlorophyceae	Chlorophyceae	Phototrophic
KM020031.1.1769	Archaeplastida	Chlorophyta	Chlorophyceae	Chlorophyceae	Chlorophyceae	Chlorophyceae	Phototrophic
KC149966.1.1759	Archaeplastida	Chlorophyta	Chlorophyceae	Chlorophyceae	Chlorophyceae	Chlorophyceae	Phototrophic
d8c6759dc7b2c6085571cbfd6d5de9b6	Archaeplastida	Chlorophyta	Chlorophyceae	Chlorophyceae	Chlorophyceae	Chlorophyceae	Phototrophic
LC086368.1.1742	Archaeplastida	Chlorophyta	Chlorophyceae	Chlorophyceae	Chlorophyceae	Chlorophyceae	Phototrophic
AB248252.1.1721	Archaeplastida	Chlorophyta	Chlorophyceae	Chlorophyceae	Chlorophyceae	Chlorophyceae	Phototrophic
MF101220.1.1788	Archaeplastida	Chlorophyta	Chlorophyceae	Chlorophyceae	Chlorophyceae	Chlorophyceae	Phototrophic
59cff518c5c6be3c31b084c1aaaa2d8e	Archaeplastida	Chlorophyta	Chlorophyceae	Chlorophyceae	Chlorophyceae	Chlorophyceae	Phototrophic
e54c8646aabc2f5345491b1e673a0580	Archaeplastida	Chlorophyta	Chlorophyceae	Chlorophyceae	Chlorophyceae	Chlorophyceae	Phototrophic
AB701530.1.1596	Archaeplastida	Chlorophyta	Chlorophyceae	Chlorophyceae	Chlorophyceae	Chlorophyceae	Phototrophic
0b5dc19d5027fe3b121f3cb5994c6442	Archaeplastida	Chlorophyta	Chlorophyceae	Chlorophyceae	Chlorophyceae	Chlorophyceae	Phototrophic
AB701520.1.1596	Archaeplastida	Chlorophyta	Chlorophyceae	Chlorophyceae	Chlorophyceae	Chlorophyceae	Phototrophic
f9c2dbc3ed0cee7b3d9540c9055e965f	Archaeplastida	Chlorophyta	Chlorophyceae	Chlorophyceae	Chlorophyceae	Chlorophyceae	Phototrophic
3a6971a5d55b2b908269ebcf6b92be3e	Archaeplastida	Chlorophyta	Chlorophyceae	Chlorophyceae	Chlorophyceae	Chlorophyceae	Phototrophic
8a167f95dc873d2862d7d5c5af914f3d	Archaeplastida	Chlorophyta	Chlorophyceae	Chlorophyceae	Chlorophyceae	Chlorophyceae	Phototrophic
a0ead9769ab1260eea3807b4ad0265c9	Archaeplastida	Chlorophyta	Chlorophyceae	Chlorophyceae	Chlorophyceae	Chlorophyceae	Phototrophic
JN903981.1.1747	Archaeplastida	Chlorophyta	Chlorophyceae	Chlorophyceae	Chlorophyceae	Chlorophyceae	Phototrophic
6e6fb3238d77753f075909946ab82fce	Archaeplastida	Chlorophyta	Chlorophyceae	Chlorophyceae	Chlorophyceae	Chlorophyceae	Phototrophic
e2dd373f05113c14a1f8610dc6c4d800	Archaeplastida	Chlorophyta	Chlorophyceae	Chlorophyceae	Chlorophyceae	Chlorophyceae	Phototrophic
AJ781311.1.1776	Archaeplastida	Chlorophyta	Chlorophyceae	Chlorophyceae	Chlorophyceae	Chlorophyceae	Phototrophic
AB290341.1.1746	Archaeplastida	Chlorophyta	Chlorophyceae	Chlorophyceae	Chlorophyceae	Chlorophyceae	Phototrophic
HQ191368.1.2407	Archaeplastida	Chlorophyta	Chlorophyceae	Chlorophyceae	Chlorophyceae	Chlorophyceae	Phototrophic
c8a493611004084ea29f20f5e677471b	Archaeplastida	Chlorophyta	Chlorophyceae	Chlorophyceae	Chlorophyceae	Chlorophyceae	Phototrophic
82f70b0ef855f5fe0f50e4543cddbf29	Archaeplastida	Chlorophyta	Chlorophyceae	Chlorophyceae	Chlorophyceae	Chlorophyceae	Phototrophic
8900d406209910715862dc54abab7333	Archaeplastida	Chlorophyta	Chlorophyceae	Chlorophyceae	Chlorophyceae	Chlorophyceae	Phototrophic
AJ271859.1.3367	Archaeplastida	Chlorophyta	Chlorophyceae	Chlorophyceae	Chlorophyceae	Chlorophyceae	Phototrophic
00fffd4ae63472cb9b4c94ce814f7084	Archaeplastida	Chlorophyta	Chlorophyceae	Chlorophyceae	Chlorophyceae	Chlorophyceae	Phototrophic
AB037082.1.2710	Archaeplastida	Chlorophyta	Chlorophyceae	Chlorophyceae	Chlorophyceae	Chlorophyceae	Phototrophic
JQ315186.1.1636	Archaeplastida	Chlorophyta	Chlorophyceae	Chlorophyceae	Chlorophyceae	Chlorophyceae	Phototrophic
99593147e81d395ba90257e701027de0	Archaeplastida	Chlorophyta	Chlorophyceae	Chlorophyceae	Chlorophyceae	Chlorophyceae	Phototrophic
AB917139.1.2177	Archaeplastida	Chlorophyta	Chlorophyceae	Chlorophyceae	Chlorophyceae	Chlorophyceae	Phototrophic
KF574396.73.1696	Archaeplastida	Chlorophyta	Chlorophyceae	Chlorophyceae	Chlorophyceae	Chlorophyceae	Phototrophic
FR865714.2.1766	Archaeplastida	Chlorophyta	Chlorophyceae	Chlorophyceae	Chlorophyceae	Chlorophyceae	Phototrophic
JX296639.1.1721	Archaeplastida	Chlorophyta	Chlorophyceae	Chlorophyceae	Chlorophyceae	Chlorophyceae	Phototrophic
JN090910.1.1642	Archaeplastida	Chlorophyta	Chlorophyceae	Chlorophyceae	Chlorophyceae	Chlorophyceae	Phototrophic
aa18043810b2936d34c31a62fe67b9d2	Archaeplastida	Chlorophyta	Chlorophyceae	Chlorophyceae	Chlorophyceae	Chlorophyceae	Phototrophic
X73995.1.1794	Archaeplastida	Chlorophyta	Chlorophyceae	Chlorophyceae	Chlorophyceae	Chlorophyceae	Phototrophic
AY195982.1.2473	Archaeplastida	Chlorophyta	Chlorophyceae	Chlorophyceae	Chlorophyceae	Chlorophyceae	Phototrophic
LC425384.1.2118	Archaeplastida	Chlorophyta	Chlorophyceae	Chlorophyceae	Chlorophyceae	Chlorophyceae	Phototrophic
db46591985de868ffc9105f02f99153f	Archaeplastida	Chlorophyta	Chlorophyceae	Chlorophyceae	Chlorophyceae	Chlorophyceae	Phototrophic
AB037097.1.2265	Archaeplastida	Chlorophyta	Chlorophyceae	Chlorophyceae	Chlorophyceae	Chlorophyceae	Phototrophic
0317756a076a45b9ab4b66a07ab99f8f	Archaeplastida	Chlorophyta	Chlorophyceae	Chlorophyceae	Chlorophyceae	Chlorophyceae	Phototrophic
986da2a9d6448ded2511d74ca088999a	Archaeplastida	Chlorophyta	Chlorophyceae	Chlorophyceae	Chlorophyceae	Chlorophyceae	Phototrophic
AB055800.1.1790	Archaeplastida	Chlorophyta	Chlorophyceae	Chlorophyceae	Chlorophyceae	Chlorophyceae	Phototrophic
8f90caa015069c6a83bb38e298c88b72	Archaeplastida	Chlorophyta	Chlorophyceae	Chlorophyceae	Chlorophyceae	Chlorophyceae	Phototrophic
b96c7e1c603986077d65b68450393535	Archaeplastida	Chlorophyta	Chlorophyceae	Chlorophyceae	Chlorophyceae	Chlorophyceae	Phototrophic
26ae8b9b46c8b0abef8336e777689f57	Archaeplastida	Chlorophyta	Chlorophyceae	Chlorophyceae	Chlorophyceae	Chlorophyceae	Phototrophic
AY197622.1.1756	Archaeplastida	Chlorophyta	Chlorophyceae	Chlorophyceae	Chlorophyceae	Chlorophyceae	Phototrophic
46f3dce131020e3e55094a568dc06068	Archaeplastida	Chlorophyta	Chlorophyceae	Chlorophyceae	Chlorophyceae	Chlorophyceae	Phototrophic
M62861.1.1794	Archaeplastida	Chlorophyta	Chlorophyceae	Chlorophyceae	Chlorophyceae	Chlorophyceae	Phototrophic
4d5787b66355f8f9720bc4c5c0ebd6e4	Archaeplastida	Chlorophyta	Chlorophyceae	Chlorophyceae	Chlorophyceae	Chlorophyceae	Phototrophic
32a9ff313522f33c881653bfcd92cba8	Archaeplastida	Chlorophyta	Chlorophyceae	Chlorophyceae	Chlorophyceae	Chlorophyceae	Phototrophic
AY220088.1.1756	Archaeplastida	Chlorophyta	Chlorophyceae	Chlorophyceae	Chlorophyceae	Chlorophyceae	Phototrophic
d70424dc2b92ce716cd7794cfebfd7a6	Archaeplastida	Chlorophyta	Pedinophyceae	Pedinomonadales	Pedinomonadales	Pedinomonas	Phototrophic
58a5ce7d1dd1e19e7c0ef7bd06f27407	Archaeplastida	Chlorophyta	Pedinophyceae	Pedinomonadales	Pedinomonadales	Pedinomonas	Phototrophic
HE610133.1.1765	Archaeplastida	Chlorophyta	Pedinophyceae	Pedinomonadales	Pedinomonadales	Pedinomonas	Phototrophic
1e842ec3f4d99e1dae57eee5e138d7d3	Archaeplastida	Chlorophyta	Pedinophyceae	Pedinomonadales	Pedinomonadales	Pedinomonas	Phototrophic
d2de0103dcc96f04c3d2dc56e03e126d	Archaeplastida	Chlorophyta	Pedinophyceae	Pedinomonadales	Pedinomonadales	Pedinomonas	Phototrophic
AB290340.1.1726	Archaeplastida	Chlorophyta	Chlorophyceae	Chlorophyceae	Chlorophyceae	Chlorophyceae	Phototrophic
afd47c77eea99de1cea26b8381bbc20e	Archaeplastida	Chlorophyta	Chlorophyceae	Chlorophyceae	Chlorophyceae	Chlorophyceae	Phototrophic
7df55d87b476d1969bfdbd1656e12fed	Archaeplastida	Chlorophyta	Chlorophyceae	Chlorophyceae	Chlorophyceae	Chlorophyceae	Phototrophic
89c6449aba2affebef37f35dc5a18ec6	Archaeplastida	Chlorophyta	Chlorophyceae	Chlorophyceae	Chlorophyceae	Chlorophyceae	Phototrophic
FJ946901.1.1768	Archaeplastida	Chlorophyta	Chlorophyceae	Chlorophyceae	Chlorophyceae	Chlorophyceae	Phototrophic
fb2037e9a40753c8a9a74e5f3857c599	Archaeplastida	Chlorophyta	Chlorophyceae	Chlorophyceae	Chlorophyceae	Chlorophyceae	Phototrophic
bee46f288bcb22a94fd0ed648b3c4f98	Archaeplastida	Chlorophyta	Chlorophyceae	Chlorophyceae	Chlorophyceae	Chlorophyceae	Phototrophic
FR865563.2.1769	Archaeplastida	Chlorophyta	Chlorophyceae	Chlorophyceae	Chlorophyceae	Chlorophyceae	Phototrophic
6c367a9ec6a810d21504eb89e75a42d1	Archaeplastida	Chlorophyta	Chlorophyceae	Chlorophyceae	Chlorophyceae	Chlorophyceae	Phototrophic
U70594.1.1699	Archaeplastida	Chlorophyta	Chlorophyceae	Chlorophyceae	Chlorophyceae	Chlorophyceae	Phototrophic
17dd2e70e8739578d8176c6659e1ae8e	Archaeplastida	Chlorophyta	Chlorophyceae	Chlorophyceae	Chlorophyceae	Chlorophyceae	Phototrophic
4c4377f7acd1f47a8d67c78c789d0f82	Archaeplastida	Chlorophyta	Chlorophyceae	Chlorophyceae	Chlorophyceae	Chlorophyceae	Phototrophic
FR865555.2.1768	Archaeplastida	Chlorophyta	Chlorophyceae	Chlorophyceae	Chlorophyceae	Chlorophyceae	Phototrophic
fbc5b698482200686adf83a9345a41e0	Archaeplastida	Chlorophyta	Chlorophyceae	Chlorophyceae	Chlorophyceae	Chlorophyceae	Phototrophic
LC057295.1.1747	Archaeplastida	Chlorophyta	Chlorophyceae	Chlorophyceae	Chlorophyceae	Chlorophyceae	Phototrophic
d5f1126d1ac41dfbf0793e1c61d34e54	Archaeplastida	Chlorophyta	Chlorophyceae	Chlorophyceae	Chlorophyceae	Chlorophyceae	Phototrophic
cbf0e6f1442df8ac934cc602ed77f2cf	Archaeplastida	Chlorophyta	Chlorophyceae	Chlorophyceae	Chlorophyceae	Chlorophyceae	Phototrophic
eabe9abc7b77ef7a629139c885731713	Archaeplastida	Chlorophyta	Chlorophyceae	Chlorophyceae	Chlorophyceae	Chlorophyceae	Phototrophic
600138a26e2be10915eaedeefe9760c3	Archaeplastida	Chlorophyta	Chlorophyceae	Chlorophyceae	Chlorophyceae	Chlorophyceae	Phototrophic
b1799fbd4041d134a639364226e58711	Archaeplastida	Chlorophyta	Chlorophyceae	Chlorophyceae	Chlorophyceae	Chlorophyceae	Phototrophic
AY220564.1.2245	Archaeplastida	Chlorophyta	Chlorophyceae	Chlorophyceae	Chlorophyceae	Chlorophyceae	Phototrophic
LF939062.5.1789	Archaeplastida	Chlorophyta	Chlorophyceae	Chlorophyceae	Chlorophyceae	Chlorophyceae	Phototrophic
5c3a9fdcfac5562c7f1e2a531ebb9e62	Archaeplastida	Chlorophyta	Chlorophyceae	Chlorophyceae	Chlorophyceae	Chlorophyceae	Phototrophic
AB983625.1.1744	Archaeplastida	Chlorophyta	Chlorophyceae	Chlorophyceae	Chlorophyceae	Chlorophyceae	Phototrophic
AB049415.1.1740	Archaeplastida	Chlorophyta	Chlorophyceae	Chlorophyceae	Chlorophyceae	Chlorophyceae	Phototrophic
KM020099.1.1771	Archaeplastida	Chlorophyta	Chlorophyceae	Chlorophyceae	Chlorophyceae	Chlorophyceae	Phototrophic
120da28109970c634aa7fa44d9ec26b9	Archaeplastida	Chlorophyta	Chlorophyceae	Chlorophyceae	Chlorophyceae	Chlorophyceae	Phototrophic
1f78afba8d0902cf15b1c24403192221	Archaeplastida	Chlorophyta	Chlorophyceae	Chlorophyceae	Chlorophyceae	Chlorophyceae	Phototrophic
b30339194bf30d3b90934732794ba651	Archaeplastida	Chlorophyta	Chlorophyceae	Chlorophyceae	Chlorophyceae	Chlorophyceae	Phototrophic
4e673ad058931100b8fa3dd41802d054	Archaeplastida	Chlorophyta	Chlorophyceae	Chlorophyceae	Chlorophyceae	Chlorophyceae	Phototrophic
1d0da0545ff174e259f3f1128a6a967c	Archaeplastida	Phragmoplastophyta	Zygnematophyceae	Zygnematophyceae	Zygnematophyceae	Zygnematophyceae	Phototrophic
9b2e71dd349fc9bf5bda82c2b05129a5	Archaeplastida	Phragmoplastophyta	Zygnematophyceae	Zygnematophyceae	Zygnematophyceae	Zygnematophyceae	Phototrophic
JQ239050.1.1777	Archaeplastida	Phragmoplastophyta	Zygnematophyceae	Zygnematophyceae	Zygnematophyceae	Zygnematophyceae	Phototrophic
a44ecce0d38cc52da7e8485668a5c76c	Archaeplastida	Chlorophyta	Mamiellophyceae	Monomastigales	Monomastigales	Monomastix	Phototrophic
18a9f015b9e2d3b9a2395585d60472a5	TSAR	Ciliophora	Postciliodesmatophora	Heterotrichea	Heterotrichea	Blepharisma	Consumers
1b06cfbae2d5129b5a33953d022f1768	TSAR	Ciliophora	Postciliodesmatophora	Heterotrichea	Heterotrichea	Blepharisma	Consumers
LC150082.1.1722	TSAR	Ciliophora	Postciliodesmatophora	Heterotrichea	Heterotrichea	Blepharisma	Consumers
f5b0cdf07b68608ee066fdcc2c279d52	TSAR	Ciliophora	Postciliodesmatophora	Heterotrichea	Heterotrichea	Blepharisma	Consumers
LC150092.1.1713	TSAR	Ciliophora	Postciliodesmatophora	Heterotrichea	Heterotrichea	Blepharisma	Consumers
94d0fe4e535504a6b36fd43fa7d7d732	TSAR	Dinoflagellata	Dinophyceae	Peridiniales	Peridiniales	Amphidiniopsis	Consumers
f43524e43f9ae2b54212853945fe7077	Haptista	Prymnesiophyceae	Prymnesiophyceae	Isochrysidales	Isochrysidales	Isochrysis	Phototrophic
47f5e7177ec179d3273afe09970ba515	Haptista	Centrohelida	Centrohelida	Centrohelida	Acanthocystidae	Acanthocystidae	Consumers
AY749543.1.1625	Haptista	Centrohelida	Centrohelida	Centrohelida	Acanthocystidae	Acanthocystidae	Consumers
f7f5ecb88e4e2391d4283a82c7c9a5d8	Haptista	Centrohelida	Centrohelida	Centrohelida	Acanthocystidae	Pterocystis	Consumers
4a0be7b9d6e697b95597ce0b208d5905	Haptista	Centrohelida	Centrohelida	Centrohelida	Acanthocystidae	Pterocystis	Consumers
cf5fb322a5bf83d2c9c8227c14cce919	Haptista	Centrohelida	Centrohelida	Centrohelida	Acanthocystidae	Pterocystis	Consumers
55ea4f5e7f2ffb20b906e4bb1d13aa32	Haptista	Centrohelida	Centrohelida	Centrohelida	Heterophryidae	Heterophryidae	Consumers
7f83f182ea38067784a49407b7bdc57c	Haptista	Centrohelida	Centrohelida	Centrohelida	H1-10	H1-10	Consumers
f04e815bea7875d185b0522990c5d7c9	Haptista	Centrohelida	Centrohelida	Centrohelida	H1-10	H1-10	Consumers
63528635f7bc7508b6261b5d4975204c	Cryptista	Cryptophyceae	Cryptophyceae	Cryptomonadales	Cryptomonadales	Cryptomonas	Phototrophic
0922a80fcb045af87df4107840f82d24	Cryptista	Cryptophyceae	Cryptophyceae	Cryptomonadales	Cryptomonadales	Cryptomonas	Phototrophic
262ffcf4acfac82781ca66d940dda1ce	Cryptista	Cryptophyceae	Cryptophyceae	Cryptomonadales	Cryptomonadales	Cryptomonas	Phototrophic
KU900222.1.1768	Cryptista	Cryptophyceae	Cryptophyceae	Cryptomonadales	Cryptomonadales	Cryptomonas	Phototrophic
7f2bfa067178f57855555ec100c6ce81	Cryptista	Cryptophyceae	Cryptophyceae	Cryptomonadales	Cryptomonadales	Cryptomonas	Phototrophic
5a75594b19f06609cfc3159ba94fb86f	Cryptista	Cryptophyceae	Cryptophyceae	Cryptomonadales	Cryptomonadales	Cryptomonas	Phototrophic
47eac0c9e9721877512a6ae1a7868d41	Cryptista	Cryptophyceae	Cryptophyceae	Cryptomonadales	Cryptomonadales	Cryptomonas	Phototrophic
KF907404.1.1698	Cryptista	Cryptophyceae	Cryptophyceae	Cryptomonadales	Cryptomonadales	Cryptomonas	Phototrophic
6978ef8ab47ad2612d3aa85b701ede48	Cryptista	Cryptophyceae	Cryptophyceae	Cryptomonadales	Cryptomonadales	Cryptomonas	Phototrophic
a1d64634aadfe4c69210edee1ff902a5	Cryptista	Cryptophyceae	Cryptophyceae	Cryptomonadales	Cryptomonadales	Cryptomonas	Phototrophic
3bae4be7a685f2a09fc2aff2bdcc927b	Cryptista	Cryptophyceae	Cryptophyceae	Cryptomonadales	Cryptomonadales	Cryptomonas	Phototrophic
KU743828.1.1774	Cryptista	Cryptophyceae	Cryptophyceae	Cryptomonadales	Cryptomonadales	Proteomonas	Phototrophic
61989fe003102219ac9e1b1bf6d1b741	Cryptista	Cryptophyceae	Cryptophyceae	Cryptophyceae	Cryptophyceae	Goniomonas	Phototrophic
10f96ae9b047dce6cfe2d9e960e25c51	Cryptista	Cryptophyceae	Cryptophyceae	Cryptomonadales	Cryptomonadales	Cryptomonadales	Phototrophic
KC928312.1.1682	Cryptista	Cryptophyceae	Cryptophyceae	Cryptomonadales	Cryptomonadales	Chroomonas	Phototrophic
FPLK01000505.9.1620	Cryptista	Cryptophyceae	Cryptophyceae	Cryptomonadales	Cryptomonadales	Teleaulax	Phototrophic
18be869051b91231b6c616cbf686ab57	Cryptista	Cryptophyceae	Cryptophyceae	Cryptomonadales	Cryptomonadales	Cryptomonadales	Phototrophic
JQ315655.1.1650	Cryptista	Cryptophyceae	Cryptophyceae	Cryptomonadales	Cryptomonadales	Cryptomonadales	Phototrophic
1437f08c6edf404759f06b807b72bec2	Obazoa	LKM15	LKM15	LKM15	LKM15	LKM15	Parasitic
1f2391e65a3f9094938e244b56e258c9	Obazoa	LKM15	LKM15	LKM15	LKM15	LKM15	Parasitic
228da31262d7a32815dc629096890502	Obazoa	LKM15	LKM15	LKM15	LKM15	LKM15	Parasitic
5678c3e1a6e0988160f6cabcde1f2201	Obazoa	LKM15	LKM15	LKM15	LKM15	LKM15	Parasitic
72ae3cf303598f42cfc68dbbe607b21c	Obazoa	LKM15	LKM15	LKM15	LKM15	LKM15	Parasitic
934a24a50b05f23b5797fa5d5f5dac97	Obazoa	LKM15	LKM15	LKM15	LKM15	LKM15	Parasitic
FPLS01050367.9.1553	Obazoa	LKM15	LKM15	LKM15	LKM15	LKM15	Parasitic
b4f57080200fb9b16e5b37bc8d0f177a	Obazoa	LKM15	LKM15	LKM15	LKM15	LKM15	Parasitic
c71fb83e3c575349bd51df9701e3ed28	Obazoa	LKM15	LKM15	LKM15	LKM15	LKM15	Parasitic
