# Supplementary material for: Protist taxonomic and functional diversity in aquatic ecosystems of the Brazilian Atlantic Forest
Source: PeerJ. 2023 Aug 1;11:e15762. doi: 10.7717/peerj.15762 (PMC10402703; doi:10.7717/peerj.15762)
Supplement: Supplemental Information 2 — Observed = number of unique OTUs; Shannon = Shannon’s index H; Simpson = Simpson’s index D. [file peerj-11-15762-s002.xlsx]

## Sheet: Supp Table 2
Supplemental Table S2. Alpha-diversity metrics by sample. Observed = number of unique OTUs; Shannon = Shannon's index H; Simpson = Simpson's index D.
Sample ID	Observed	Shannon	Simpson
APA.Macacu	92	261497929956427	0.762874770019249
Araruama	62	301449164385459	0.919198736717168
Boa.Vista	195	481992467351181	0.986442859979002
Caceribu	57	220382352105361	0.757717063156624
Guapiaçu	265	450933591437364	0.967060955958082
Itaipu	160	355906123942698	0.929068149524435
Itaporani	33	281216741537927	0.875753162908526
Juturnaiba	10	0.941588471214692	0.381815909208033
Lagoa.Azul	70	374848394048208	0.965258771479713
Macacu	99	32031679554119	0.914061065254437
Marica	123	302776277612943	0.870233412144304
Maromba	79	381543936544453	0.951457025117739
Natural.Park.Taquara	55	317535167763567	0.899179970079987
ParNaSO.Soberbo	155	452061100045958	0.982679639433147
Paraíba.do.Sul	36	0.30593010537371	0.0845098036588174
Penedo	92	413505686486904	0.976815926806842
Piratininga	66	231191925142386	0.817703069165456
Rodrigo.de.Freitas	71	265635451954211	0.772353285138918
Saquarema	127	357212707684381	0.931746706055427
Sewer	72	335602418644528	0.916580783562185
Tingua.reserve	54	329459194445693	0.912669373826022
Três.Picos.Park	272	459321901367519	0.97488233421802
Veu.da.Noiva	132	433564466244917	0.976068256340241
