# Supplementary material for: Protist taxonomic and functional diversity in aquatic ecosystems of the Brazilian Atlantic Forest
Source: PeerJ. 2023 Aug 1;11:e15762. doi: 10.7717/peerj.15762 (PMC10402703; doi:10.7717/peerj.15762)
Supplement: Supplemental Information 3 [file peerj-11-15762-s003.xlsx]

## Sheet: total
Supplemental Table S3. The OTUs that occur at above 1% of relative abundance in the investigated environments and their functional roles
OTU Ids	Salinity	Abundance	Function
01dcd10faac42ff69aae633b03f65a33	freshwater	0.0336242299794661	Phototrophic
02f02a6d289c1a0efa8e6a79ddb6a898	freshwater	0.0280100334448161	Phototrophic
0434af7cb0c1adc0c27f1daea9b0b365	freshwater	0.0226434965771459	Consumers
0659647c65d008127627a73f4a9eab43	freshwater	0.0100214745884037	Consumers
06a178a67b3ae116378f400e4bb1fe32	freshwater	0.0156657963446475	Consumers
06d3fadfc2c4a8883d10d9852d20cf1b	freshwater	0.0127245087551377	Parasitic
07b31d991ba704ec2775c3b08e2650c1	freshwater	0.0114219712525667	Phototrophic
07b31d991ba704ec2775c3b08e2650c1	freshwater	0.040268787983596	Phototrophic
083ec3aaba1ebc4c889ed73bfff78e43	freshwater	0.0851439539347409	NA
09602e4756b09d0bc0f07a2485fd5d79	freshwater	0.0110584518167457	Consumers
0d58e6c2d859a1195de6b06bebabfb87	freshwater	0.0163243812532912	Consumers
0de97d7a276bc3971bc635ea15063cc7	freshwater	0.0233624131302676	Consumers
0efe4cff98e8468503d33d5e44b182b1	freshwater	0.0139349701393497	Parasitic
10d79cce1df59fd1d8545e38fe0ed172	freshwater	0.0776199616122841	Consumers
14039ae49e2ada3a0e974b9602bc5c73	freshwater	0.0121689334287759	Consumers
14b79829827f0525c29f39622cd8b433	freshwater	0.0446428571428571	Consumers
14b79829827f0525c29f39622cd8b433	freshwater	0.0148499210110585	Consumers
150db006bfb8d3d08f0e400b98ea5dba	brackish	0.0100571593951234	Phototrophic
160062887b1737ee0ec9725a5c747c9d	freshwater	0.0173775671406003	Parasitic
18a9f015b9e2d3b9a2395585d60472a5	freshwater	0.317108088761632	Consumers
18a9f015b9e2d3b9a2395585d60472a5	freshwater	0.0199785943631823	Consumers
18a9f015b9e2d3b9a2395585d60472a5	freshwater	0.0194312796208531	Consumers
197c06175c8f39bc59ad54302d4b3757	brackish	0.0446399478657543	Phototrophic
197c06175c8f39bc59ad54302d4b3757	brackish	0.22363105924596	Phototrophic
1998263efe9356a038e903e04ce95bb3	freshwater	0.0143427473014934	Consumers
1a63450ac8f2a94f57f8e4242d4fa1bd	freshwater	0.0111652977412731	Consumers
1b06cfbae2d5129b5a33953d022f1768	freshwater	0.0427373917823279	Consumers
1b06cfbae2d5129b5a33953d022f1768	freshwater	0.0145374449339207	Consumers
1b06cfbae2d5129b5a33953d022f1768	freshwater	0.0422451702159198	Consumers
1c814f13a2080eab2e2f532994b1509f	brackish	0.0300762300762301	Phototrophic
1d4b500b68b5b279c30924654e3fd87b	freshwater	0.0114057990930328	Phototrophic
1dba0f8dd20efc2416325c50d348e140	freshwater	0.0160542276132715	Consumers
1fd7fe846a66c6920edd46649b74733a	freshwater	0.0126811594202899	Phototrophic
259ee08c78ef54ed5b38befc0e9ceefc	freshwater	0.0152711953659821	Consumers
25a82fad034840effcea3a1af12889c7	freshwater	0.0121116377040548	Parasitic
293fe84e8afe533c89a8842bb8fe4d82	brackish	0.0101295130598365	Phototrophic
29548d4485e4fe8447f1487f93c24f96	freshwater	0.0107028184088477	Consumers
2ad6503151c2cd43adc5c4bab9809fac	freshwater	0.0126382306477093	Phototrophic
2bd6a4e4f08e1d46d5813d6ab23c9085	freshwater	0.0172619047619048	Consumers
2bf88c7bc460dc678a40fcd0271bf0ac	freshwater	0.0473933649289099	Consumers
3004d039b65d5c159f0b6ee5ae168143	freshwater	0.0539703605397036	Consumers
3004d039b65d5c159f0b6ee5ae168143	freshwater	0.0183946488294314	Consumers
31664942bc10dd8fc565f7f4643d7110	freshwater	0.0247498683517641	Consumers
32548bda78a88a973fa30013760ba5ce	brackish	0.0127342449895087	Consumers
339060b693f3991c3d84eda631d49d62	freshwater	0.012471283229406	Consumers
360a49a74bf6ec86620048995e3cbcbf	freshwater	0.0100334448160535	Phototrophic
3912c279363953b74655228a3d30f0d6	brackish	0.0794805548001088	Phototrophic
39391b29d1586e13fd99abafe65ef9f4	freshwater	0.0273357289527721	Phototrophic
39391b29d1586e13fd99abafe65ef9f4	freshwater	0.0143781807401551	Phototrophic
39391b29d1586e13fd99abafe65ef9f4	freshwater	0.0186784140969163	Phototrophic
3cde647dc2a5623f59bf00f8038ed277	freshwater	0.0119554761577573	Parasitic
3d0178baff9ef13816788ba15e7fca49	freshwater	0.0529955947136564	Consumers
3d0178baff9ef13816788ba15e7fca49	freshwater	0.0564257127328425	Consumers
3dbd4021161c791dc41e4dd8980f08f4	freshwater	0.0183747412008282	Phototrophic
3dfb25db72bc6e0cb4f44dabf56587ed	freshwater	0.0113169303530207	Phototrophic
40bb3ff42cff8fa50ce10509a4a2ea02	brackish	0.0203290726135437	Phototrophic
423d54213e1054fb5aec778450490997	brackish	0.0262643802908617	Phototrophic
42b01a7b7f9043b77e0513724d2cbb29	freshwater	0.0198678414096916	Phototrophic
42b01a7b7f9043b77e0513724d2cbb29	freshwater	0.0195167745441968	Phototrophic
42b01a7b7f9043b77e0513724d2cbb29	freshwater	0.0237735330493335	Phototrophic
42ee46ed79cf36a0228dd84ea1f70231	freshwater	0.012123745819398	Parasitic
432d16658002a8b1473892ac6960a980	freshwater	0.0139020537124803	Consumers
497bca502c1e3a0f17046203a89370a6	freshwater	0.0114531138153185	Parasitic
4c34e21cfad37e2dcaddd27718bd3980	freshwater	0.0358083201685097	Consumers
4c6d21c83caef188716efbb788f3df45	freshwater	0.0210110584518167	Consumers
4d6238c4430129fe5a840f57e55cba9e	freshwater	0.0180616740088106	Phototrophic
4d6238c4430129fe5a840f57e55cba9e	freshwater	0.0152675527447008	Phototrophic
4df779e1312040d7032c63fab2319edc	freshwater	0.0112936344969199	Phototrophic
4df779e1312040d7032c63fab2319edc	freshwater	0.0116806376253951	Phototrophic
4e427e8057e6b71e3cedd48d7a08c27b	freshwater	0.281354515050167	Consumers
4f32f30e114bcac01d984ba3233bbe49	freshwater	0.025879917184265	Phototrophic
4f7895e7bdf60060c8698246e0c65a81	freshwater	0.0107940263196806	Consumers
51caa9dae44ddd5f4d80f7c00935e170	freshwater	0.039616122840691	Consumers
51fe45e0c7e7b1413ee28b139c96c16f	freshwater	0.0142857142857143	Consumers
524a46e58eeab30a7e0e382d577c00c4	freshwater	0.0126382306477093	Consumers
5285eed65a5dfa8af3fc42ef627b6adf	brackish	0.0177454446559695	Consumers
546b23d561441128c584229f59577f4a	freshwater	0.016767748840528	Parasitic
558b260c82414cf2881552f1828ce270	freshwater	0.0163690476190476	Consumers
5678c3e1a6e0988160f6cabcde1f2201	freshwater	0.0493253704932537	Parasitic
56fcb5f2d22d26ecd3d9e97a64a499a8	freshwater	0.0426649163111257	Phototrophic
57171a395e973077333dabe2c7906dc1	brackish	0.0209268402154399	Phototrophic
59cff518c5c6be3c31b084c1aaaa2d8e	freshwater	0.014273127753304	Phototrophic
59cff518c5c6be3c31b084c1aaaa2d8e	freshwater	0.0175403923118731	Phototrophic
5ab22d5ada331ae0215db88b85668595	freshwater	0.0287519747235387	Consumers
5ba220005d388cd8552b9917b824c58a	brackish	0.0276720152298069	Phototrophic
60481d2bbdc40d2ebb91516c0dc1f28f	brackish	0.013598041881969	Phototrophic
6082ec14b8c560ae0cb7922f5a8c28ba	freshwater	0.0176228815945048	Phototrophic
6158a125b6ad873121708cadb37516f0	brackish	0.0129600538599641	Phototrophic
61919a7115d3fd89c37bd88edde39237	freshwater	0.0105845181674566	Consumers
61be31f4d56dfea8d2db812df0eadcf8	freshwater	0.011935318275154	Consumers
64b7a2a9b98b638887e1139aa4abd729	brackish	0.0106064726679358	Phototrophic
66664c0b6f23fb10d9cf4d8ba716ea1a	brackish	0.0133594004561747	Phototrophic
66664c0b6f23fb10d9cf4d8ba716ea1a	brackish	0.0505498204667864	Phototrophic
6677c4a3f7f76c10f79753cf2eb9396c	freshwater	0.0178886756238004	NA
66f3cf322ac255288daa6b73b650e613	brackish	0.180581996192548	Phototrophic
69b4342088ebb257408717ca9163a4ac	freshwater	0.0247354679126013	Consumers
6b9039369a0db0da411c3efea320bbe6	brackish	0.011830296437313	Phototrophic
6baa3592bd769734ccab9c7ccb1885d6	freshwater	0.0127962085308057	Phototrophic
6bd6674a73f44e1848839b0c02043213	freshwater	0.0380651367321699	Phototrophic
6ccc28c8de24662c91cae8d7056fe171	freshwater	0.0120928954239384	Phototrophic
707ffa25fdcf3fbccb5f4bf46a7fad94	brackish	0.0229361117140583	Phototrophic
70bd77c06d144e142e0fcf36fb1afff2	freshwater	0.0196428571428571	Consumers
718662ae71a41098e7808b388510b64f	freshwater	0.0151658767772512	Consumers
73528d26172f76a987de790e792b65a7	freshwater	0.0356961882776871	Consumers
73d56e79e015a5b70a40315e5eb3852d	freshwater	0.0169025697402776	Parasitic
74a78e49882399f4203f52fadab7e10a	brackish	0.0105336105336105	Phototrophic
752c5eaf198efe085a64d16c8a184bfa	freshwater	0.0134575569358178	Phototrophic
75f93fbd6274bc143f8ebc597186cd75	freshwater	0.012204160284599	NA
76aeccf5cb1ae8d9ebea4c880bf1331d	freshwater	0.249944702499447	Phototrophic
76aeccf5cb1ae8d9ebea4c880bf1331d	freshwater	0.0748327759197324	Phototrophic
797d11798fc338a0c411f958b88d741d	freshwater	0.033175355450237	Consumers
7aa0b5c64e0c2cf3d7a635a6be1e6326	freshwater	0.0130952380952381	Consumers
7aa0b5c64e0c2cf3d7a635a6be1e6326	freshwater	0.0200429491768074	Consumers
7ab452e626f790144e0c9fc3da2e83ee	brackish	0.0255024255024255	Consumers
7bdc34af2e4f0be200843cdff9124cdc	brackish	0.102121294533587	Phototrophic
7e48ed020bbda075bfc37718575b81e0	freshwater	0.0106107660455487	Consumers
7e4d3c76c226a9a79cfd2b5eaccaaaa3	freshwater	0.0107940263196806	Consumers
7eb106f2bb23dde61d99669c03734857	freshwater	0.029896965260965	Consumers
7f9d14eb28e2308728cd5d19ff2f670d	freshwater	0.0148809523809524	Consumers
7faf4d68e0e209ba5dd0c5ab858a1cdf	freshwater	0.0207587687902649	Consumers
8123e65160264bfca585b6b701a1180c	brackish	0.0267629728188557	Phototrophic
8123e65160264bfca585b6b701a1180c	brackish	0.0214402085369827	Phototrophic
8123e65160264bfca585b6b701a1180c	brackish	0.0298820635265176	Phototrophic
8123e65160264bfca585b6b701a1180c	brackish	0.0187948833034111	Phototrophic
8578a3caaa8bd646261d5edee39d2b53	freshwater	0.0119047619047619	Consumers
8579f6fbaaa2fd7d49108fa05830e7db	brackish	0.0210672210672211	Phototrophic
8765cabb59cca96cadac6c1e4aa9387b	freshwater	0.0156621880998081	Consumers
88156bfa893fb728d85de8f1ebe8086a	freshwater	0.0456186412865113	Consumers
8ba1459d6896302f76f40b8cf720dfa8	freshwater	0.0105318588730911	Consumers
8cf1941f7322400db33a4dd4982fb519	freshwater	0.01021113243762	Consumers
8d98b622d4f5c963735ed2f49b3b2ee3	freshwater	0.0257868363267834	Phototrophic
8ec8c4b2a338505d55b9c7d19f83d89a	freshwater	0.0130548302872063	Parasitic
8ecde2197ffc01e4f0538f6c46725390	brackish	0.0777078359018884	Consumers
8f07d137f261e9f83b57a16954ee7a34	freshwater	0.0291970802919708	Phototrophic
904517c58b3c2a7b79c1fddad6934d25	freshwater	0.056547619047619	Phototrophic
90511bda7359bea9c28c84eee6c9d04c	freshwater	0.0104166666666667	Consumers
914419d046036756c420e02eee278363	freshwater	0.0207587687902649	Consumers
914419d046036756c420e02eee278363	freshwater	0.0321428571428571	Consumers
914419d046036756c420e02eee278363	freshwater	0.0132001427042455	Consumers
99593147e81d395ba90257e701027de0	freshwater	0.0278699402786994	Phototrophic
99bfb3d3149832d1fb9bb2a377b681b1	brackish	0.0131670131670132	Consumers
99e02917702d142b8a3be4443e7d38b4	freshwater	0.0258792302587923	Consumers
9a22d473cdb14d1fd197ea83ac5af0bd	freshwater	0.0132001427042455	Phototrophic
9b2e71dd349fc9bf5bda82c2b05129a5	freshwater	0.149768993839836	Phototrophic
9b83ab3c47b42a76022b0dc2af1ea0df	freshwater	0.018551600934451	Phototrophic
9b99c08692dbd6051f2a9b9cdb9cd6c2	brackish	0.0245322245322245	Consumers
9bd07aface3c4ecdae477eabcc2e5f7c	freshwater	0.0336435218324982	Consumers
9c0f51b6836a984a9ee13c0eec35d73d	freshwater	0.0242232754081095	Consumers
9d161a2cdf13c584a930d4f31d3e34f0	freshwater	0.0178954903364352	Consumers
9d365112b60d3d5db0f4f94c938a7b4c	freshwater	0.0116903633491311	Consumers
9f77cd4e08f55a342472dcb71d6600ff	brackish	0.0169307575428695	Phototrophic
a0efbe62cddeb70b9417c8b527b19420	brackish	0.0135828135828136	Consumers
a1645481c244dd666c3adc1993187c62	freshwater	0.016304347826087	Consumers
a1d64634aadfe4c69210edee1ff902a5	freshwater	0.016784140969163	Phototrophic
a4f8112fe6d802f250998ac344c11ac9	freshwater	0.104977973568282	Phototrophic
a4f8112fe6d802f250998ac344c11ac9	freshwater	0.138692623153318	Phototrophic
a5144b2a59f27df3cf5286bb75451918	freshwater	0.0174740101747401	Consumers
a85f45c0b606093b6f798a33345fa56c	freshwater	0.0103460577952194	Phototrophic
a996b87bc0febc6153e8893498fb365c	freshwater	0.183374955404923	Consumers
aa3f35cc88c8c193d4c2b9d97dddc328	freshwater	0.0100440528634361	Consumers
aa3f35cc88c8c193d4c2b9d97dddc328	freshwater	0.0106230544987401	Consumers
AAAA02038450.2584.4394	freshwater	0.0163528926755531	Parasitic
AB103389.1.1752	brackish	0.0494175529990594	Phototrophic
AB246744.1.1758	brackish	0.356510169169359	Phototrophic
AB430588.1.1784	brackish	0.0235620235620236	Phototrophic
AB512124.1.1765	freshwater	0.0190403071017274	Phototrophic
AB695519.1.1774	freshwater	0.0113095238095238	Consumers
AB701548.1.1643	freshwater	0.0780806142034549	Phototrophic
AB749074.1.1671	freshwater	0.0462955854126679	NA
AB749076.1.1661	freshwater	0.0100052659294365	NA
AB749076.1.1661	freshwater	0.189635316698656	NA
AB749076.1.1661	freshwater	0.0159030837004405	NA
AB749084.1.1662	freshwater	0.0195179653999704	Phototrophic
AB902257.1.1813	freshwater	0.0100214745884037	Consumers
AB917139.1.2177	freshwater	0.0272063702720637	Phototrophic
AB983625.1.1744	freshwater	0.0248447204968944	Phototrophic
AB983625.1.1744	freshwater	0.0164109882268998	Phototrophic
ad5051523daa487697b47096daf3d089	freshwater	0.0162557438608627	Phototrophic
ae76df3873f5f38a24efd192cf5a592c	freshwater	0.0100334448160535	Phototrophic
AF045048.1.1790	brackish	0.0631438889944877	Phototrophic
AF070445.1.1802	freshwater	0.0502101305021013	Parasitic
AF070445.1.1802	freshwater	0.0442546583850932	Parasitic
AF070445.1.1802	freshwater	0.0196488294314381	Parasitic
AF115442.1.2194	freshwater	0.0146271851587585	Phototrophic
AF255358.1.1746	freshwater	0.012568386810587	Consumers
AF255359.1.1666	freshwater	0.0104515050167224	Consumers
AF255359.1.1666	freshwater	0.0117731002497324	Consumers
AF255359.1.1666	freshwater	0.0544022906227631	Consumers
AF255359.1.1666	freshwater	0.0152535385461042	Consumers
AF255359.1.1666	freshwater	0.033269259204495	Consumers
AF274258.1.1737	brackish	0.162098460368751	Phototrophic
AF411276.1.1857	freshwater	0.0131922495533874	Consumers
AF411284.1.1817	freshwater	0.0194839389152185	Consumers
AF534712.1.2943	freshwater	0.0133928571428571	Consumers
afec90439fdb6ea220f7f6f2029d2e37	freshwater	0.0395767486601622	Consumers
afff594f673b5d1c0ef34c9a558238f7	freshwater	0.0107142857142857	Consumers
AJ238656.1.1774	freshwater	0.0236361137831524	Parasitic
AJ418794.1.1798	freshwater	0.010351966873706	Consumers
AJ535188.1.1803	brackish	0.0115038115038115	Phototrophic
AJ853447.1.1753	freshwater	0.0135569033178737	Phototrophic
AJ867279.1.1784	freshwater	0.0196497944935533	Phototrophic
AM501979.1.1735	freshwater	0.0259197324414716	Phototrophic
AM502040.1.1744	freshwater	0.0346057795219408	Phototrophic
AM712618.1.1803	brackish	0.0772013602488966	Phototrophic
AM712618.1.1803	brackish	0.122410188177153	Phototrophic
AY102613.1.1701	freshwater	0.0116812065651338	Consumers
AY179972.1.1747	brackish	0.0353925109294811	Parasitic
AY179993.1.1882	brackish	0.0199730700179533	Phototrophic
AY179993.1.1882	brackish	0.0166177908113392	Phototrophic
AY187926.1.1504	brackish	0.0603453893776474	Consumers
AY187926.1.1504	brackish	0.0624438958707361	Consumers
AY485520.1.1762	brackish	0.014979802513465	Phototrophic
AY520451.1.1783	freshwater	0.0357829365666125	Consumers
AY651071.1.1696	freshwater	0.0541179949726453	Consumers
AY821936.1.1487	brackish	0.0211366660330736	Consumers
AY821973.1.1586	freshwater	0.0100547094484696	Phototrophic
b163d576be32627064781e78d3ce2201	freshwater	0.0154682274247492	Consumers
b17ac9f9e0f86dc3f7ee4adb39e36a31	brackish	0.0785272075594656	Phototrophic
b17ac9f9e0f86dc3f7ee4adb39e36a31	brackish	0.0578994614003591	Phototrophic
b31d603ee69ce9c585afdddb9bb79801	freshwater	0.016215473409372	Consumers
b4e5273f1c7249c8838e1dab9c1688c8	freshwater	0.0191153238546603	Phototrophic
b5500c01a01ab7dcb3410a82ac327828	freshwater	0.0238294314381271	Phototrophic
b5a1e40da394275459cd4ee06e26b6e4	freshwater	0.0103083700440529	NA
b5b179a57e40b9e251a8c4992bc4456d	freshwater	0.0137959866220736	Phototrophic
b5b179a57e40b9e251a8c4992bc4456d	freshwater	0.44501998761331	Phototrophic
b5b179a57e40b9e251a8c4992bc4456d	freshwater	0.0115850447604002	Phototrophic
b6c5833806ee44d9985cdf3ea7adeb85	brackish	0.0113543649714441	Consumers
b70bf172fab33c868a4c0e7dada8b20d	freshwater	0.0164128345408842	Consumers
b864530b7e1a0724f9bbb695dbe53c2d	freshwater	0.0348458149779736	Phototrophic
b864530b7e1a0724f9bbb695dbe53c2d	freshwater	0.0330055832798063	Phototrophic
b8d29ebcce68dfbcf6e329b4883ef3ec	freshwater	0.0273809523809524	Phototrophic
bedde2c765c9cae7e885a3bca1521698	brackish	0.464033264033264	Consumers
c30856eb17f25249dc1883de092064b2	brackish	0.0154337775360348	Phototrophic
c3bd6d926c3185d13538adeeee5b4439	freshwater	0.050823192555476	Consumers
c564506e72cf542422cd80c3d3dc5a20	freshwater	0.0520186335403727	Phototrophic
c5994cd4db882f696e12d5f751cbb4f2	freshwater	0.0665113871635611	Phototrophic
c5b3e85b7af0274e269e67cef432f0a4	freshwater	0.0134575569358178	Phototrophic
c62868a63b06edb1f25faf06ab84f234	brackish	0.0475931465868915	Phototrophic
c7699744a594fd37561f2dd299f6584f	freshwater	0.0235119047619048	Consumers
c80fdec1463142d7cda1c2eac9392044	freshwater	0.0144136028376781	Consumers
c976286c759f81b778df938d82177bc6	freshwater	0.0213210702341137	Consumers
ca299d70ad5d054ad247657436cdaf87	freshwater	0.031547619047619	Consumers
ca2e12570f86a6ad94979ddfc1189c93	brackish	0.197525504666811	Phototrophic
cac4d9368fa417e34eecddedf229c328	brackish	0.0653353592359453	Phototrophic
cb05e870a41b1db0a11d9999dc49973d	freshwater	0.0236361137831524	Consumers
cbc2c107c0b11a80fd325796210c21de	freshwater	0.0190743752772438	Consumers
cc97748d19c76c4c278ab425d2284b8e	freshwater	0.0238060032529942	Parasitic
cd1bdc03183a5fd30bced94b0b40debf	freshwater	0.0225155279503106	Phototrophic
ce21c01f33a73709981a2a903a600752	freshwater	0.0191511387163561	Phototrophic
ce3f55e6322f8c3472b700d9ac5c6110	freshwater	0.0123788546255507	NA
ce3f55e6322f8c3472b700d9ac5c6110	freshwater	0.0109195118335886	NA
ce7cd920f2be511842f06099b554e28e	freshwater	0.0107940263196806	Consumers
cee4e71e88664eabb599b66645425dc5	freshwater	0.156545105566219	Consumers
cee4e71e88664eabb599b66645425dc5	freshwater	0.014218009478673	Consumers
cf828c818980bdf4d28b9e617c6821be	freshwater	0.0167651504740965	Consumers
cff4e7affcbff0fe630e717a57f6094d	freshwater	0.0171796707229778	Consumers
d1defa4f0c7d54a545e6f86ca42a6d39	brackish	0.0144139243948871	Phototrophic
d2d0201836bf58dd7bf0e23b50c0ee38	freshwater	0.0112376164424072	NA
d2f6fad2086bf4ab2b69b3f3b6ee73a8	freshwater	0.0196428571428571	Consumers
d333e8a26112e91ce3c4425c0283a071	freshwater	0.0100214745884037	Consumers
d333e8a26112e91ce3c4425c0283a071	freshwater	0.0110119047619048	Consumers
d4d10876e0a333b919e9f73ed437452f	freshwater	0.0142339544513458	Phototrophic
d600f29fd76f7dd70a3b1d517514840a	brackish	0.0537768537768538	Phototrophic
d7a2be0bbaafc1372b264e4791e07066	freshwater	0.0171774082726398	Parasitic
d81d9a4eb3b3c9d24233c28863d4e22c	freshwater	0.0123866401238664	Consumers
d826ec70c9f66483a80cb41b170ae514	freshwater	0.0408902691511387	Parasitic
d897fe3fa2af7b9e3889b348c368cb5c	freshwater	0.0386542591267001	Parasitic
d9ad536b679855d36fd9639147ee6421	freshwater	0.262769878883623	Consumers
ddc0ceb77f604b2b82f6ec17e732d3a0	freshwater	0.0993680884676145	Phototrophic
dde139feff94d65467f952a9bb12ccbd	freshwater	0.0210110584518167	Consumers
dde139feff94d65467f952a9bb12ccbd	freshwater	0.0133928571428571	Consumers
DQ057346.1.1769	brackish	0.0202671880091235	Consumers
DQ057346.1.1769	brackish	0.0281358281358281	Consumers
DQ078297.1.1765	freshwater	0.0455486542443064	Phototrophic
DQ078298.1.1736	freshwater	0.0210488762040671	Phototrophic
DQ103837.1.1567	brackish	0.0334380610412926	Phototrophic
DQ103837.1.1567	brackish	0.0141414141414141	Phototrophic
DQ386760.1.1531	brackish	0.0278561609145503	Phototrophic
e01dacb9aee286f5db0930205350a5e4	freshwater	0.0162987679671458	Phototrophic
e01dacb9aee286f5db0930205350a5e4	freshwater	0.0317621145374449	Phototrophic
e01dacb9aee286f5db0930205350a5e4	freshwater	0.025445921241168	Phototrophic
e19c31499bf56af5a0c4d3472c44cc43	freshwater	0.0122726600621026	Consumers
e2c118db947adac3e591b174ea6f3cd5	brackish	0.0798060921785688	Consumers
e348579c1d51f03f7e2ab869d5b4b397	freshwater	0.0253300035676061	NA
e36e5b16b05aadcc494b85bbb0252063	freshwater	0.0312796208530806	Phototrophic
e3e1773190fe92a762df0cafb16c151b	brackish	0.0180853957030188	Phototrophic
e4692434c4d60f701cb1716f377819ef	freshwater	0.0142857142857143	Consumers
e96c692de2d8dd6b6f49c42671e3acfe	freshwater	0.0126382306477093	Consumers
e9f846fd1064d9a761a619a58efc081f	brackish	0.110348109872178	Phototrophic
ebacbdb0d66fbcdf49b602b9ef84cd4d	freshwater	0.0133296688195685	Consumers
ec74eb84866fd3d6e77afe55c78f3685	freshwater	0.0220238095238095	Consumers
ed992e0598841c426a112a2972859bbc	freshwater	0.05625	Consumers
EF023314.1.1782	freshwater	0.0353303964757709	Phototrophic
EF023357.1.1797	freshwater	0.0180094786729858	Consumers
EF024013.1.1810	freshwater	0.0192733017377567	Consumers
EF219381.1.2004	freshwater	0.0142916036828363	Consumers
EF456752.1.1788	freshwater	0.0110584518167457	Consumers
EU880597.1.1707	brackish	0.0147279244053438	Consumers
f234c111cd70d46dde8c21a7387326b4	brackish	0.0110144139243949	Phototrophic
f2cfdf3d25c27e8c706fe55ef16452ed	freshwater	0.0108561220283084	Consumers
f4893534d0085072ef2611ea7c55f9dd	freshwater	0.0179163901791639	Consumers
f8863c1904cb25b08f2f1e1cbd04bdfb	freshwater	0.013913663931502	Phototrophic
fa3b63b5d3bc039f188bef52aba9afa2	freshwater	0.0248447204968944	NA
fad7f84f374ba6f621f74202852bbe38	freshwater	0.0113095238095238	Consumers
fdfe7dfd87abbfdb604b691079127922	freshwater	0.0226452248112898	Phototrophic
fe070eba0bb81f90bf841be2ec2aa93a	freshwater	0.0100334448160535	Consumers
FJ868196.1.1668	brackish	0.0168873429084381	Consumers
FJ868196.1.1668	brackish	0.0108178559791463	Consumers
FJ870099.1.1769	freshwater	0.0370856580242862	Consumers
FJ998027.1.1718	freshwater	0.0694345025053686	Consumers
FPLS01014549.4.1675	freshwater	0.0185515519086693	Consumers
FPLS01014549.4.1675	freshwater	0.0274881516587678	Consumers
FPLS01014549.4.1675	freshwater	0.0479199578725645	Consumers
FPLS01014549.4.1675	freshwater	0.0134670880857496	Consumers
FPLS01014549.4.1675	freshwater	0.0339285714285714	Consumers
FPLS01020493.8.1436	freshwater	0.0187993680884676	Consumers
FPLS01050367.9.1553	freshwater	0.02211900022119	Parasitic
FPLS01050367.9.1553	freshwater	0.0372073578595318	Parasitic
FR865714.2.1766	freshwater	0.0183587701835877	Phototrophic
GQ324977.1.1728	freshwater	0.0100052659294365	Phototrophic
GQ324977.1.1728	freshwater	0.458932238193018	Phototrophic
GQ324977.1.1728	freshwater	0.011829069939376	Phototrophic
GQ324977.1.1728	freshwater	0.0121654501216545	Phototrophic
GQ324977.1.1728	freshwater	0.0183946488294314	Phototrophic
GQ324977.1.1728	freshwater	0.188897021564101	Phototrophic
GQ324977.1.1728	freshwater	0.0119001919385797	Phototrophic
GQ330588.1.1452	freshwater	0.0485194434534427	Consumers
GQ330598.1.1453	freshwater	0.0269151138716356	Phototrophic
GU067985.1.1791	freshwater	0.0131987577639752	Phototrophic
GU067989.1.1789	freshwater	0.0100931677018634	Phototrophic
GU290068.1.1784	freshwater	0.0211453744493392	Phototrophic
GU385623.1.1694	freshwater	0.0541636169134621	Phototrophic
GU479948.1.1461	freshwater	0.0393374741200828	Parasitic
HF562290.1.1727	freshwater	0.0996376811594203	Phototrophic
HM014309.1.1750	freshwater	0.019047619047619	Consumers
HM628658.1.1579	freshwater	0.0315955766192733	Consumers
HM628658.1.1579	freshwater	0.0300644237652112	Consumers
HM628658.1.1579	freshwater	0.0229490174522468	Consumers
HM628658.1.1579	freshwater	0.028436018957346	Consumers
HM628658.1.1579	freshwater	0.0157738095238095	Consumers
HM628658.1.1579	freshwater	0.015340706386015	Consumers
HQ912416.1.1725	freshwater	0.0540284360189573	Phototrophic
HQ912569.1.1422	brackish	0.0146431777378815	Phototrophic
HQ912589.1.1747	freshwater	0.0361466133663645	Phototrophic
HQ912589.1.1747	freshwater	0.0139751552795031	Phototrophic
JN054668.1.1519	freshwater	0.075204600752046	Parasitic
JN054668.1.1519	freshwater	0.0459866220735786	Parasitic
JN120205.1.1541	freshwater	0.0225613802256138	Consumers
JN418571.1.1647	freshwater	0.0171796707229778	Phototrophic
JN418572.1.1706	freshwater	0.011543218359214	Phototrophic
JQ315186.1.1636	freshwater	0.017695200176952	Phototrophic
JQ315655.1.1650	freshwater	0.0177092511013216	Phototrophic
JQ420104.1.1782	brackish	0.021487881508079	Phototrophic
JQ420104.1.1782	brackish	0.0422939068100358	Phototrophic
JQ967332.1.1673	freshwater	0.015340706386015	Consumers
JX178767.1.1731	brackish	0.0623004235907462	Consumers
JX178767.1.1731	brackish	0.0309133752244165	Consumers
JX296639.1.1721	freshwater	0.0157044901570449	Phototrophic
JX457422.1.1496	brackish	0.0112266112266112	Phototrophic
KC222331.1.1679	brackish	0.0129039497307002	Phototrophic
KF141789.1.1728	freshwater	0.015748031496063	Consumers
KF177711.1.1697	brackish	0.0220267188009124	Phototrophic
KF177711.1.1697	brackish	0.024741921005386	Phototrophic
KJ011630.1.1717	freshwater	0.0409581546650895	Phototrophic
KJ961665.1.1783	freshwater	0.016264971166642	Phototrophic
KT257373.1.1797	freshwater	0.047360248447205	Parasitic
KT321975.1.1719	brackish	0.0819767021199624	Phototrophic
KU561109.1.1708	brackish	0.0294546678635548	Phototrophic
KU561109.1.1708	brackish	0.0164222873900293	Phototrophic
KU561119.1.1703	brackish	0.076188408942913	Phototrophic
KU561119.1.1703	brackish	0.0179813723626687	Phototrophic
KU561150.1.1705	brackish	0.0140762463343109	Phototrophic
KU561150.1.1705	brackish	0.0338868940754039	Phototrophic
KU561155.1.1715	brackish	0.019941348973607	Phototrophic
KU851876.1.1732	brackish	0.0125773867709352	Phototrophic
KU851876.1.1732	brackish	0.0166068222621185	Phototrophic
KU870461.1.1729	brackish	0.015900944933203	Consumers
KX119518.1.1683	freshwater	0.0456186412865113	Consumers
KX465155.1.1797	freshwater	0.0230331262939959	Phototrophic
KY176378.1.1761	freshwater	0.0210488762040671	Consumers
KY451728.1.1705	freshwater	0.0128847530422334	Consumers
KY675156.1.1626	brackish	0.0193548387096774	Consumers
KY675170.1.1627	brackish	0.328185076572173	Consumers
KY675170.1.1627	brackish	0.0486422800718133	Consumers
LASS02003325.4070.5829	freshwater	0.026656314699793	Consumers
LASS02003325.4070.5829	freshwater	0.781096160157532	Consumers
LC086346.1.1743	freshwater	0.0415040268787984	Phototrophic
LC150082.1.1722	freshwater	0.0798494983277592	Consumers
LC150082.1.1722	freshwater	0.0536864710093057	Consumers
LC150082.1.1722	freshwater	0.0607142857142857	Consumers
LC150092.1.1713	freshwater	0.033175355450237	Consumers
LC150092.1.1713	freshwater	0.0515390121689334	Consumers
LC150092.1.1713	freshwater	0.0549411344987513	Consumers
LC150121.1.1653	freshwater	0.0105318588730911	Consumers
LC150141.1.1408	freshwater	0.0145833333333333	Consumers
LC150141.1.1408	freshwater	0.0252851449773258	Consumers
LC150141.1.1408	freshwater	0.0164638511095204	Consumers
LC222939.1.1743	freshwater	0.0205371248025276	Consumers
LC380260.1.1743	freshwater	0.0523348017621145	Phototrophic
LC380260.1.1743	freshwater	0.0121635610766046	Phototrophic
LN869943.1.1714	freshwater	0.0117673554416981	Consumers
M32705.1.1809	freshwater	0.0584031881269754	Parasitic
MF289777.1.1752	freshwater	0.0107485604606526	Consumers
MF289777.1.1752	brackish	0.0558558558558559	Consumers
MF474349.1.1613	brackish	0.0813913704618894	Consumers
MG994988.1.1672	freshwater	0.0136005726556908	Consumers
MG994988.1.1672	freshwater	0.0118234165067178	Consumers
MG994988.1.1672	freshwater	0.956970180571564	Consumers
MG994988.1.1672	freshwater	0.0106107660455487	Consumers
MG994988.1.1672	freshwater	0.016767748840528	Consumers
MG994999.1.1711	freshwater	0.0146746380750037	Consumers
MH715344.1.1691	freshwater	0.0658241179568194	Consumers
U17356.1.1750	freshwater	0.0107372942018611	Consumers
U17356.1.1750	freshwater	0.0210488762040671	Consumers
U17356.1.1750	freshwater	0.0146919431279621	Consumers
X70705.1.2337	freshwater	0.0239029611130931	Phototrophic
Y10566.1.1788	freshwater	0.0137163561076605	Phototrophic
Y10566.1.1788	freshwater	0.0104982995711962	Phototrophic
