# Supplementary material for: Protist taxonomic and functional diversity in aquatic ecosystems of the Brazilian Atlantic Forest
Source: PeerJ. 2023 Aug 1;11:e15762. doi: 10.7717/peerj.15762 (PMC10402703; doi:10.7717/peerj.15762)
Supplement: Supplemental Information 4 [file peerj-11-15762-s004.xlsx]

## Sheet: Supp Table 4
Supplemental Table S4. Richness, relative and absolute abundances of the main protist lineages in freshwater and brackish systems of the Brazilian Atlantic Forest
Supergroup	Phylum	Relative abundance in freshwater	Relative abundance in brackish	Absolute abundance in freshwater	Absolute abundance in brackish	OTU richness in freshwater	OTU richness in brackish	Total number of OTUs
Amoebozoa	Amoebozoa	0.0071014209154205	0	1125	0	29	0	29
CRuMs	Ancyromonadida	0.000246182591734577	0	39	0	2	0	2
TSAR	Apicomplexa	0.00263226001931586	0.0121195572265748	417	1154	15	6	21
Obazoa	Apusomonadidae	0.000113622734646728	0.000672141821924426	18	64	1	3	4
TSAR	Bicosoecida	0.00748016336424293	0.00191140330609759	1185	182	19	2	21
Haptista	Centrohelida	0.0016538420265246	0	262	0	8	0	8
TSAR	Cercozoa	0.0509534841149105	0.00285660274317881	8072	272	138	15	153
Archaeplastida	Chlorophyta	0.088026057480479	0.0115524375643261	13945	1100	145	16	161
TSAR	Ciliophora	0.398897859473927	0.274244365561133	63193	26113	310	141	451
Cryptista	Cryptophyceae	0.0114190848319962	0.000399084206767628	1809	38	17	3	20
TSAR	Diatomea	0.2503992576648	0.470551786426936	39668	44805	157	179	336
TSAR	Dinoflagellata	0.00274588275396259	0.187664097124493	435	17869	7	41	48
Amoebozoa	Gracilipodida	0.000252494965881618	0	40	0	2	0	2
Obazoa	Holozoa	0.0161596778164235	0.00151231909932996	2560	144	22	8	30
TSAR	Hyphochytriomycetes	0.00121828821037881	0	193	0	5	0	5
Cryptista	Kathablepharidae	0.000189371224411213	0.000178537671448676	30	17	2	1	3
TSAR	Labyrinthulomycetes	0.0309369456946452	0.00115524375643261	4901	110	96	7	103
TSAR	MASTs	0.00882469905756254	0.000178537671448676	1398	17	17	2	19
Obazoa	NucleariidaanFonticulgroup	0.000195683598558254	0	31	0	2	0	2
TSAR	Ochrophyta	0.0856967914202211	0.0315381545506102	13576	3003	89	8	97
TSAR	Peronosporomycetes	0.0174347773941257	0.000756159549664979	2762	72	44	4	48
Archaeplastida	Phragmoplastophyta	0.0125426874301694	0	1987	0	16	0	16
TSAR	Protalveolata	0.00252494965881618	0.00172236341868134	400	164	8	3	11
Haptista	Prymnesiophyceae	0	0.000462097502573043	0	44	0	1	1
CRuMs	Rigifilida	0.00235451555684609	0.000525110798378458	373	50	11	2	13
Obazoa	Rozellomycota (before named LKM15)	0.0108651728573976	0	984	0	9	0	9
